# Supplementary material for: Quantitative Structure–Activity Relationship (QSAR) Study Predicts Small-Molecule Binding to RNA Structure
Source: PubMed Central journal article supplement — J Med Chem. 2022 May 6;65(10):7262–77. doi: 10.1021/acs.jmedchem.2c00254 (PMC9150105; doi:10.1021/acs.jmedchem.2c00254), 2022-05-06
Supplement: jm2c00254_si_002.pdf [file jm2c00254_si_002.pdf]

## Supporting Information

### Quantitative Structure Activity Relationship (QSAR) study predicts small molecule binding to RNA structure

Zhengguo Cai; Martina Zafferani; Olanrewaju M. Akande; Amanda E. Hargrove\*

Social Science Research Institute, 140 Science Drive, Durham, NC, 27708, USA

Department of Chemistry, Duke University, 124 Science Drive, Durham, NC 27708, USA

\*Corresponding author: amanda.hargrove@duke.edu

### Table of Contents

| Section  | Description                                                                                   | Page  |
|----------|-----------------------------------------------------------------------------------------------|-------|
| <b>A</b> | <b>Supplementary table and figures</b>                                                        | S-2   |
|          | <b>Table S1.</b> Parameters used for conformation search                                      | S-2   |
|          | <b>Figure S1.</b> Natural log transformation of response variables                            | S-2   |
|          | <b>Figure S2.</b> Lasso selection of $\ln k_{on}/\ln k_{off}$ descriptors and baseline models | S-3   |
|          | <b>Figure S3.</b> Q-Q plot and Williams plot for $\ln k_{on}/\ln k_{off}$ models              | S-4   |
|          | <b>Figure S4.</b> Plots of fitting residuals against each descriptor from 3 MLR models        | S-5   |
|          | <b>Figure S5.</b> Plots of fitting residuals against fitted values for 3 MLR models           | S-5   |
|          | <b>Figure S6.</b> Model stability test of $\ln k_{on}/\ln k_{off}$ models                     | S-6   |
| <b>B</b> | <b>Chemistry</b>                                                                              | S-7   |
|          | Chemical structures of molecules for model training                                           | S-7   |
|          | Synthesis and characterization of diminazenes                                                 | S-8   |
| <b>C</b> | <b>Surface plasmon resonance</b>                                                              | S-18  |
|          | Sensorgrams and fitting parameters                                                            | S-18  |
| <b>D</b> | <b>QSAR modeling</b>                                                                          | S-116 |
|          | Descriptor calculation                                                                        | S-116 |
|          | Methods and scripts                                                                           | S-117 |
|          | Descriptor refinement                                                                         | S-117 |
|          | Representative data splitting by Kennard-Stone algorithm and PCA                              | S-119 |
|          | Descriptor selection by lasso and model selection                                             | S-121 |
|          | Ensemble learning-based models                                                                | S-124 |
|          | Model assessment: Q-Q plot and Williams plot                                                  | S-128 |
|          | Predictor stability test                                                                      | S-130 |
| <b>E</b> | <b>References</b>                                                                             | S-132 |

## Section A. Supplementary table and figures

| Parameter          | Input |
|--------------------|-------|
| Rejection limit    | 100   |
| Iteration limit    | 10000 |
| RMS gradient       | 0.005 |
| MM iteration limit | 500   |
| RMSD limit         | 0.15  |
| Energy window      | 3     |
| Conformation limit | 10000 |

**Table S1.** Parameters used for conformation search

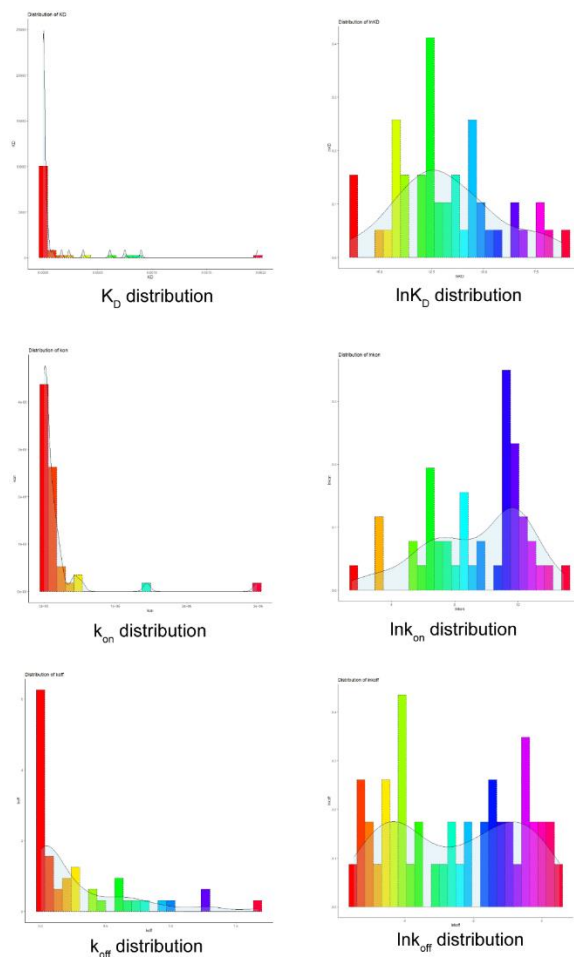

**Figure S1** Natural log transformation was taken for each response variable to shift the skewed distribution close to a normal distribution.

### A. Lasso selection of $\text{Ink}_{\text{on}}$ descriptors

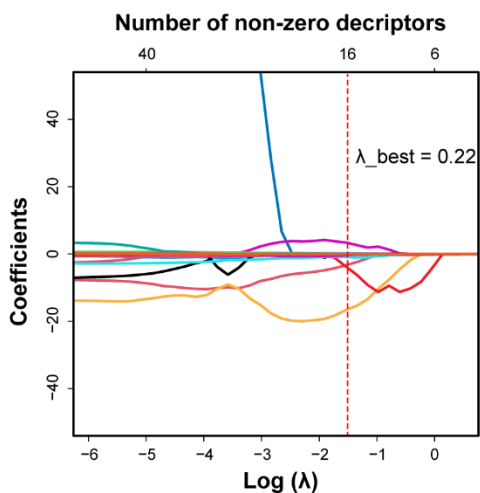

### B. Baseline model of $\text{Ink}_{\text{on}}$

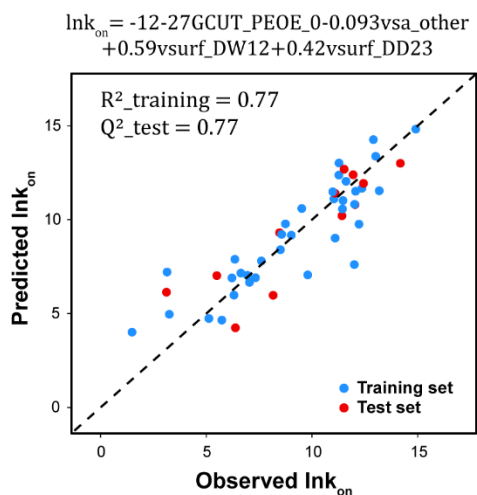

### C. Lasso selection of $\text{Ink}_{\text{off}}$ descriptors

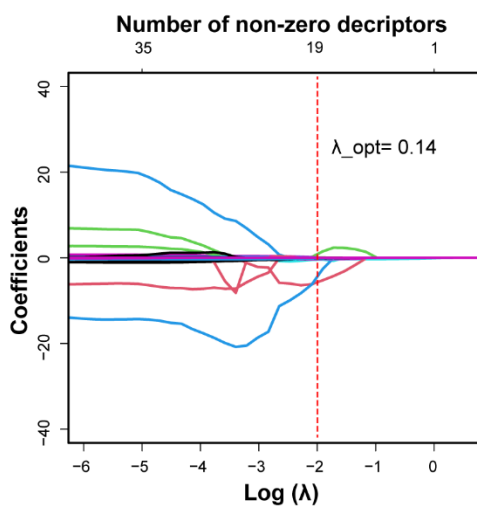

### D. Baseline model of $\text{Ink}_{\text{off}}$

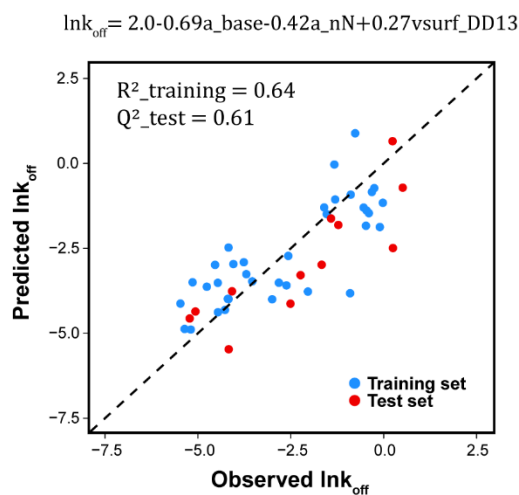

**Figure S2** **A.** Lasso selection of  $\text{Ink}_{\text{on}}$  descriptors, the best  $\lambda$  was determined as 0.22 from 5-fold cross validation. **B** Observed  $\text{Ink}_{\text{on}}$  was plotted with the value predicted by the MLR baseline model shown at top. **C** Lasso selection of  $\text{Ink}_{\text{off}}$  descriptors, the optimized  $\lambda$  was determined as 0.14 to ensure the inclusion of a decisive descriptor: vsurf\_DD13. **D** Observed  $\text{Ink}_{\text{off}}$  was plotted with the value predicted by the MLR baseline model shown at top.

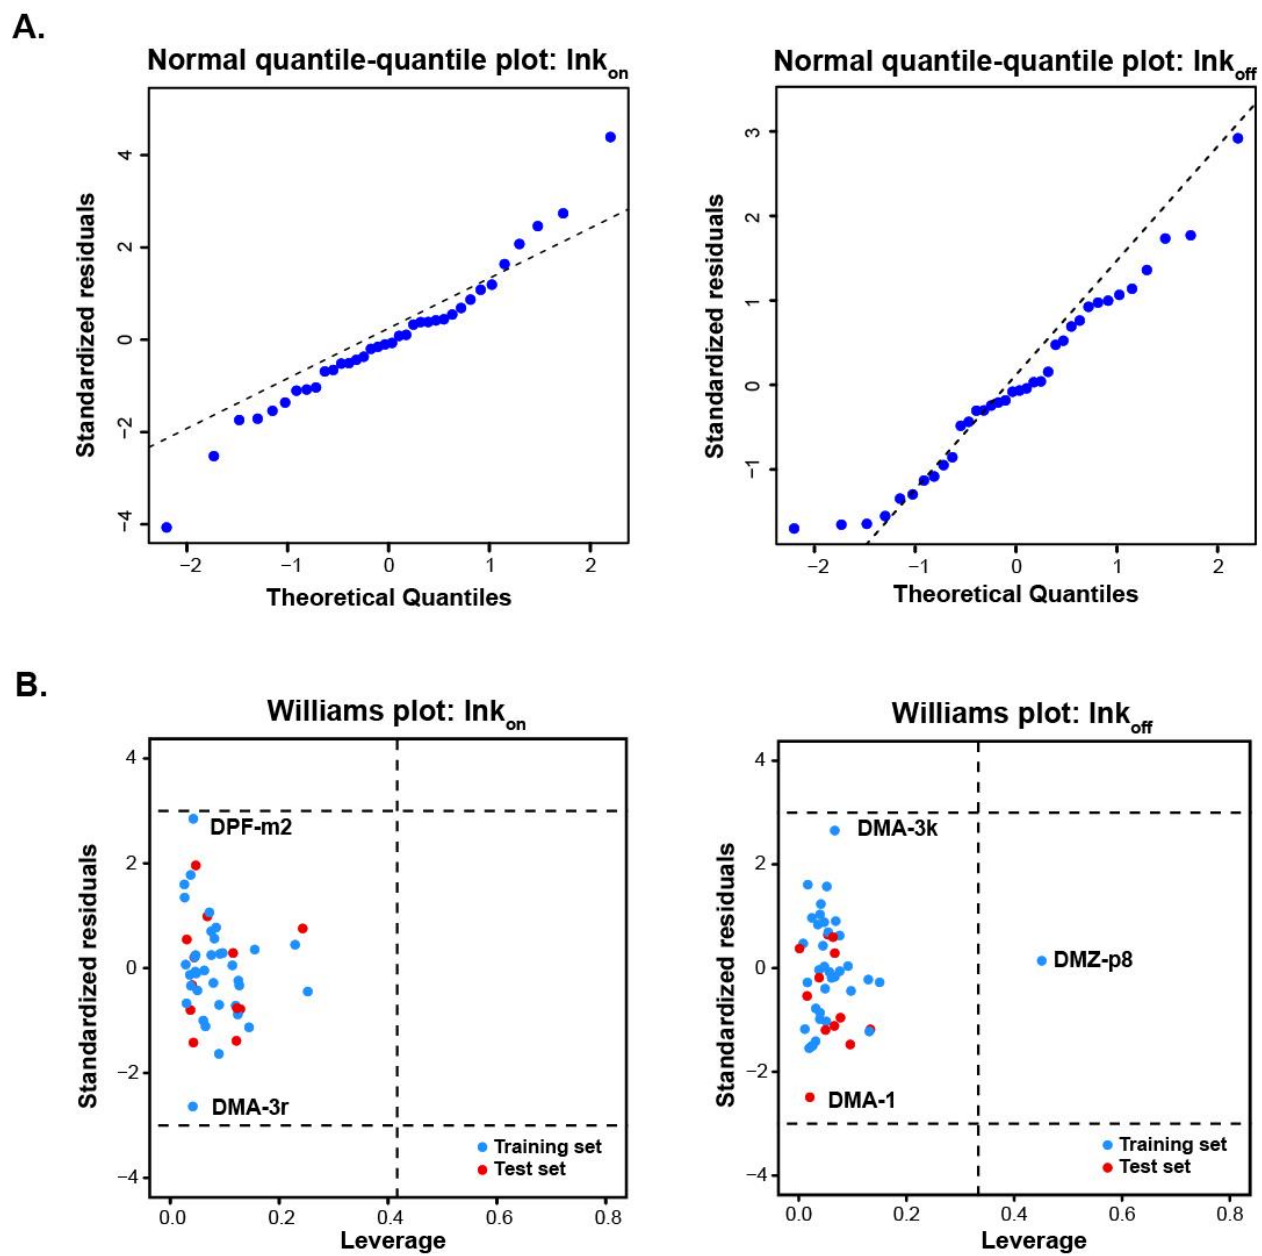

**Figure S3 A.** Normal quantile-quantile plots of  $\ln k_{on}$  and  $\ln k_{off}$  models. **B.** Williams plot showed applicable domain of  $\ln k_{on}$  and  $\ln k_{off}$  models with training and test sets.

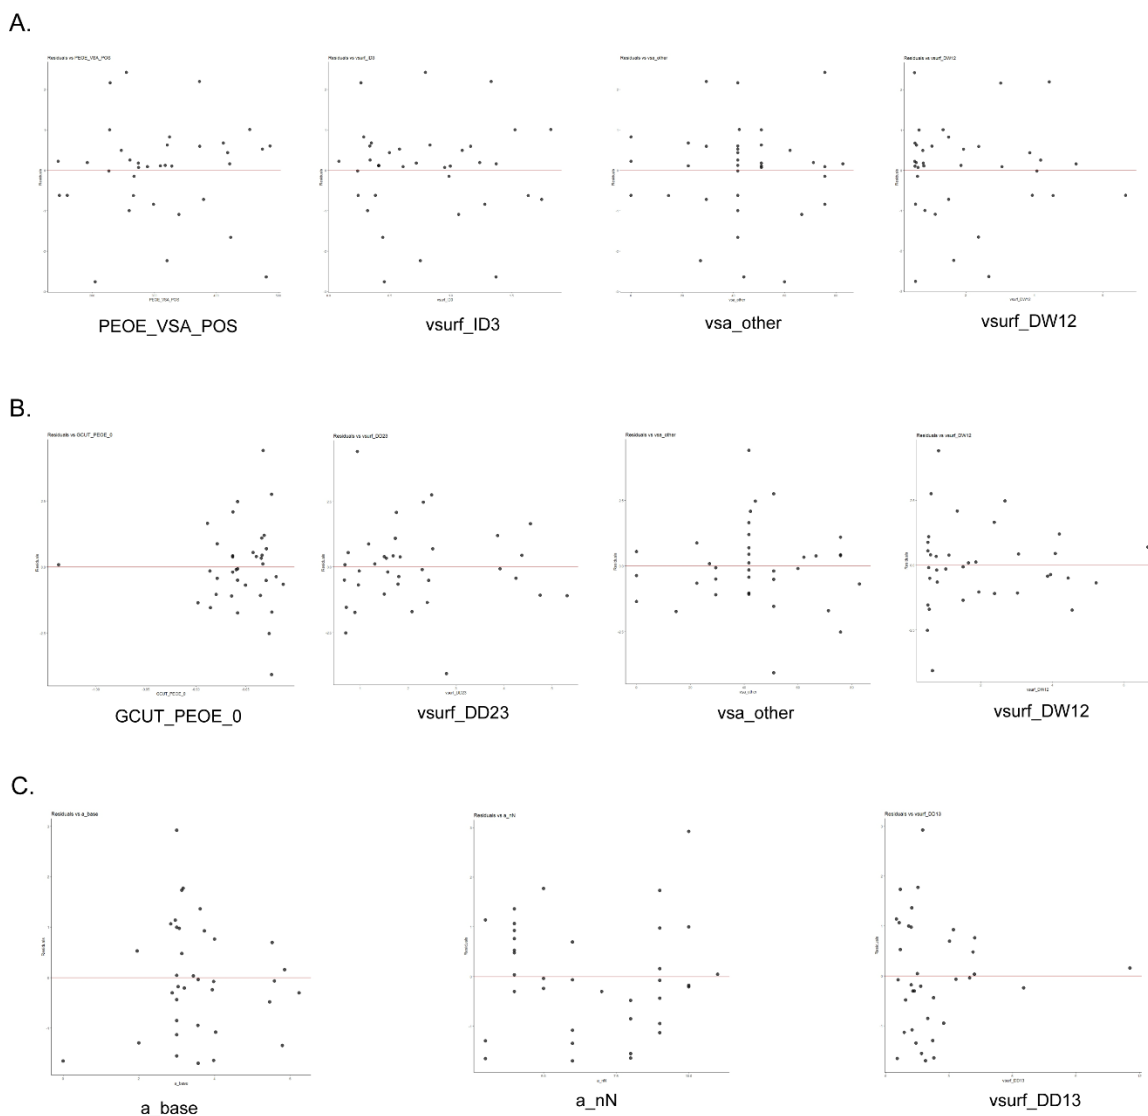

**Figure S4** Plots of fitting residuals against each descriptor from 3 MLR models (**A.**  $\ln K_D$  model. **B.**  $\ln K_{on}$  model. **C.**  $\ln K_{off}$  model) to check linearity assumption.

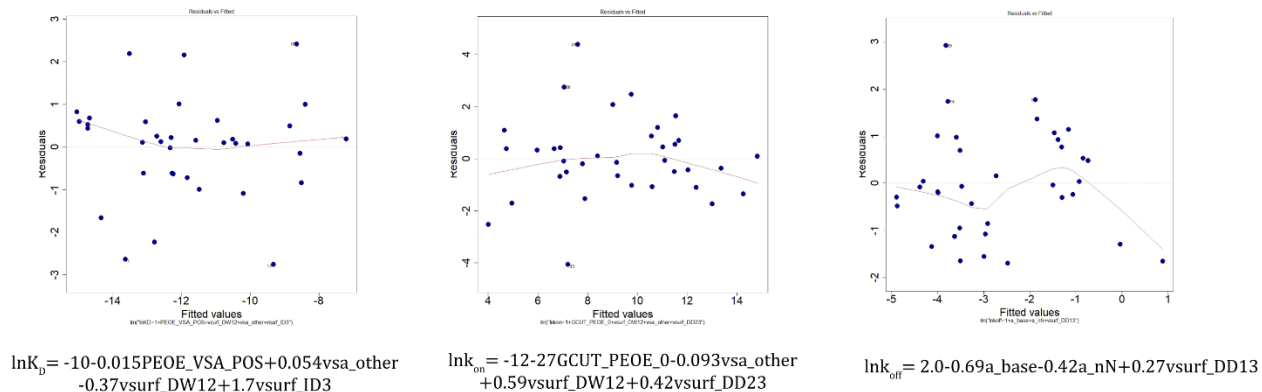

**Figure S5** Plots of fitting residuals against the fitted values for 3 MLR models to check independence and equal variance assumption.

### A. Train/test stability of $\ln k_{on}$ model

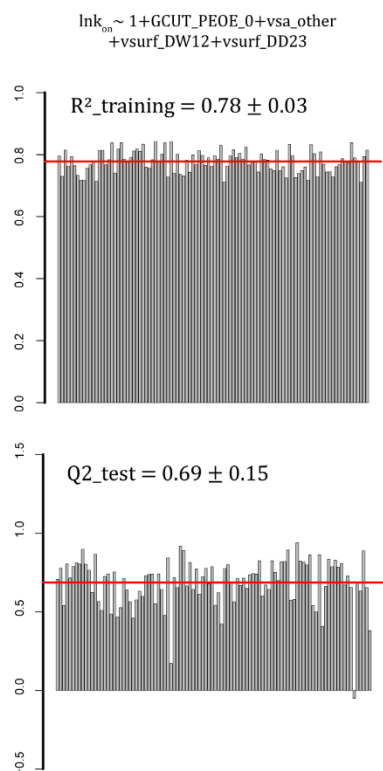

### B. Train/test stability of $\ln k_{off}$ model

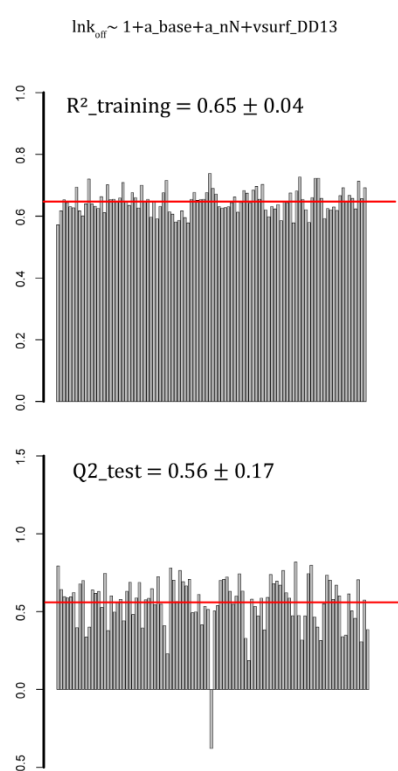

**Figure S6 A.** Model stability test on  $\ln k_{on}$  data using formula:  $\ln k_{on} \sim 1 + \text{GCUT\_PEOE\_0} + \text{vsa\_other} + \text{vsurf\_DW12} + \text{vsurf\_DD23}$ . **B.** Model stability test on  $\ln k_{off}$  data using formula:  $\ln k_{off} \sim 1 + a_{\text{base}} + a_{\text{nN}} + \text{vsurf\_DD13}$ .

## Section B. Chemistry

### 1. Chemical structures of molecules for model training

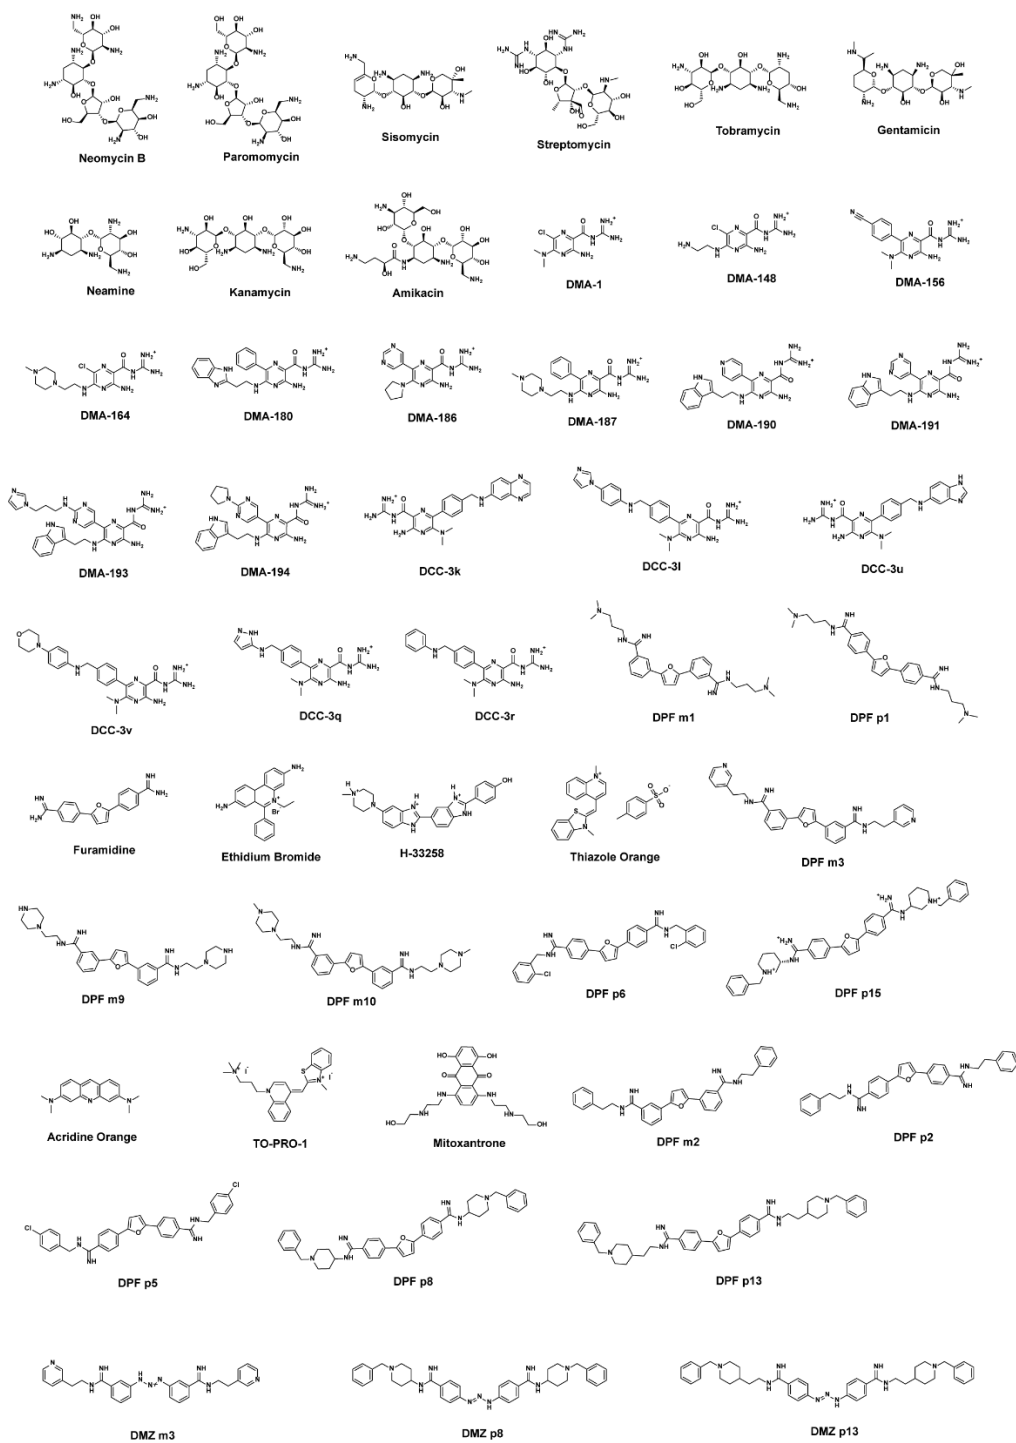

**Figure S7.** Chemical structures of molecules for model training: DMA-1~DMA-164 are from ref 11, DMA-180~DMA-194 from ref 22, DMA compounds from ref 33, DPF x1~DPF x10 from ref 44 (x = m or p), DPF p13, p15 from ref 55. DMZs were synthesized as below. The rest of compounds are commercially available.

## 2. Synthesis and characterization of diminazenes (DMZ)

### Reaction schemes and DMZ structures

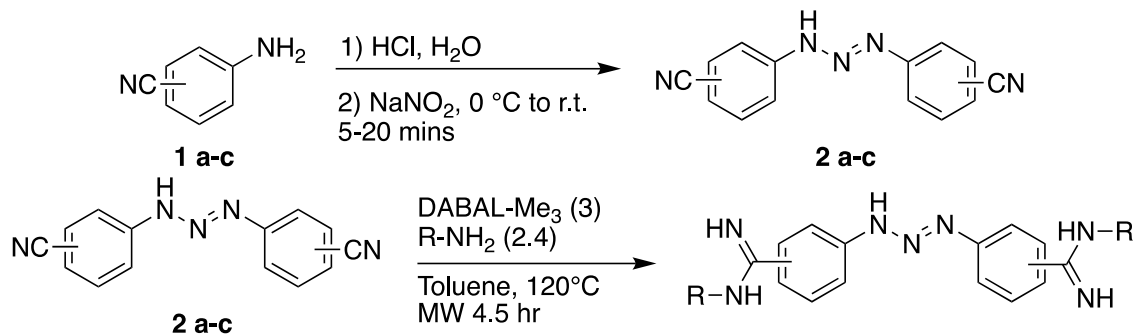

**Scheme S1.** Synthetic routes for DMZ compounds

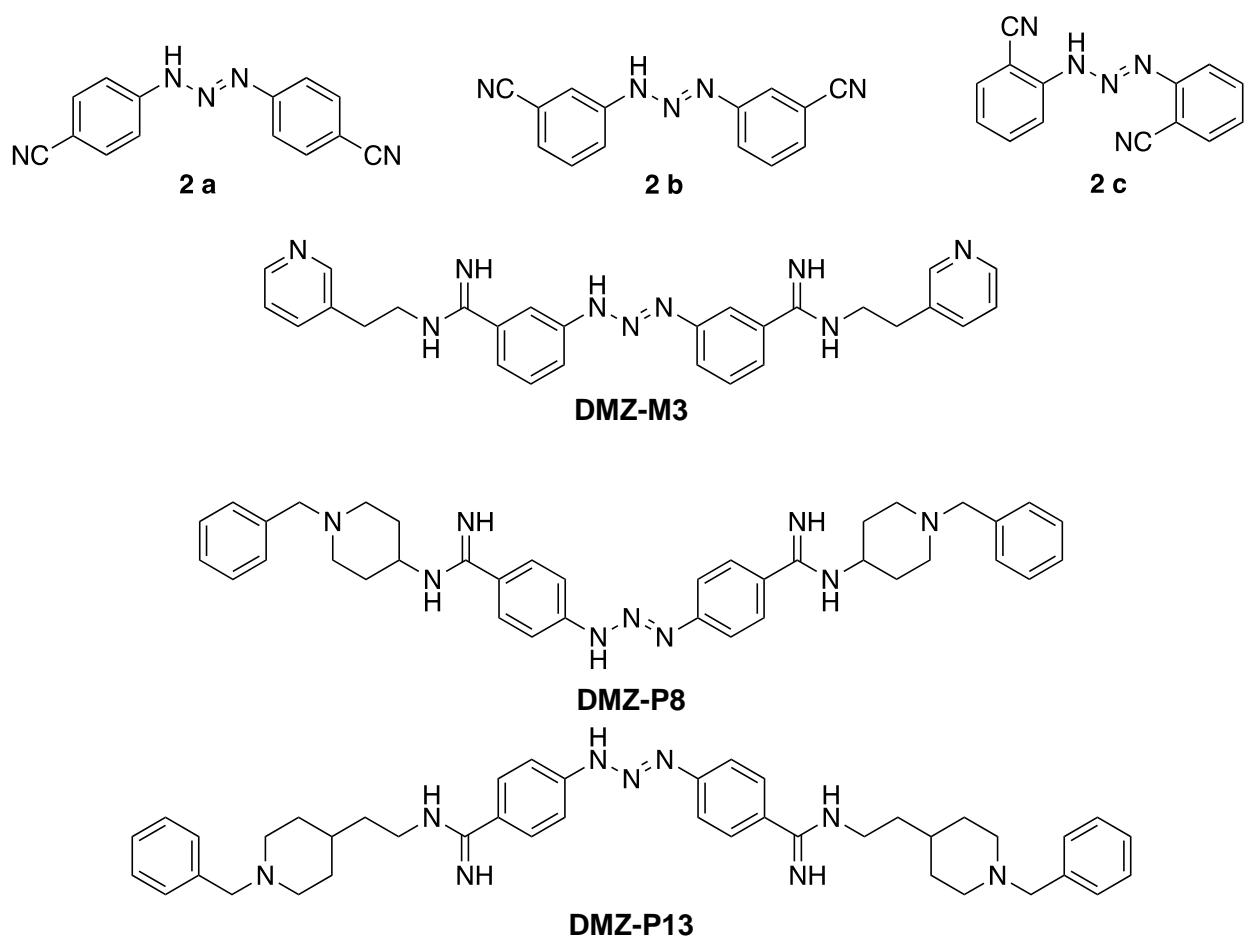

**Figure S8.** Chemical structures of DMZ synthetic intermediates and three DMZs used in this work



## Characterization spectra

- DMZ M3

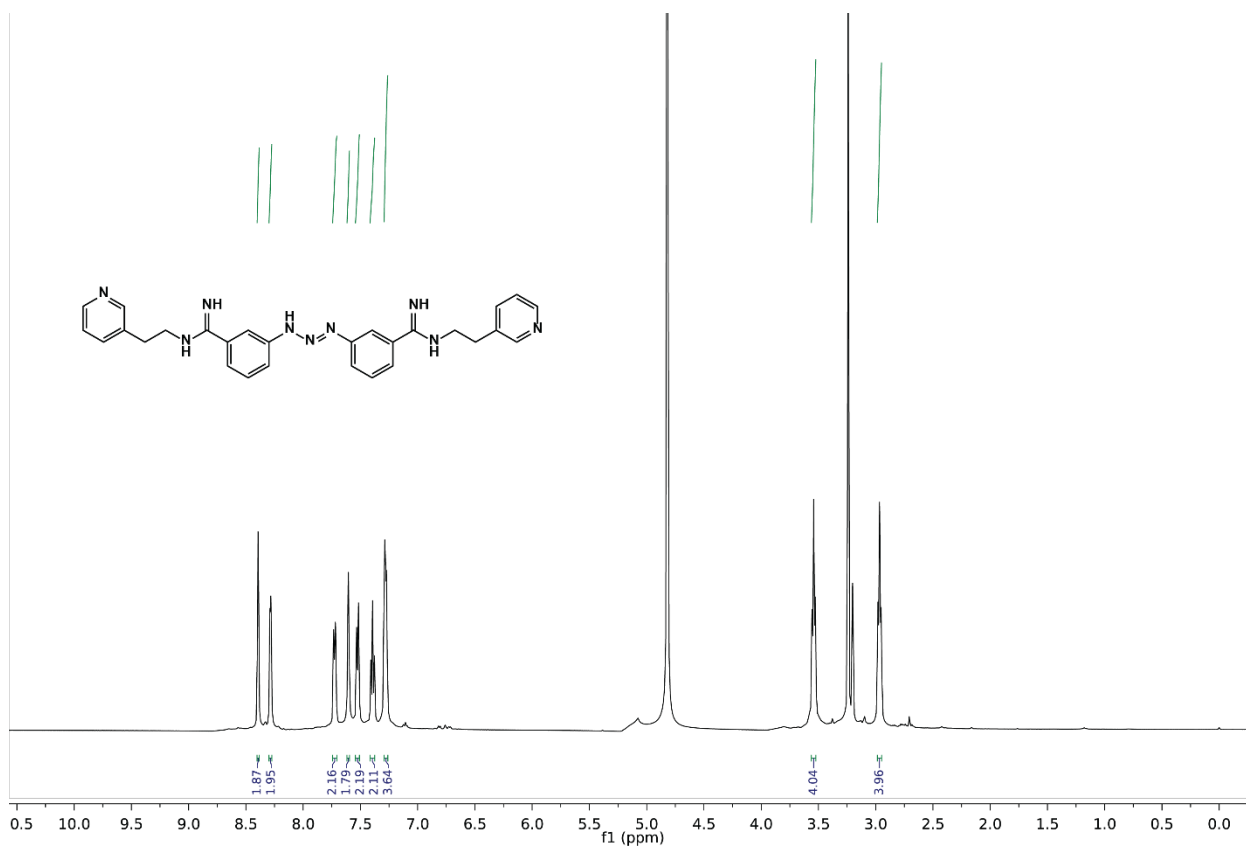

Figure S9 A. The <sup>1</sup>H-NMR spectrum of DMZ m3

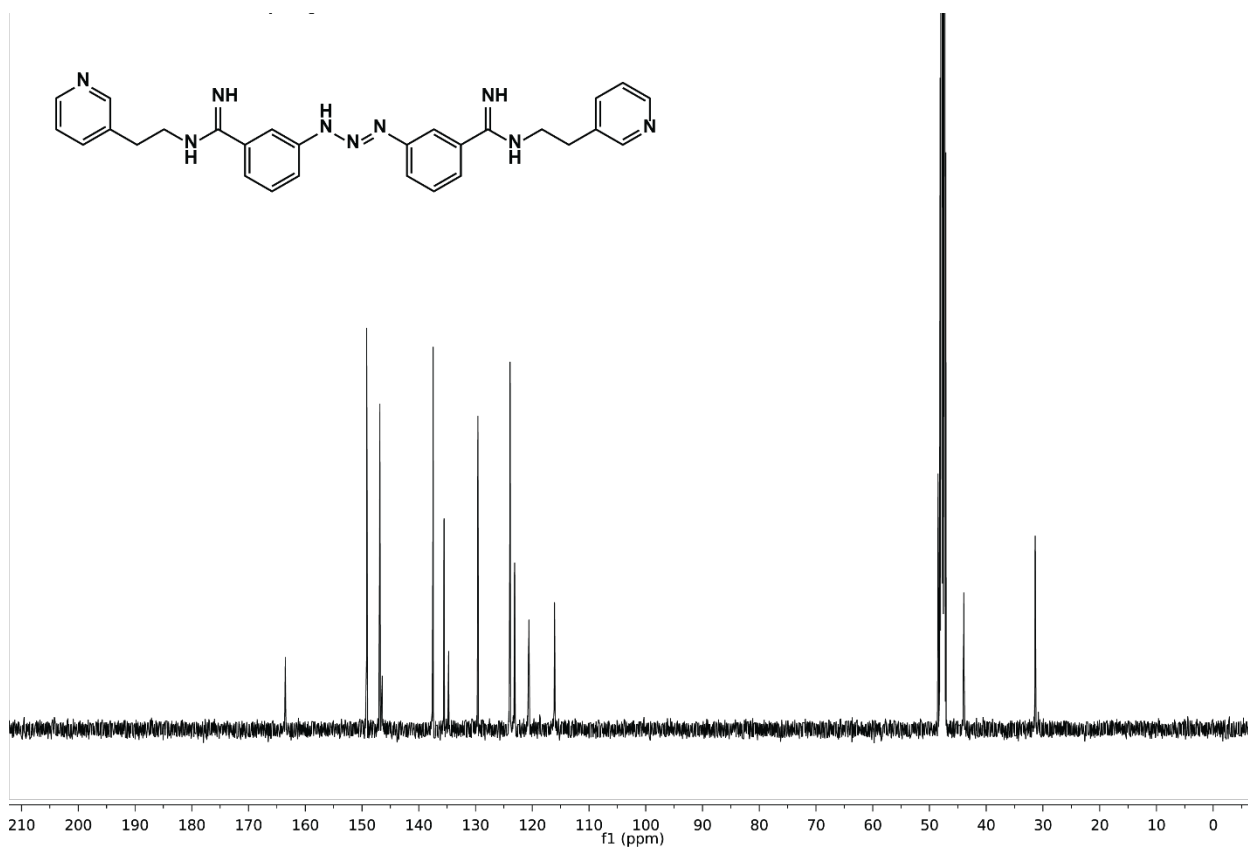

**Figure S9 B.** The <sup>13</sup>C-NMR spectrum of DMZ m3

### <Sample Information>

Sample Name : DMZ-M3  
Sample ID : DMZ-M3  
Data Filename : DMZ-M3.lcd  
Method Filename : GP short-Grd10-90\_22min\_PDA.lcm  
Batch Filename : 10282020\_MSCHECK.lcb  
Vial # : 1-8  
Injection Volume : 10 uL  
Date Acquired : 10/28/2020 10:06:30 PM  
Date Processed : 10/28/2020 10:28:33 PM  
Sample Type : Unknown  
Acquired by : chemist  
Processed by : chemist

### <Chromatogram>

mAU

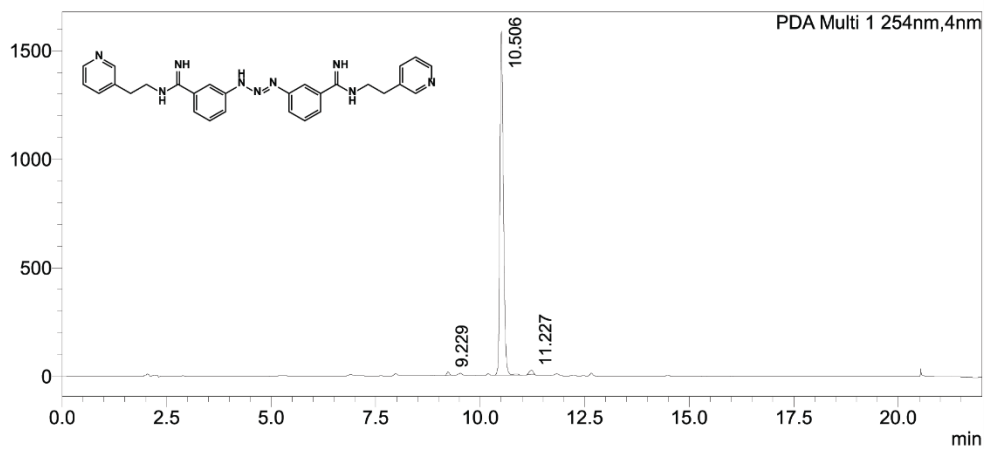

### <Peak Table>

RF-20A Ex:350nm,Em:450nm

| Peak# | Ret. Time | Area% |
|-------|-----------|-------|
| Total |           |       |

PDA Ch1 254nm

| Peak# | Ret. Time | Area%   |
|-------|-----------|---------|
| 1     | 9.229     | 0.653   |
| 2     | 10.506    | 98.114  |
| 3     | 11.227    | 1.234   |
| Total |           | 100.000 |

Figure S9 C. The HPLC spectrum of DMZ m3

- DMZ P8

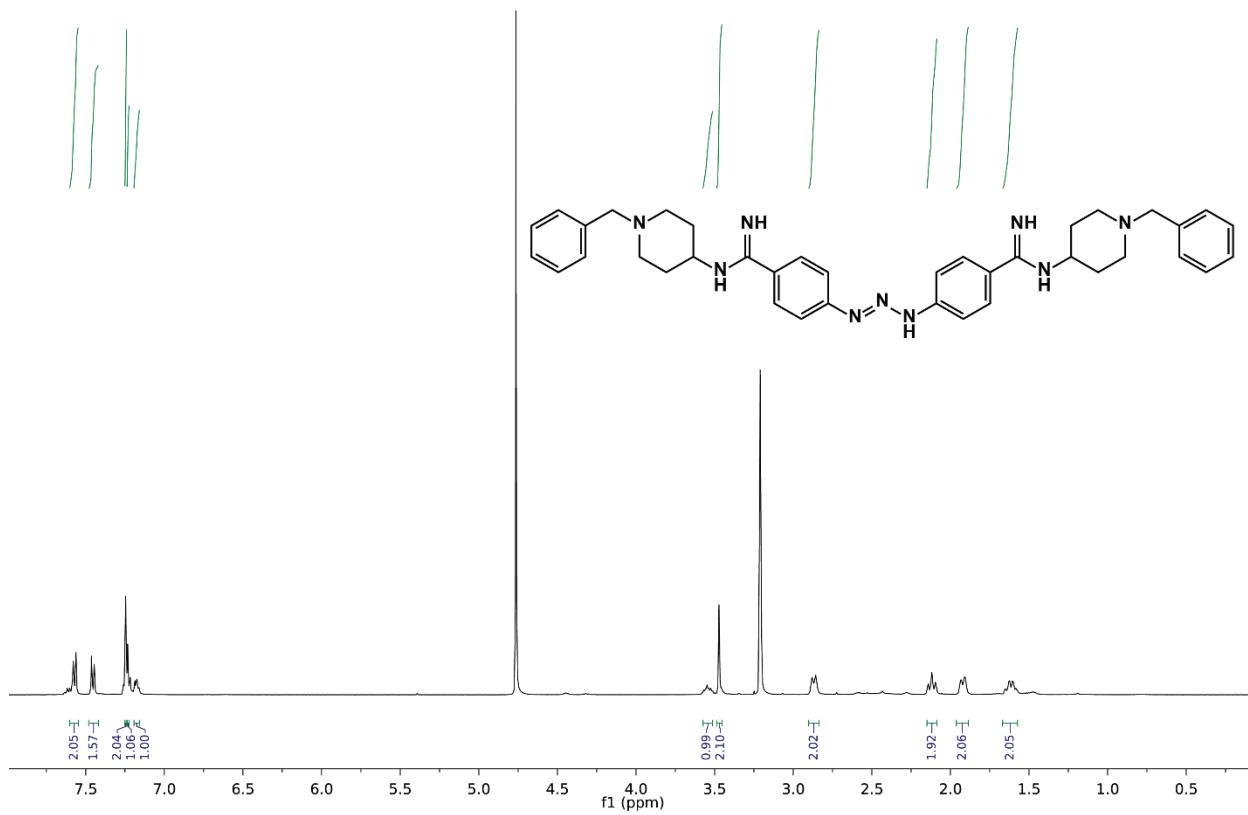

Figure S10 A. The <sup>1</sup>H-NMR spectrum of DMZ p8

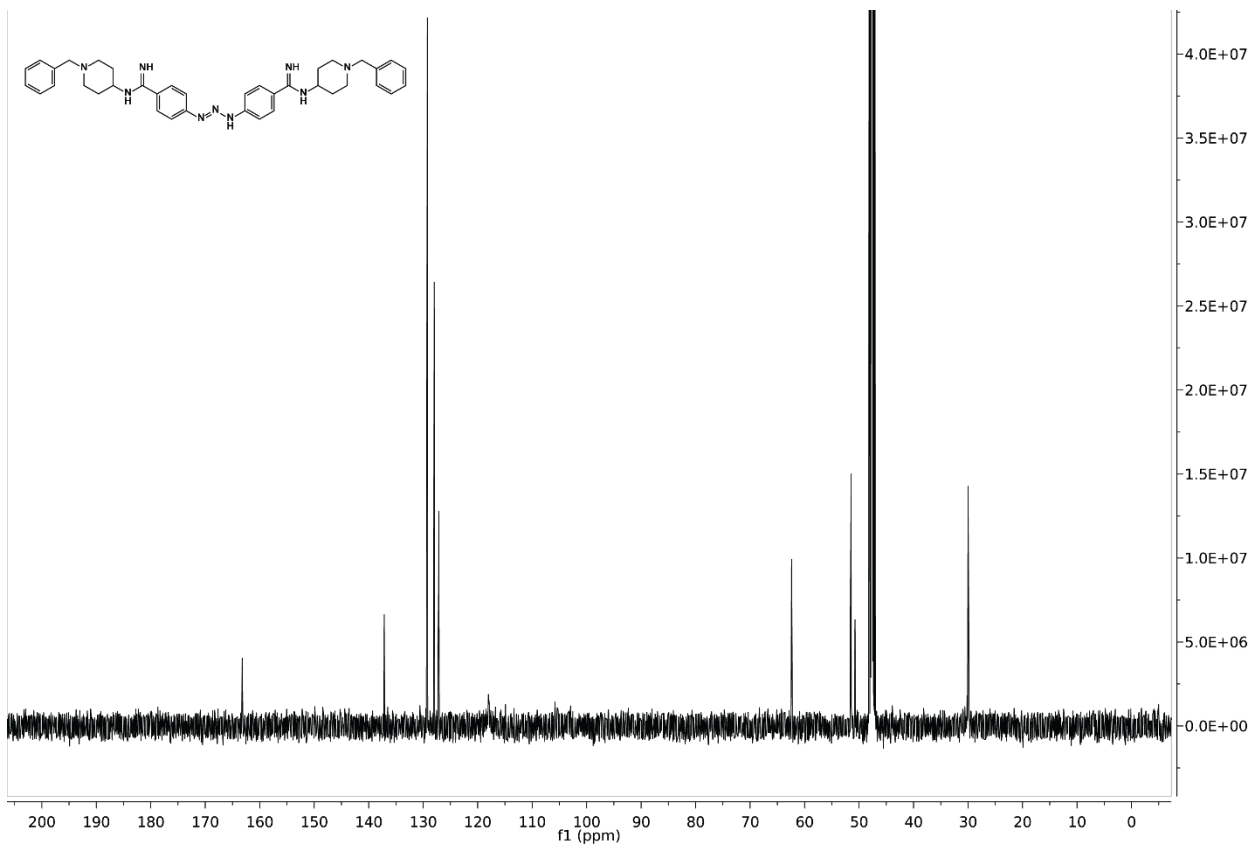

**Figure S10 B.** The <sup>13</sup>C-NMR spectrum of DMZ p8

### <Sample Information>

Sample Name : MZ-06-14-19\_48\_p8  
Sample ID : MZ-06-14-19\_48\_p8  
Data Filename : MZ-06-14-19\_48\_p8.lcd  
Method Filename : GP-MZ\_90ACN\_gradient.lcm  
Batch Filename : 06-14-19\_Berenilrun1.lcb  
Vial # : 1-91  
Injection Volume : 10 uL  
Date Acquired : 6/14/2019 2:42:06 PM  
Date Processed : 6/14/2019 3:17:10 PM  
Sample Type : Unknown  
Acquired by : chemist  
Processed by : chemist

### <Chromatogram>

mAU

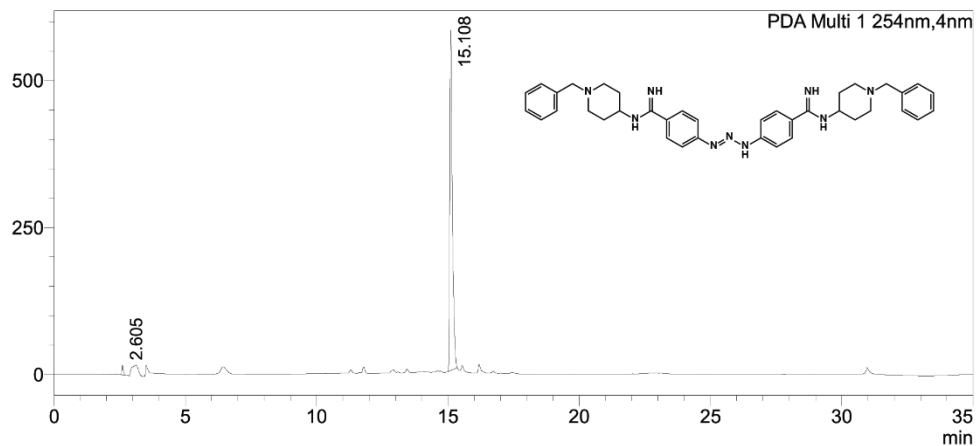

### <Peak Table>

RF-20A Ex:350nm,Em:450nm

| Peak# | Ret. Time | Area% | Height% |
|-------|-----------|-------|---------|
| Total |           |       |         |

PDA Ch1 254nm

| Peak# | Ret. Time | Area%   | Height% |
|-------|-----------|---------|---------|
| 1     | 2.605     | 1.497   | 2.875   |
| 2     | 15.108    | 98.503  | 97.125  |
| Total |           | 100.000 | 100.000 |

Figure S10 C. The HPLC spectrum of DMZ p8

• DMZ P13

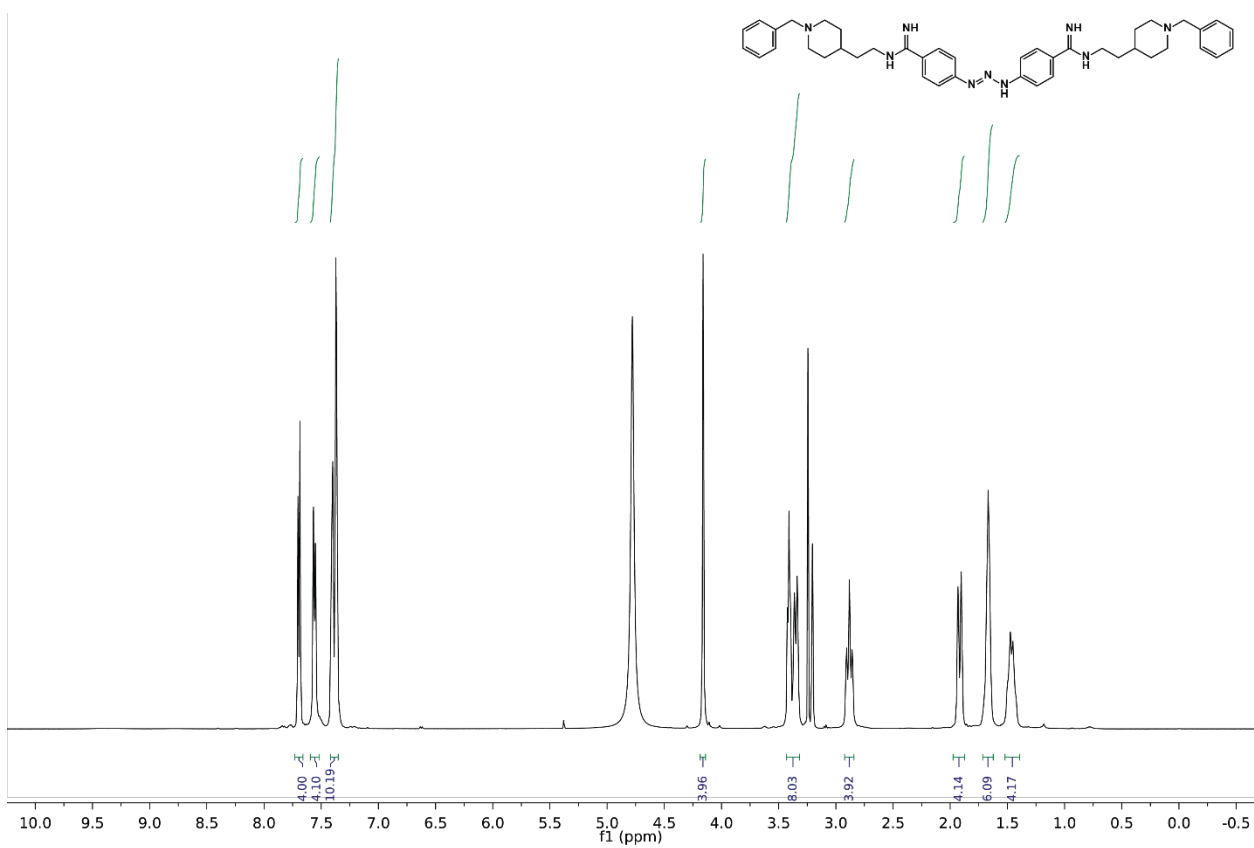

Figure S11 A. The <sup>1</sup>H-NMR spectrum of DMZ p13

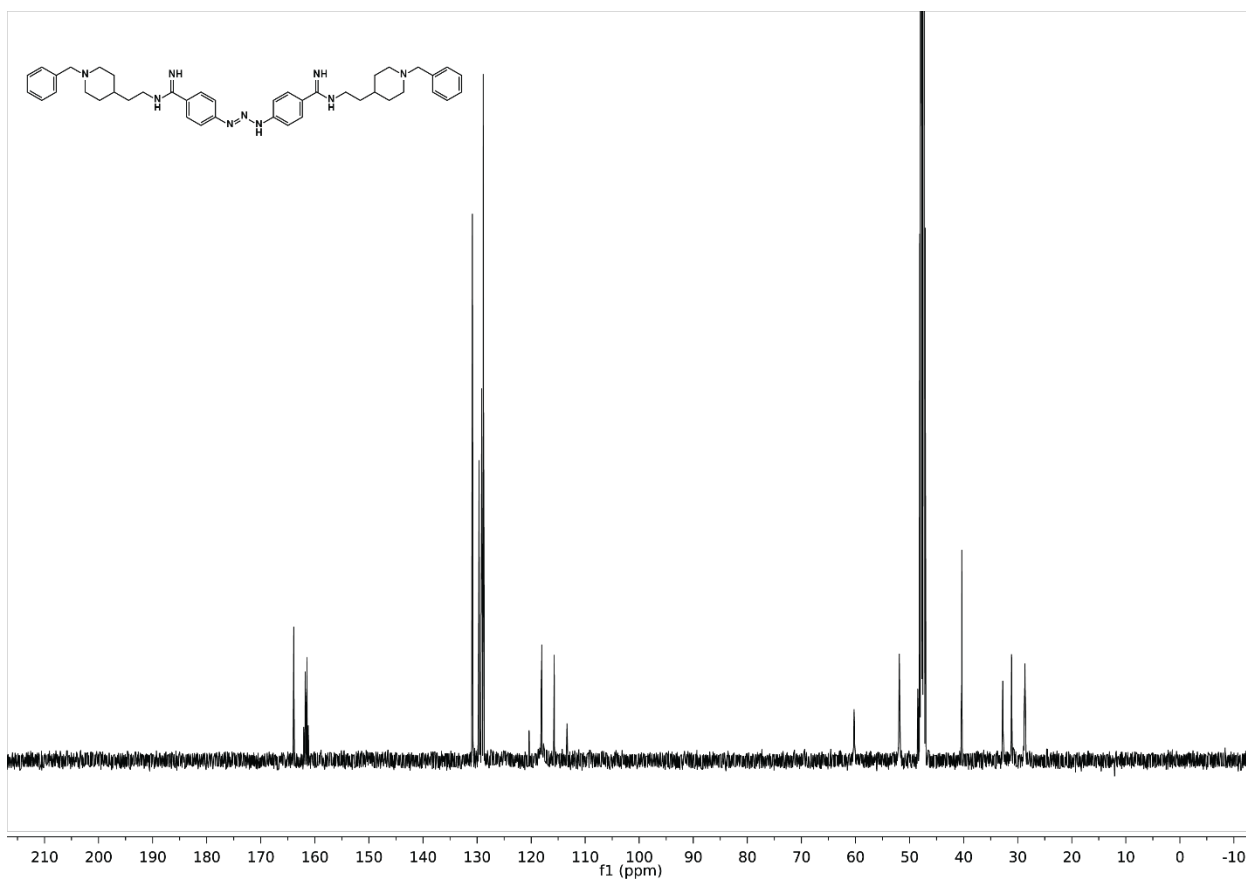

**Figure S11 B.** The <sup>13</sup>C-NMR spectrum of DMZ p13



### <Sample Information>

Sample Name : DMZ-P13  
Sample ID : DMZ-P13  
Data Filename : DMZ-P13.lcd  
Method Filename : GP short-Grd10-90\_22min\_PDA.lcm  
Batch Filename : 10282020\_MSCHECK.lcb  
Vial # : 1-17  
Injection Volume : 10 uL  
Date Acquired : 10/29/2020 1:29:27 AM  
Date Processed : 10/29/2020 1:51:30 AM  
Sample Type : Unknown  
Acquired by : chemist  
Processed by : chemist

### <Chromatogram>

mAU

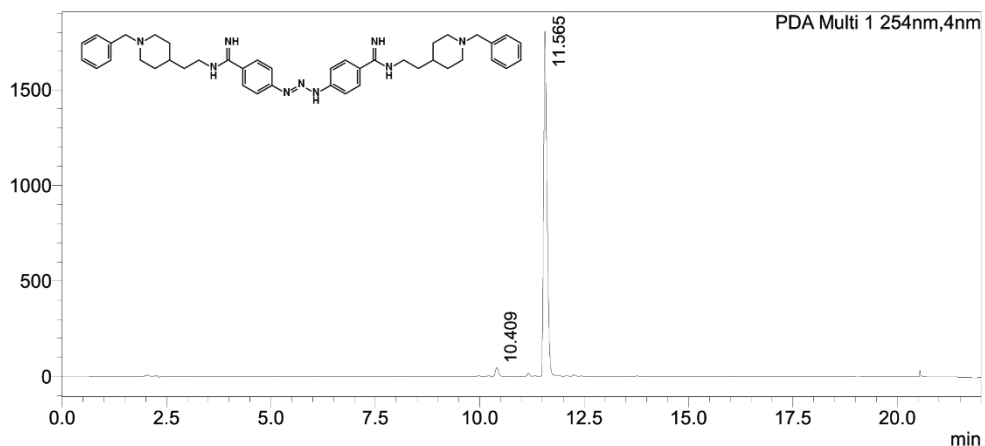

### <Peak Table>

RF-20A Ex:350nm,Em:450nm

| Peak# | Ret. Time | Area% |
|-------|-----------|-------|
| Total |           |       |

PDA Ch1 254nm

| Peak# | Ret. Time | Area%   |
|-------|-----------|---------|
| 1     | 10.409    | 1.689   |
| 2     | 11.565    | 98.311  |
| Total |           | 100.000 |

Figure S11 C. The HPLC spectrum of DMZ p13

## Section C. Surface plasmon resonance

### Sensorgrams, fitting parameters and quality control table

The units for  $k_{on}$ ,  $k_{off}$  and  $K_D$  are  $M^{-1}\cdot s^{-1}$ ,  $s^{-1}$ , and  $M$ , respectively.

- Neomycin

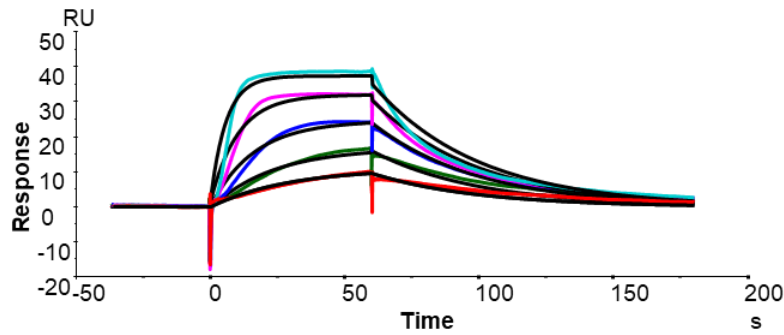

| Curve                     | $k_a$ (1/Ms) | $k_d$ (1/s) | $K_D$ (M) | Rmax (RU) | Conc (M) |
|---------------------------|--------------|-------------|-----------|-----------|----------|
|                           | 2.944E+5     | 0.02529     | 8.589E-8  | 41.22     |          |
| Cycle: 39 0.03125 $\mu$ M |              |             |           |           | 3.125E-8 |
| Cycle: 40 0.0625 $\mu$ M  |              |             |           |           | 6.250E-8 |
| Cycle: 41 0.125 $\mu$ M   |              |             |           |           | 1.250E-7 |
| Cycle: 42 0.25 $\mu$ M    |              |             |           |           | 2.500E-7 |
| Cycle: 43 0.5 $\mu$ M     |              |             |           |           | 5.000E-7 |
| Cycle: 44 0.03125 $\mu$ M |              |             |           |           | 3.125E-8 |

| Quality Control                     | Report                                                                            | Residuals | Parameters |
|-------------------------------------|-----------------------------------------------------------------------------------|-----------|------------|
| <input checked="" type="checkbox"/> | Kinetic constants are within instrument specifications.                           |           |            |
| <input checked="" type="checkbox"/> | Kinetic constants appear to be uniquely determined.                               |           |            |
| <input checked="" type="checkbox"/> | No significant bulk contributions (RI) found.                                     |           |            |
| <input type="checkbox"/>            | Check that sensorgrams have sufficient curvature.                                 |           |            |
| <input type="checkbox"/>            | Examine the residual plot. Pay attention to systematic and non-random deviations. |           |            |

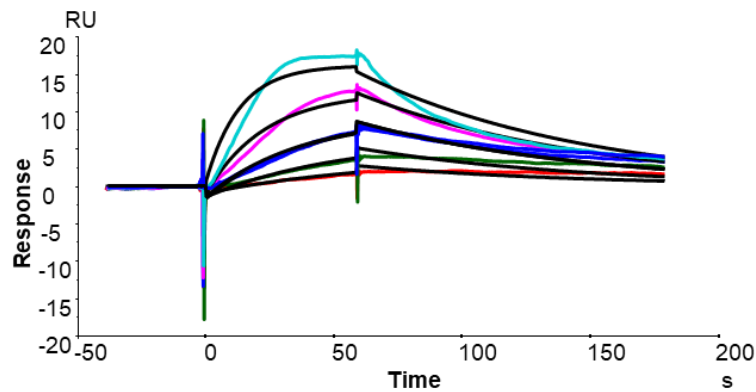

| Curve                    | ka (1/Ms) | kd (1/s) | KD (M)   | Rmax (RU) | Conc (M) |
|--------------------------|-----------|----------|----------|-----------|----------|
|                          | 1.857E+5  | 0.01606  | 8.646E-8 | 71.39     |          |
| Cycle: 2 0.03125 $\mu$ M |           |          |          |           | 3.125E-8 |
| Cycle: 3 0.0625 $\mu$ M  |           |          |          |           | 6.250E-8 |
| Cycle: 4 0.125 $\mu$ M   |           |          |          |           | 1.250E-7 |
| Cycle: 5 0.25 $\mu$ M    |           |          |          |           | 2.500E-7 |
| Cycle: 6 0.5 $\mu$ M     |           |          |          |           | 5.000E-7 |
| Cycle: 7 0.25 $\mu$ M    |           |          |          |           | 2.500E-7 |

| Quality Control                     | Report                                                                            | Residuals | Parameters |
|-------------------------------------|-----------------------------------------------------------------------------------|-----------|------------|
| <input checked="" type="checkbox"/> | Kinetic constants are within instrument specifications.                           |           |            |
| <input checked="" type="checkbox"/> | Kinetic constants appear to be uniquely determined.                               |           |            |
| <input type="checkbox"/>            | High bulk contributions (RI) found.                                               |           |            |
| <input type="checkbox"/>            | Check that sensorgrams have sufficient curvature.                                 |           |            |
| <input type="checkbox"/>            | Examine the residual plot. Pay attention to systematic and non-random deviations. |           |            |

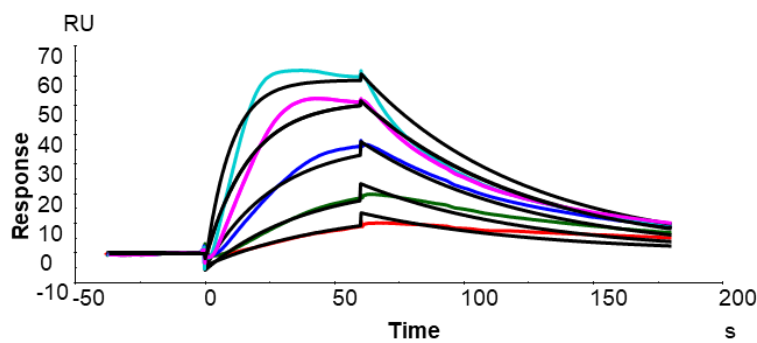

| Curve                    | ka (1/Ms) | kd (1/s) | KD (M)   | Rmax (RU) | Conc (M) |
|--------------------------|-----------|----------|----------|-----------|----------|
|                          | 1.307E+5  | 0.01117  | 8.545E-8 | 18.20     |          |
| Cycle: 2 0.03125 $\mu$ M |           |          |          |           | 3.125E-8 |
| Cycle: 3 0.0625 $\mu$ M  |           |          |          |           | 6.250E-8 |
| Cycle: 4 0.125 $\mu$ M   |           |          |          |           | 1.250E-7 |
| Cycle: 5 0.25 $\mu$ M    |           |          |          |           | 2.500E-7 |
| Cycle: 6 0.5 $\mu$ M     |           |          |          |           | 5.000E-7 |
| Cycle: 7 0.125 $\mu$ M   |           |          |          |           | 1.250E-7 |

| Quality Control                     | Report                                                                            | Residuals | Parameters |
|-------------------------------------|-----------------------------------------------------------------------------------|-----------|------------|
| <input checked="" type="checkbox"/> | Kinetic constants are within instrument specifications.                           |           |            |
| <input checked="" type="checkbox"/> | Kinetic constants appear to be uniquely determined.                               |           |            |
| <input type="checkbox"/>            | High bulk contributions (RI) found.                                               |           |            |
| <input type="checkbox"/>            | Check that sensorgrams have sufficient curvature.                                 |           |            |
| <input type="checkbox"/>            | Examine the residual plot. Pay attention to systematic and non-random deviations. |           |            |

**Figure S12.** The SPR sensorgrams, fitting parameters and quality control table of neomycin (3 replicates)

- Paromomycin

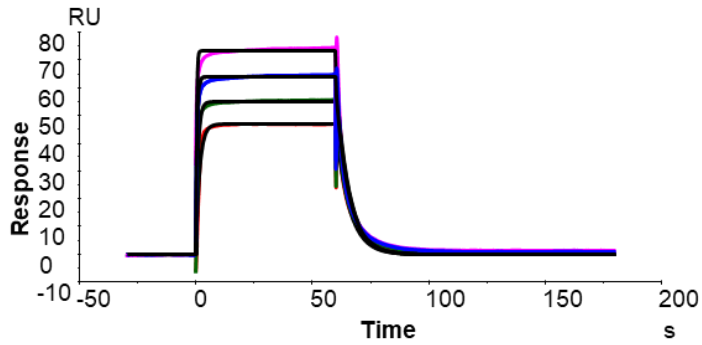

| Curve                  | ka (1/Ms) | kd (1/s) | KD (M)   | Rmax (RU) | Conc (M) |
|------------------------|-----------|----------|----------|-----------|----------|
|                        | 1.160E+5  | 0.1787   | 1.540E-6 | 65.55     |          |
| Cycle: 41 3.75 $\mu$ M |           |          |          |           | 3.750E-6 |
| Cycle: 42 7.5 $\mu$ M  |           |          |          |           | 7.500E-6 |
| Cycle: 43 15 $\mu$ M   |           |          |          |           | 1.500E-5 |
| Cycle: 44 30 $\mu$ M   |           |          |          |           | 3.000E-5 |
| Cycle: 45 15 $\mu$ M   |           |          |          |           | 1.500E-5 |

| Quality Control                     | Report                                                                            | Residuals | Parameters |
|-------------------------------------|-----------------------------------------------------------------------------------|-----------|------------|
| <input checked="" type="checkbox"/> | Kinetic constants are within instrument specifications.                           |           |            |
| <input checked="" type="checkbox"/> | Kinetic constants appear to be uniquely determined.                               |           |            |
| <input type="checkbox"/>            | High bulk contributions (RI) found.                                               |           |            |
| <input type="checkbox"/>            | Check that sensorgrams have sufficient curvature.                                 |           |            |
| <input type="checkbox"/>            | Examine the residual plot. Pay attention to systematic and non-random deviations. |           |            |

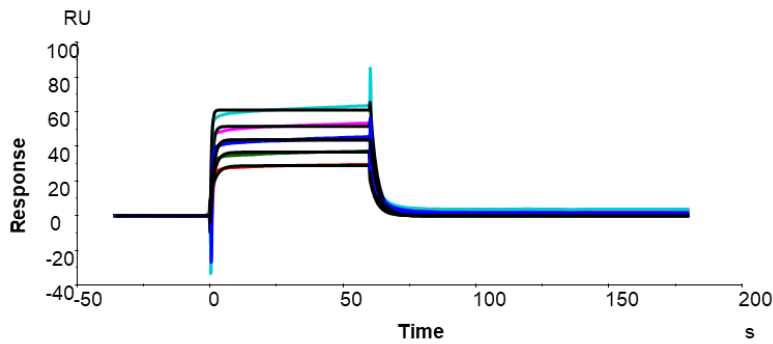

| Curve                  | ka (1/Ms) | kd (1/s) | KD (M)   | Rmax (RU) | Conc (M) |
|------------------------|-----------|----------|----------|-----------|----------|
|                        | 6.385E+4  | 0.3724   | 5.833E-6 | 83.83     |          |
| Cycle: 9 1.875 $\mu$ M |           |          |          |           | 1.875E-6 |
| Cycle: 10 3.75 $\mu$ M |           |          |          |           | 3.750E-6 |
| Cycle: 11 7.5 $\mu$ M  |           |          |          |           | 7.500E-6 |
| Cycle: 12 15 $\mu$ M   |           |          |          |           | 1.500E-5 |
| Cycle: 13 30 $\mu$ M   |           |          |          |           | 3.000E-5 |
| Cycle: 14 7.5 $\mu$ M  |           |          |          |           | 7.500E-6 |

| Quality Control | Report                                                                                   | Residuals | Parameters |
|-----------------|------------------------------------------------------------------------------------------|-----------|------------|
| ⚠               | Kinetic constant $k_d$ is approaching the limits that can be measured by the instrument. |           |            |
| ✅               | Kinetic constants appear to be uniquely determined.                                      |           |            |
| ⚠               | High bulk contributions (R) found.                                                       |           |            |
| ➡               | Check that sensorgrams have sufficient curvature.                                        |           |            |
| ➡               | Examine the residual plot. Pay attention to systematic and non-random deviations.        |           |            |

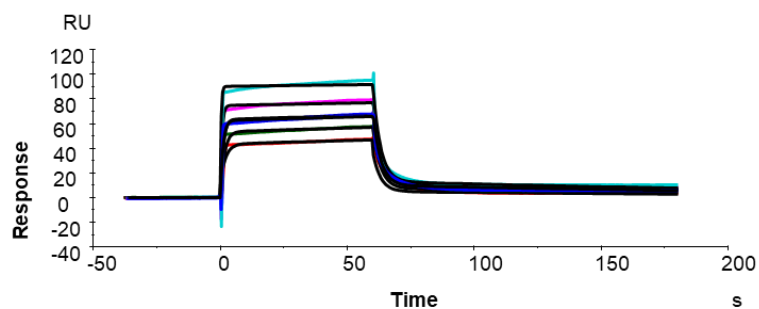

(Two state fitting, 1:1 binding fitting is poor)

| Curve                  | $ka1$ (1/Ms) | $SE(ka1)$ | $kd1$ (1/s) | $SE(kd1)$ | $ka2$ (1/s) | $SE(ka2)$ | $kd2$ (1/s) | $SE(kd2)$ |
|------------------------|--------------|-----------|-------------|-----------|-------------|-----------|-------------|-----------|
|                        | 9.248E+4     | 1.0E+3    | 0.3348      | 0.0023    | 0.002836    | 3.3E-5    | 0.004446    | 1.2E-4    |
| Cycle: 2 1.875 $\mu$ M |              |           |             |           |             |           |             |           |
| Cycle: 3 3.75 $\mu$ M  |              |           |             |           |             |           |             |           |
| Cycle: 4 7.5 $\mu$ M   |              |           |             |           |             |           |             |           |
| Cycle: 5 15 $\mu$ M    |              |           |             |           |             |           |             |           |
| Cycle: 6 30 $\mu$ M    |              |           |             |           |             |           |             |           |
| Cycle: 7 7.5 $\mu$ M   |              |           |             |           |             |           |             |           |

**Figure S13.** The SPR sensorgrams, fitting parameters and quality control table of paromomycin (3 replicates)

- Sisomycin

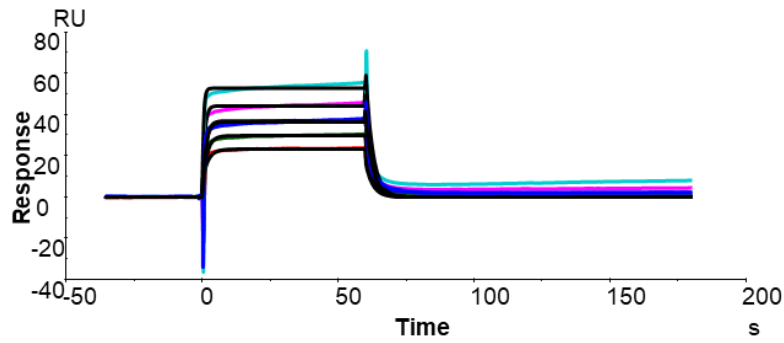

| Curve                   | ka (1/Ms) | kd (1/s) | KD (M)   | Rmax (RU) | Conc (M) |
|-------------------------|-----------|----------|----------|-----------|----------|
|                         | 5.869E+4  | 0.3859   | 6.576E-6 | 77.62     |          |
| Cycle: 16 1.875 $\mu$ M |           |          |          |           | 1.875E-6 |
| Cycle: 17 3.75 $\mu$ M  |           |          |          |           | 3.750E-6 |
| Cycle: 18 7.5 $\mu$ M   |           |          |          |           | 7.500E-6 |
| Cycle: 19 15 $\mu$ M    |           |          |          |           | 1.500E-5 |
| Cycle: 20 30 $\mu$ M    |           |          |          |           | 3.000E-5 |
| Cycle: 21 7.5 $\mu$ M   |           |          |          |           | 7.500E-6 |

| Quality Control | Report                                                                                | Residuals | Parameters |
|-----------------|---------------------------------------------------------------------------------------|-----------|------------|
| ⚠               | Kinetic constant kd is approaching the limits that can be measured by the instrument. |           |            |
| ✅               | Kinetic constants appear to be uniquely determined.                                   |           |            |
| ⚠               | High bulk contributions (RI) found.                                                   |           |            |
| ⬇               | Check that sensorgrams have sufficient curvature.                                     |           |            |
| ⬇               | Examine the residual plot. Pay attention to systematic and non-random deviations.     |           |            |

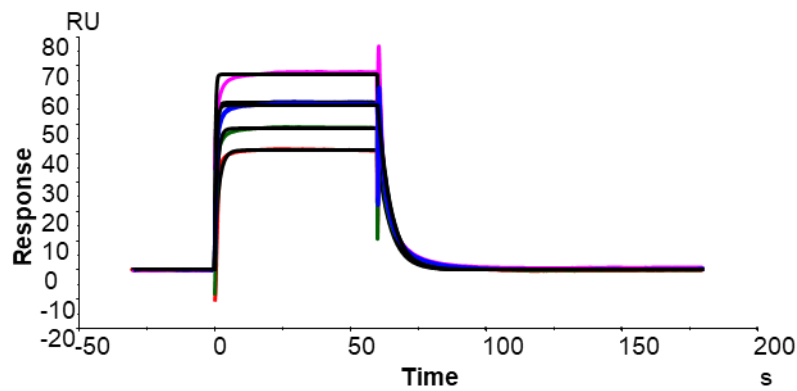

| Curve                  | ka (1/Ms) | kd (1/s) | KD (M)   | Rmax (RU) | Conc (M) |
|------------------------|-----------|----------|----------|-----------|----------|
|                        | 1.099E+5  | 0.2097   | 1.908E-6 | 62.84     |          |
| Cycle: 23 3.75 $\mu$ M |           |          |          |           | 3.750E-6 |
| Cycle: 24 7.5 $\mu$ M  |           |          |          |           | 7.500E-6 |
| Cycle: 25 15 $\mu$ M   |           |          |          |           | 1.500E-5 |
| Cycle: 26 30 $\mu$ M   |           |          |          |           | 3.000E-5 |
| Cycle: 27 15 $\mu$ M   |           |          |          |           | 1.500E-5 |

Quality Control Report Residuals Parameters

|                                     |                                                                                   |
|-------------------------------------|-----------------------------------------------------------------------------------|
| <input checked="" type="checkbox"/> | Kinetic constants are within instrument specifications.                           |
| <input checked="" type="checkbox"/> | Kinetic constants appear to be uniquely determined.                               |
| <input type="checkbox"/>            | High bulk contributions (Ri) found.                                               |
| <input type="checkbox"/>            | Check that sensorgrams have sufficient curvature.                                 |
| <input type="checkbox"/>            | Examine the residual plot. Pay attention to systematic and non-random deviations. |

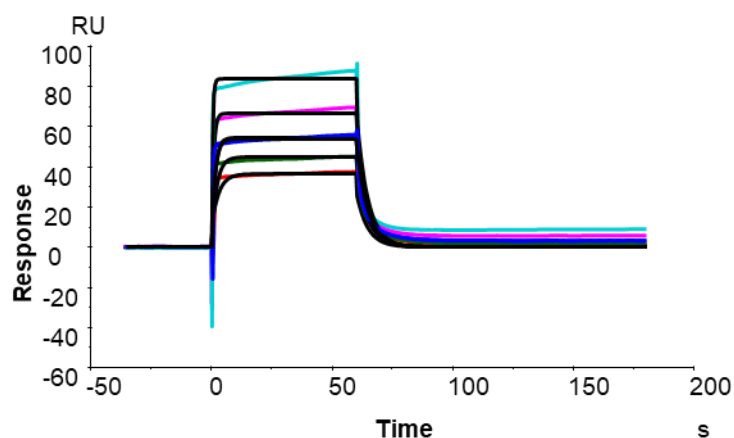

Quality Control Report Residuals Parameters

| Curve                  | ka (1/Ms) | kd (1/s) | KD (M)   | Rmax (RU) | Conc (M) |
|------------------------|-----------|----------|----------|-----------|----------|
|                        | 6.700E+4  | 0.2181   | 3.255E-6 | 73.86     |          |
| Cycle: 9 1.875 $\mu$ M |           |          |          |           | 1.875E-6 |
| Cycle: 10 3.75 $\mu$ M |           |          |          |           | 3.750E-6 |
| Cycle: 11 7.5 $\mu$ M  |           |          |          |           | 7.500E-6 |
| Cycle: 12 15 $\mu$ M   |           |          |          |           | 1.500E-5 |
| Cycle: 13 30 $\mu$ M   |           |          |          |           | 3.000E-5 |
| Cycle: 14 7.5 $\mu$ M  |           |          |          |           | 7.500E-6 |

Quality Control Report Residuals Parameters

|                                     |                                                                                   |
|-------------------------------------|-----------------------------------------------------------------------------------|
| <input checked="" type="checkbox"/> | Kinetic constants are within instrument specifications.                           |
| <input checked="" type="checkbox"/> | Kinetic constants appear to be uniquely determined.                               |
| <input type="checkbox"/>            | High bulk contributions (Ri) found.                                               |
| <input type="checkbox"/>            | Check that sensorgrams have sufficient curvature.                                 |
| <input type="checkbox"/>            | Examine the residual plot. Pay attention to systematic and non-random deviations. |

**Figure S14.** The SPR sensorgrams, fitting parameters and quality control table of sisomycin (3 replicates)

- Streptomycin

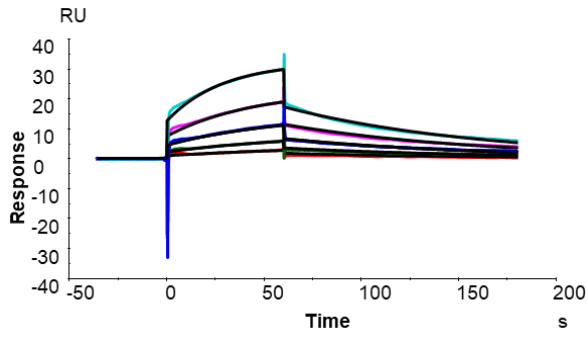

| Curve                   | ka (1/Ms) | kd (1/s) | KD (M)   | Rmax (RU) | Conc (M) |
|-------------------------|-----------|----------|----------|-----------|----------|
|                         | 845.9     | 0.009834 | 1.163E-5 | 27.48     |          |
| Cycle: 23 1.875 $\mu$ M |           |          |          |           | 1.875E-6 |
| Cycle: 24 3.75 $\mu$ M  |           |          |          |           | 3.750E-6 |
| Cycle: 25 7.5 $\mu$ M   |           |          |          |           | 7.500E-6 |
| Cycle: 26 15 $\mu$ M    |           |          |          |           | 1.500E-5 |
| Cycle: 27 30 $\mu$ M    |           |          |          |           | 3.000E-5 |
| Cycle: 28 7.5 $\mu$ M   |           |          |          |           | 7.500E-6 |

| Quality Control | Report                                                                                | Residuals | Parameters |
|-----------------|---------------------------------------------------------------------------------------|-----------|------------|
| ⚠               | Kinetic constant ka is approaching the limits that can be measured by the instrument. |           |            |
| ✓               | Kinetic constants appear to be uniquely determined.                                   |           |            |
| ⚠               | High bulk contributions (RI) found.                                                   |           |            |
| ➡               | Check that sensorgrams have sufficient curvature.                                     |           |            |
| ➡               | Examine the residual plot. Pay attention to systematic and non-random deviations.     |           |            |

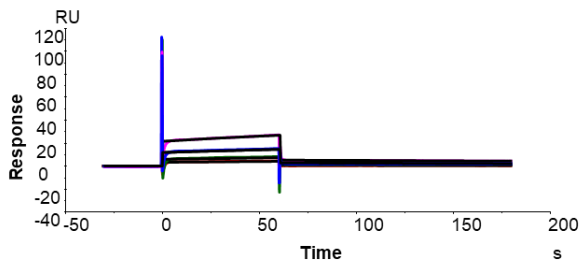

| Curve                  | ka (1/Ms) | kd (1/s) | KD (M)   | Rmax (RU) | Conc (M) |
|------------------------|-----------|----------|----------|-----------|----------|
|                        | 158.4     | 0.001721 | 1.086E-5 | 22.30     |          |
| Cycle: 35 3.75 $\mu$ M |           |          |          |           | 3.750E-6 |
| Cycle: 36 7.5 $\mu$ M  |           |          |          |           | 7.500E-6 |
| Cycle: 37 15 $\mu$ M   |           |          |          |           | 1.500E-5 |
| Cycle: 38 30 $\mu$ M   |           |          |          |           | 3.000E-5 |
| Cycle: 39 15 $\mu$ M   |           |          |          |           | 1.500E-5 |

| Quality Control | Report                                                                                | Residuals | Parameters |
|-----------------|---------------------------------------------------------------------------------------|-----------|------------|
| ✗               | Kinetic constant ka is outside the limits that can be measured by the instrument.     |           |            |
| ✗               | Kinetic constants cannot be uniquely determined. Try to extend the dissociation time. |           |            |
| ⚠               | High bulk contributions (RI) found.                                                   |           |            |
| ➡               | Check that sensorgrams have sufficient curvature.                                     |           |            |
| ➡               | Examine the residual plot. Pay attention to systematic and non-random deviations.     |           |            |



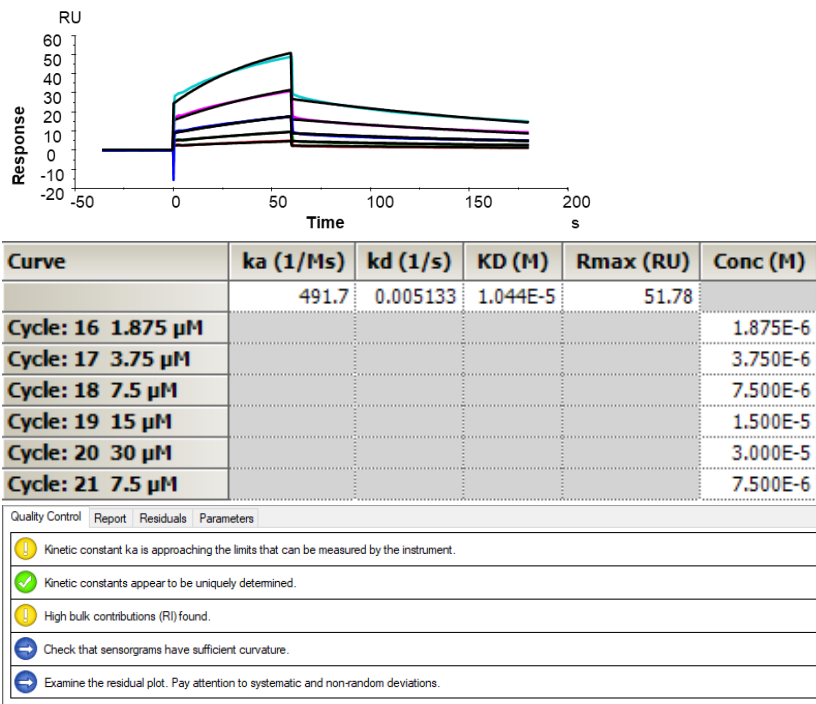

**Figure S15.** The SPR sensorgrams, fitting parameters and quality control table of streptomycin (3 replicates)

- Tobramycin

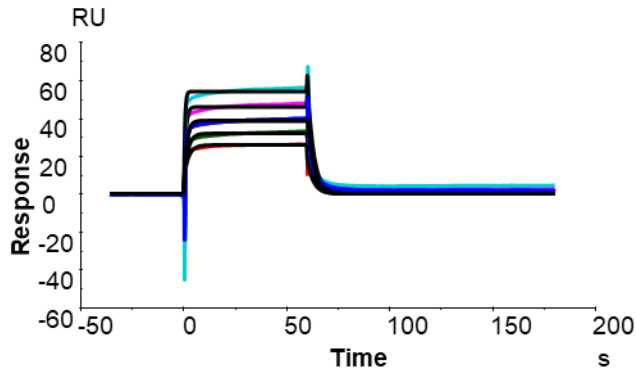

| Curve              | ka (1/Ms) | kd (1/s) | KD (M)   | Rmax (RU) | Conc (M) |
|--------------------|-----------|----------|----------|-----------|----------|
|                    | 5.855E+4  | 0.3347   | 5.717E-6 | 74.82     |          |
| Cycle: 30 1.875 µM |           |          |          |           | 1.875E-6 |
| Cycle: 31 3.75 µM  |           |          |          |           | 3.750E-6 |
| Cycle: 32 7.5 µM   |           |          |          |           | 7.500E-6 |
| Cycle: 33 15 µM    |           |          |          |           | 1.500E-5 |
| Cycle: 34 30 µM    |           |          |          |           | 3.000E-5 |
| Cycle: 35 7.5 µM   |           |          |          |           | 7.500E-6 |

| Quality Control | Report                                                                                | Residuals | Parameters |
|-----------------|---------------------------------------------------------------------------------------|-----------|------------|
| ⚠               | Kinetic constant kd is approaching the limits that can be measured by the instrument. |           |            |
| ✅               | Kinetic constants appear to be uniquely determined.                                   |           |            |
| ⚠               | High bulk contributions (RI) found.                                                   |           |            |
| ⬇               | Check that sensorgrams have sufficient curvature.                                     |           |            |
| ⬇               | Examine the residual plot. Pay attention to systematic and non-random deviations.     |           |            |

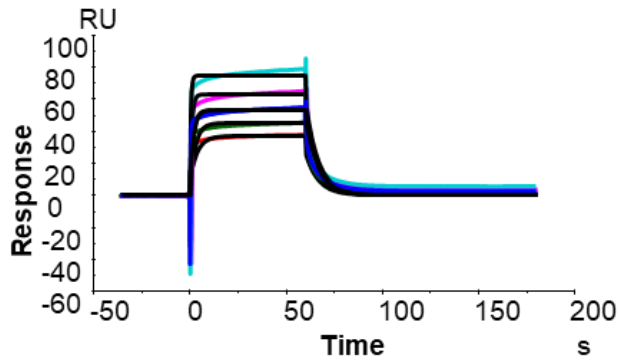

| Curve              | ka (1/Ms) | kd (1/s) | KD (M)   | Rmax (RU) | Conc (M) |
|--------------------|-----------|----------|----------|-----------|----------|
|                    | 5.772E+4  | 0.1532   | 2.654E-6 | 63.32     |          |
| Cycle: 23 1.875 µM |           |          |          |           | 1.875E-6 |
| Cycle: 24 3.75 µM  |           |          |          |           | 3.750E-6 |
| Cycle: 25 7.5 µM   |           |          |          |           | 7.500E-6 |
| Cycle: 26 15 µM    |           |          |          |           | 1.500E-5 |
| Cycle: 27 30 µM    |           |          |          |           | 3.000E-5 |
| Cycle: 28 7.5 µM   |           |          |          |           | 7.500E-6 |

| Quality Control | Report                                                                            | Residuals | Parameters |
|-----------------|-----------------------------------------------------------------------------------|-----------|------------|
| ✓               | Kinetic constants are within instrument specifications.                           |           |            |
| ✓               | Kinetic constants appear to be uniquely determined.                               |           |            |
| !               | High bulk contributions (RI) found.                                               |           |            |
| →               | Check that sensorgrams have sufficient curvature.                                 |           |            |
| →               | Examine the residual plot. Pay attention to systematic and non-random deviations. |           |            |

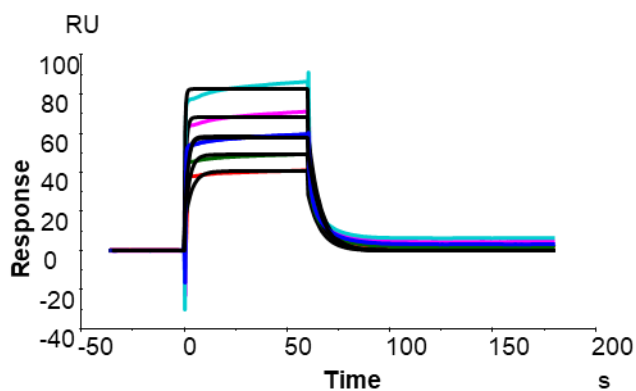

| Curve                                    | $k_a$ (1/Ms) | $k_d$ (1/s) | KD (M)   | Rmax (RU) | Conc (M) |
|------------------------------------------|--------------|-------------|----------|-----------|----------|
|                                          | 7.033E+4     | 0.1603      | 2.279E-6 | 66.09     |          |
| <b>Cycle: 23 1.875 <math>\mu</math>M</b> |              |             |          |           | 1.875E-6 |
| <b>Cycle: 24 3.75 <math>\mu</math>M</b>  |              |             |          |           | 3.750E-6 |
| <b>Cycle: 25 7.5 <math>\mu</math>M</b>   |              |             |          |           | 7.500E-6 |
| <b>Cycle: 26 15 <math>\mu</math>M</b>    |              |             |          |           | 1.500E-5 |
| <b>Cycle: 27 30 <math>\mu</math>M</b>    |              |             |          |           | 3.000E-5 |
| <b>Cycle: 28 7.5 <math>\mu</math>M</b>   |              |             |          |           | 7.500E-6 |

| Quality Control | Report                                                                            | Residuals | Parameters |
|-----------------|-----------------------------------------------------------------------------------|-----------|------------|
| ✓               | Kinetic constants are within instrument specifications.                           |           |            |
| ✓               | Kinetic constants appear to be uniquely determined.                               |           |            |
| !               | High bulk contributions (RI) found.                                               |           |            |
| →               | Check that sensorgrams have sufficient curvature.                                 |           |            |
| →               | Examine the residual plot. Pay attention to systematic and non-random deviations. |           |            |

**Figure S16.** The SPR sensorgrams, fitting parameters and quality control table of tobramycin (3 replicates)

- Gentamycin

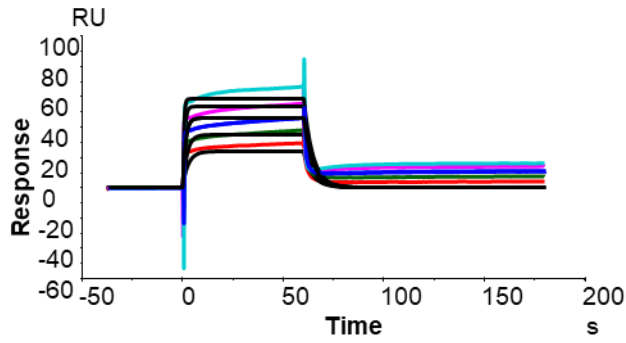

| Curve             | ka (1/Ms) | kd (1/s) | KD (M)   | Rmax (RU) | Conc (M) |
|-------------------|-----------|----------|----------|-----------|----------|
|                   | 6.898E+4  | 0.2231   | 3.235E-6 | 65.40     |          |
| Cycle: 2 1.875 µM |           |          |          |           | 1.875E-6 |
| Cycle: 3 3.75 µM  |           |          |          |           | 3.750E-6 |
| Cycle: 4 7.5 µM   |           |          |          |           | 7.500E-6 |
| Cycle: 5 15 µM    |           |          |          |           | 1.500E-5 |
| Cycle: 6 30 µM    |           |          |          |           | 3.000E-5 |
| Cycle: 7 7.5 µM   |           |          |          |           | 7.500E-6 |

| Quality Control                     | Report | Residuals | Parameters                                                                        |
|-------------------------------------|--------|-----------|-----------------------------------------------------------------------------------|
| <input checked="" type="checkbox"/> |        |           | Kinetic constants are within instrument specifications.                           |
| <input checked="" type="checkbox"/> |        |           | Kinetic constants cannot be uniquely determined.                                  |
| <input type="checkbox"/>            |        |           | Bulk contributions (RI) were not evaluated. The RI parameter is set to constant.  |
| <input type="checkbox"/>            |        |           | Check that sensorgrams have sufficient curvature.                                 |
| <input type="checkbox"/>            |        |           | Examine the residual plot. Pay attention to systematic and non-random deviations. |

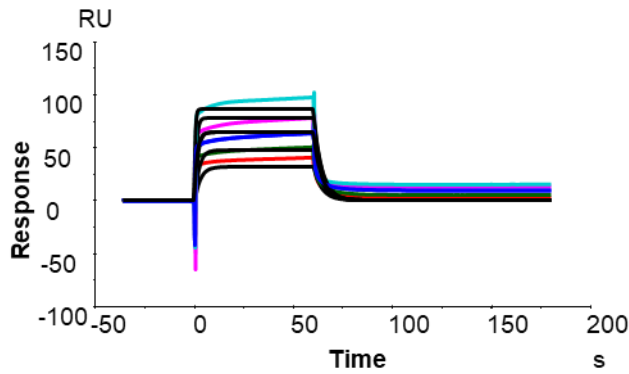

| Curve              | ka (1/Ms) | kd (1/s) | KD (M)   | Rmax (RU) | Conc (M) |
|--------------------|-----------|----------|----------|-----------|----------|
|                    | 6.148E+4  | 0.2648   | 4.307E-6 | 109.5     |          |
| Cycle: 37 1.875 µM |           |          |          |           | 1.875E-6 |
| Cycle: 38 3.75 µM  |           |          |          |           | 3.750E-6 |
| Cycle: 39 7.5 µM   |           |          |          |           | 7.500E-6 |
| Cycle: 40 15 µM    |           |          |          |           | 1.500E-5 |
| Cycle: 41 30 µM    |           |          |          |           | 3.000E-5 |
| Cycle: 42 7.5 µM   |           |          |          |           | 7.500E-6 |

|                 |                                                                                    |           |            |
|-----------------|------------------------------------------------------------------------------------|-----------|------------|
| Quality Control | Report                                                                             | Residuals | Parameters |
| ✓               | Kinetic constants are within instrument specifications.                            |           |            |
| ✗               | Kinetic constants cannot be uniquely determined.<br>Try to immobilize less ligand. |           |            |
| →               | Bulk contributions (RI) were not evaluated. The RI parameter is set to constant.   |           |            |
| →               | Check that sensorgrams have sufficient curvature.                                  |           |            |
| →               | Examine the residual plot. Pay attention to systematic and non-random deviations.  |           |            |

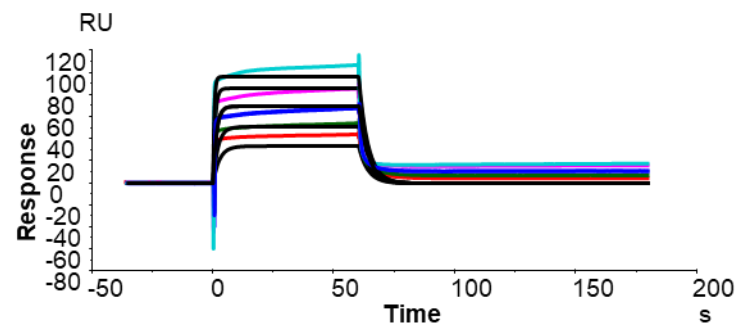

| Curve                     | ka (1/Ms) | kd (1/s) | KD (M)   | Rmax (RU) | Conc (M) |
|---------------------------|-----------|----------|----------|-----------|----------|
|                           | 6.226E+4  | 0.2394   | 3.845E-6 | 97.49     |          |
| <b>Cycle: 37 1.875 µM</b> |           |          |          |           | 1.875E-6 |
| <b>Cycle: 38 3.75 µM</b>  |           |          |          |           | 3.750E-6 |
| <b>Cycle: 39 7.5 µM</b>   |           |          |          |           | 7.500E-6 |
| <b>Cycle: 40 15 µM</b>    |           |          |          |           | 1.500E-5 |
| <b>Cycle: 41 30 µM</b>    |           |          |          |           | 3.000E-5 |
| <b>Cycle: 42 7.5 µM</b>   |           |          |          |           | 7.500E-6 |

|                 |                                                                                   |           |            |
|-----------------|-----------------------------------------------------------------------------------|-----------|------------|
| Quality Control | Report                                                                            | Residuals | Parameters |
| ✓               | Kinetic constants are within instrument specifications.                           |           |            |
| !               | Kinetic constants were difficult to determine.<br>Try to immobilize less ligand.  |           |            |
| →               | Bulk contributions (RI) were not evaluated. The RI parameter is set to constant.  |           |            |
| →               | Check that sensorgrams have sufficient curvature.                                 |           |            |
| →               | Examine the residual plot. Pay attention to systematic and non-random deviations. |           |            |

**Figure S17.** The SPR sensorgrams, fitting parameters and quality control table of gentamycin (3 replicates)

- Neamine

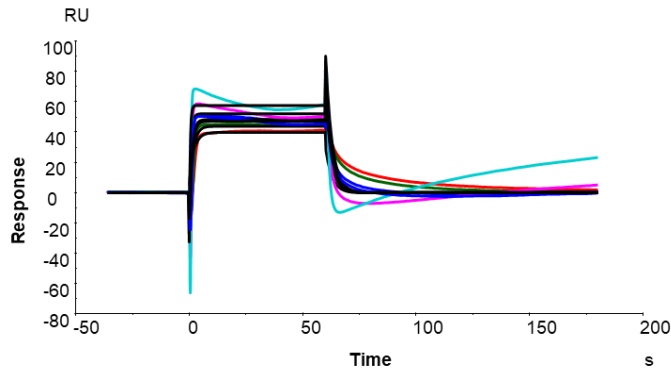

| Curve                  | ka (1/Ms) | kd (1/s) | KD (M)   | Rmax (RU) | Conc (M) |
|------------------------|-----------|----------|----------|-----------|----------|
|                        | 7.407E+4  | 0.3503   | 4.729E-6 | 104.5     |          |
| Cycle: 9 1.875 $\mu$ M |           |          |          |           | 1.875E-6 |
| Cycle: 10 3.75 $\mu$ M |           |          |          |           | 3.750E-6 |
| Cycle: 11 7.5 $\mu$ M  |           |          |          |           | 7.500E-6 |
| Cycle: 12 15 $\mu$ M   |           |          |          |           | 1.500E-5 |
| Cycle: 13 30 $\mu$ M   |           |          |          |           | 3.000E-5 |
| Cycle: 14 7.5 $\mu$ M  |           |          |          |           | 7.500E-6 |

| Quality Control | Report                                                                                | Residuals | Parameters |
|-----------------|---------------------------------------------------------------------------------------|-----------|------------|
| ⚠               | Kinetic constant kd is approaching the limits that can be measured by the instrument. |           |            |
| ✅               | Kinetic constants appear to be uniquely determined.                                   |           |            |
| ⚠               | High bulk contributions (RI) found.                                                   |           |            |
| 🔍               | Check that sensorgrams have sufficient curvature.                                     |           |            |
| 🔍               | Examine the residual plot. Pay attention to systematic and non-random deviations.     |           |            |

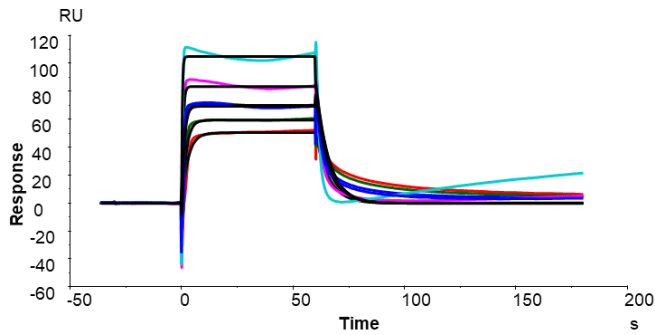

| Curve                   | ka (1/Ms) | kd (1/s) | KD (M)   | Rmax (RU) | Conc (M) |
|-------------------------|-----------|----------|----------|-----------|----------|
|                         | 9.967E+4  | 0.1711   | 1.716E-6 | 95.37     |          |
| Cycle: 23 1.875 $\mu$ M |           |          |          |           | 1.875E-6 |
| Cycle: 24 3.75 $\mu$ M  |           |          |          |           | 3.750E-6 |
| Cycle: 25 7.5 $\mu$ M   |           |          |          |           | 7.500E-6 |
| Cycle: 26 15 $\mu$ M    |           |          |          |           | 1.500E-5 |
| Cycle: 27 30 $\mu$ M    |           |          |          |           | 3.000E-5 |
| Cycle: 28 7.5 $\mu$ M   |           |          |          |           | 7.500E-6 |

| Quality Control | Report                                                                            | Residuals | Parameters |
|-----------------|-----------------------------------------------------------------------------------|-----------|------------|
| ✓               | Kinetic constants are within instrument specifications.                           |           |            |
| ✓               | Kinetic constants appear to be uniquely determined.                               |           |            |
| !               | High bulk contributions (RI) found.                                               |           |            |
| →               | Check that sensorgrams have sufficient curvature.                                 |           |            |
| →               | Examine the residual plot. Pay attention to systematic and non-random deviations. |           |            |

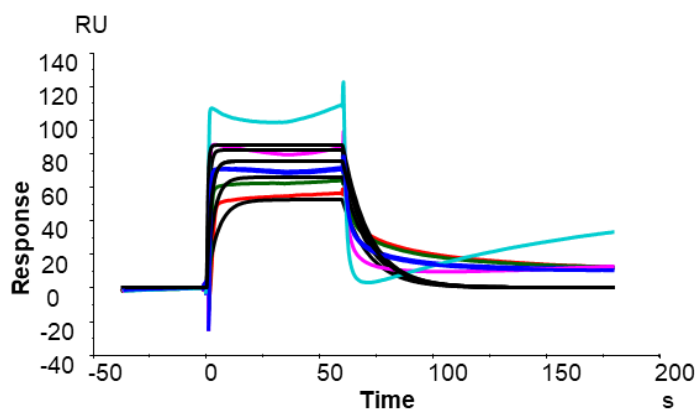

| Curve                    | ka (1/Ms) | kd (1/s) | KD (M)   | Rmax (RU) | Conc (M) |
|--------------------------|-----------|----------|----------|-----------|----------|
|                          | 6.356E+4  | 0.08348  | 1.313E-6 | 89.36     |          |
| <b>Cycle: 2 1.875 µM</b> |           |          |          |           | 1.875E-6 |
| <b>Cycle: 3 3.75 µM</b>  |           |          |          |           | 3.750E-6 |
| <b>Cycle: 4 7.5 µM</b>   |           |          |          |           | 7.500E-6 |
| <b>Cycle: 5 15 µM</b>    |           |          |          |           | 1.500E-5 |
| <b>Cycle: 6 30 µM</b>    |           |          |          |           | 3.000E-5 |
| <b>Cycle: 7 7.5 µM</b>   |           |          |          |           | 7.500E-6 |

| Quality Control | Report                                                                            | Residuals | Parameters |
|-----------------|-----------------------------------------------------------------------------------|-----------|------------|
| ✓               | Kinetic constants are within instrument specifications.                           |           |            |
| !               | Kinetic constants were difficult to determine.<br>Try to immobilize less ligand.  |           |            |
| →               | Bulk contributions (RI) were not evaluated. The RI parameter is set to constant.  |           |            |
| →               | Check that sensorgrams have sufficient curvature.                                 |           |            |
| →               | Examine the residual plot. Pay attention to systematic and non-random deviations. |           |            |

**Figure S18.** The SPR sensorgrams, fitting parameters and quality control table of neamine (3 replicates)

- Kanamycin

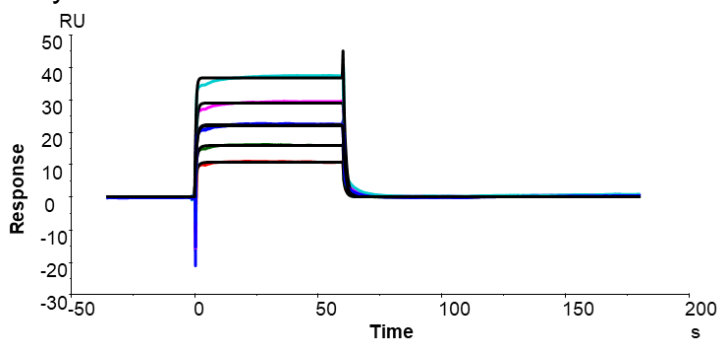

| Curve                   | ka (1/Ms) | kd (1/s) | KD (M)   | Rmax (RU) | Conc (M) |
|-------------------------|-----------|----------|----------|-----------|----------|
|                         | 5.029E+4  | 1.015    | 2.018E-5 | 75.66     |          |
| Cycle: 16 1.875 $\mu$ M |           |          |          |           | 1.875E-6 |
| Cycle: 17 3.75 $\mu$ M  |           |          |          |           | 3.750E-6 |
| Cycle: 18 7.5 $\mu$ M   |           |          |          |           | 7.500E-6 |
| Cycle: 19 15 $\mu$ M    |           |          |          |           | 1.500E-5 |
| Cycle: 20 30 $\mu$ M    |           |          |          |           | 3.000E-5 |
| Cycle: 21 7.5 $\mu$ M   |           |          |          |           | 7.500E-6 |

| Quality Control | Report                                                                                | Residuals | Parameters |
|-----------------|---------------------------------------------------------------------------------------|-----------|------------|
| ⚠               | Kinetic constant kd is approaching the limits that can be measured by the instrument. |           |            |
| ✓               | Kinetic constants appear to be uniquely determined.                                   |           |            |
| ⚠               | High bulk contributions (R) found.                                                    |           |            |
| ➡               | Check that sensorgrams have sufficient curvature.                                     |           |            |
| ➡               | Examine the residual plot. Pay attention to systematic and non-random deviations.     |           |            |

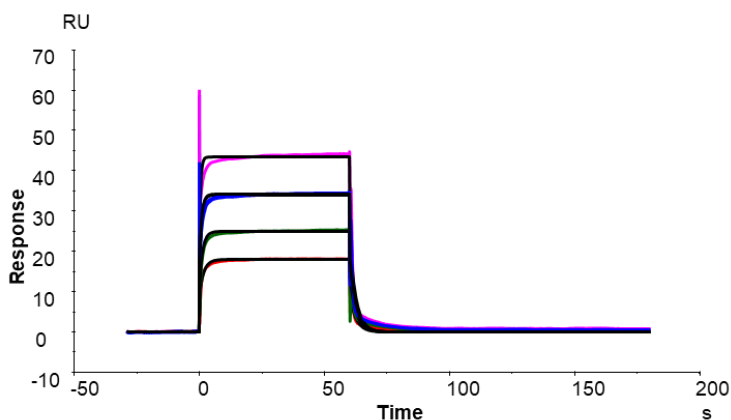

| Curve                  | ka (1/Ms) | kd (1/s) | KD (M)   | Rmax (RU) | Conc (M) |
|------------------------|-----------|----------|----------|-----------|----------|
|                        | 4.892E+4  | 0.4012   | 8.202E-6 | 30.24     |          |
| Cycle: 17 3.75 $\mu$ M |           |          |          |           | 3.750E-6 |
| Cycle: 18 7.5 $\mu$ M  |           |          |          |           | 7.500E-6 |
| Cycle: 19 15 $\mu$ M   |           |          |          |           | 1.500E-5 |
| Cycle: 20 30 $\mu$ M   |           |          |          |           | 3.000E-5 |
| Cycle: 21 15 $\mu$ M   |           |          |          |           | 1.500E-5 |



|                 |                                                                                          |           |            |
|-----------------|------------------------------------------------------------------------------------------|-----------|------------|
| Quality Control | Report                                                                                   | Residuals | Parameters |
| ⚠               | Kinetic constant $k_d$ is approaching the limits that can be measured by the instrument. |           |            |
| ✅               | Kinetic constants appear to be uniquely determined.                                      |           |            |
| ⚠               | High bulk contributions (RI) found.                                                      |           |            |
| ➡               | Check that sensorgrams have sufficient curvature.                                        |           |            |
| ➡               | Examine the residual plot. Pay attention to systematic and non-random deviations.        |           |            |

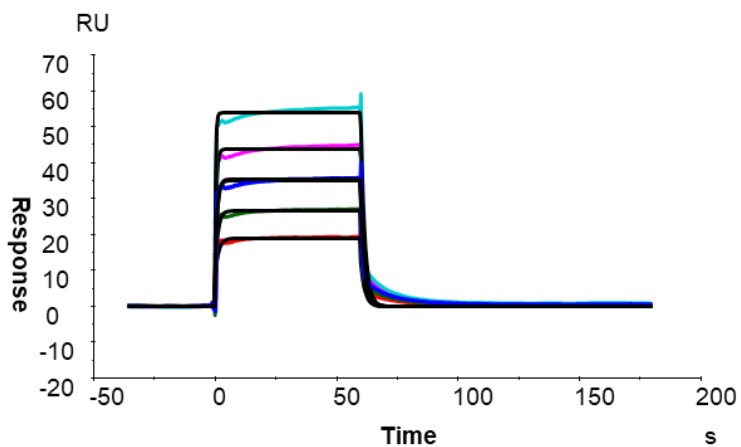

| Curve                     | $k_a$ (1/Ms) | $k_d$ (1/s) | KD (M)   | Rmax (RU) | Conc (M) |
|---------------------------|--------------|-------------|----------|-----------|----------|
|                           | 7.717E+4     | 0.5993      | 7.765E-6 | 63.22     |          |
| <b>Cycle: 16 1.875 μM</b> |              |             |          |           | 1.875E-6 |
| <b>Cycle: 17 3.75 μM</b>  |              |             |          |           | 3.750E-6 |
| <b>Cycle: 18 7.5 μM</b>   |              |             |          |           | 7.500E-6 |
| <b>Cycle: 19 15 μM</b>    |              |             |          |           | 1.500E-5 |
| <b>Cycle: 20 30 μM</b>    |              |             |          |           | 3.000E-5 |
| <b>Cycle: 21 7.5 μM</b>   |              |             |          |           | 7.500E-6 |

|                 |                                                                                          |           |            |
|-----------------|------------------------------------------------------------------------------------------|-----------|------------|
| Quality Control | Report                                                                                   | Residuals | Parameters |
| ⚠               | Kinetic constant $k_d$ is approaching the limits that can be measured by the instrument. |           |            |
| ✅               | Kinetic constants appear to be uniquely determined.                                      |           |            |
| ⚠               | High bulk contributions (RI) found.                                                      |           |            |
| ➡               | Check that sensorgrams have sufficient curvature.                                        |           |            |
| ➡               | Examine the residual plot. Pay attention to systematic and non-random deviations.        |           |            |

**Figure S19.** The SPR sensorgrams, fitting parameters and quality control table of kanamycin (3 replicates)

- Amikacin

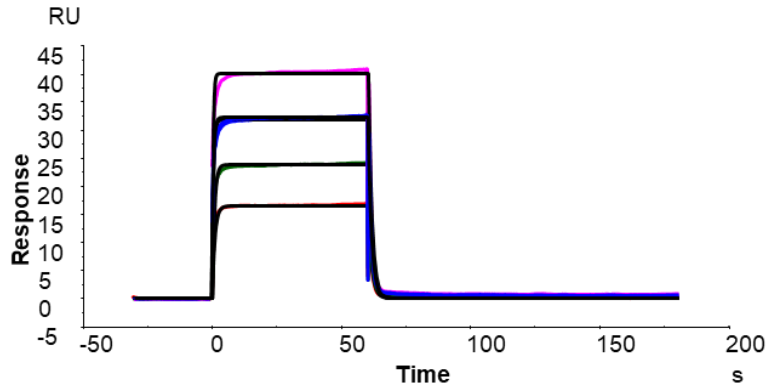

| Curve                 | ka (1/Ms) | kd (1/s) | KD (M)   | Rmax (RU) | Conc (M) |
|-----------------------|-----------|----------|----------|-----------|----------|
|                       | 7.498E+4  | 0.5820   | 7.762E-6 | 39.65     |          |
| Cycle: 5 3.75 $\mu$ M |           |          |          |           | 3.750E-6 |
| Cycle: 6 7.5 $\mu$ M  |           |          |          |           | 7.500E-6 |
| Cycle: 7 15 $\mu$ M   |           |          |          |           | 1.500E-5 |
| Cycle: 8 30 $\mu$ M   |           |          |          |           | 3.000E-5 |
| Cycle: 9 15 $\mu$ M   |           |          |          |           | 1.500E-5 |

| Quality Control | Report                                                                                | Residuals | Parameters |
|-----------------|---------------------------------------------------------------------------------------|-----------|------------|
| ⚠               | Kinetic constant kd is approaching the limits that can be measured by the instrument. |           |            |
| ✅               | Kinetic constants appear to be uniquely determined.                                   |           |            |
| ⚠               | High bulk contributions (RI) found.                                                   |           |            |
| 🔍               | Check that sensorgrams have sufficient curvature.                                     |           |            |
| 🔍               | Examine the residual plot. Pay attention to systematic and non-random deviations.     |           |            |

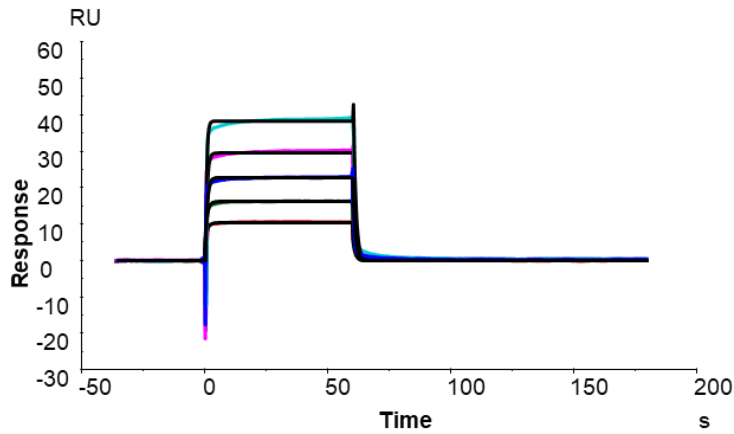

| Curve                   | ka (1/Ms) | kd (1/s) | KD (M)   | Rmax (RU) | Conc (M) |
|-------------------------|-----------|----------|----------|-----------|----------|
|                         | 3.987E+4  | 1.025    | 2.570E-5 | 97.03     |          |
| Cycle: 23 1.875 $\mu$ M |           |          |          |           | 1.875E-6 |
| Cycle: 24 3.75 $\mu$ M  |           |          |          |           | 3.750E-6 |
| Cycle: 25 7.5 $\mu$ M   |           |          |          |           | 7.500E-6 |
| Cycle: 26 15 $\mu$ M    |           |          |          |           | 1.500E-5 |
| Cycle: 27 30 $\mu$ M    |           |          |          |           | 3.000E-5 |
| Cycle: 28 7.5 $\mu$ M   |           |          |          |           | 7.500E-6 |

| Quality Control | Report                                                                                   | Residuals | Parameters |
|-----------------|------------------------------------------------------------------------------------------|-----------|------------|
| ⚠               | Kinetic constant $k_d$ is approaching the limits that can be measured by the instrument. |           |            |
| ✔               | Kinetic constants appear to be uniquely determined.                                      |           |            |
| ⚠               | High bulk contributions (RI) found.                                                      |           |            |
| ➡               | Check that sensorgrams have sufficient curvature.                                        |           |            |
| ➡               | Examine the residual plot. Pay attention to systematic and non-random deviations.        |           |            |

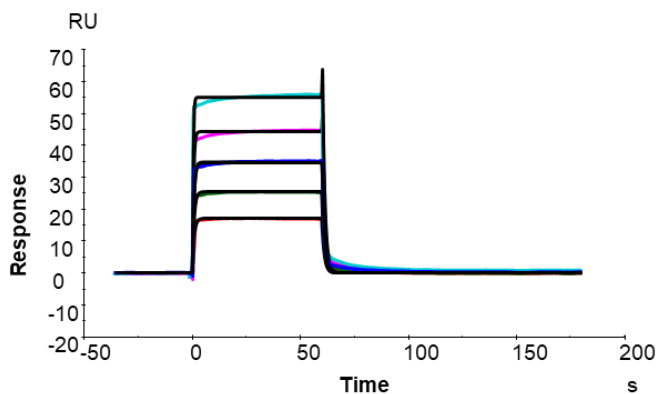

| Curve                                   | $k_a$ (1/Ms) | $k_d$ (1/s) | KD (M)   | Rmax (RU) | Conc (M) |
|-----------------------------------------|--------------|-------------|----------|-----------|----------|
|                                         | 8.442E+4     | 0.9436      | 1.118E-5 | 87.68     |          |
| <b>Cycle: 9 1.875 <math>\mu</math>M</b> |              |             |          |           | 1.875E-6 |
| <b>Cycle: 10 3.75 <math>\mu</math>M</b> |              |             |          |           | 3.750E-6 |
| <b>Cycle: 11 7.5 <math>\mu</math>M</b>  |              |             |          |           | 7.500E-6 |
| <b>Cycle: 12 15 <math>\mu</math>M</b>   |              |             |          |           | 1.500E-5 |
| <b>Cycle: 13 30 <math>\mu</math>M</b>   |              |             |          |           | 3.000E-5 |
| <b>Cycle: 14 7.5 <math>\mu</math>M</b>  |              |             |          |           | 7.500E-6 |

| Quality Control | Report                                                                                   | Residuals | Parameters |
|-----------------|------------------------------------------------------------------------------------------|-----------|------------|
| ⚠               | Kinetic constant $k_d$ is approaching the limits that can be measured by the instrument. |           |            |
| ✔               | Kinetic constants appear to be uniquely determined.                                      |           |            |
| ⚠               | High bulk contributions (RI) found.                                                      |           |            |
| ➡               | Check that sensorgrams have sufficient curvature.                                        |           |            |
| ➡               | Examine the residual plot. Pay attention to systematic and non-random deviations.        |           |            |

Figure S20. The SPR sensorgrams, fitting parameters and quality control table of amikacin (3 replicates)

- DMA-1

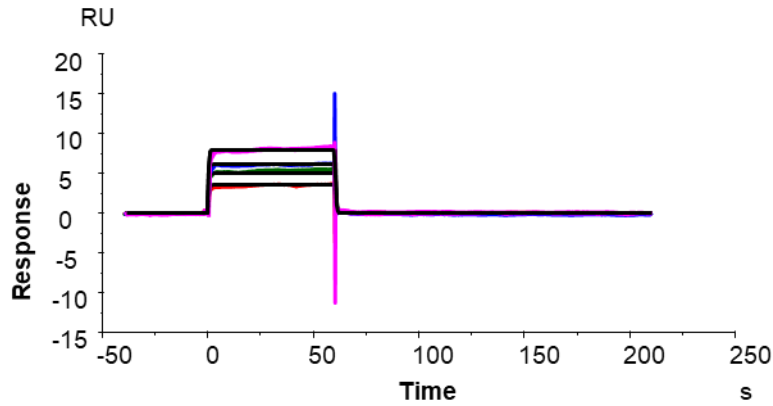

| Curve                  | ka (1/Ms) | kd (1/s) | KD (M)   | Rmax (RU) | Conc (M) |
|------------------------|-----------|----------|----------|-----------|----------|
|                        | 2.108E+4  | 2.427    | 1.151E-4 | 20.46     |          |
| Cycle: 23 25 $\mu$ M   |           |          |          |           | 2.500E-5 |
| Cycle: 24 37.5 $\mu$ M |           |          |          |           | 3.750E-5 |
| Cycle: 25 50 $\mu$ M   |           |          |          |           | 5.000E-5 |
| Cycle: 26 75 $\mu$ M   |           |          |          |           | 7.500E-5 |
| Cycle: 27 75 $\mu$ M   |           |          |          |           | 7.500E-5 |

| Quality Control                     | Report                                                                            | Residuals | Parameters |
|-------------------------------------|-----------------------------------------------------------------------------------|-----------|------------|
| <input checked="" type="checkbox"/> | Kinetic constant kd is outside the limits that can be measured by the instrument. |           |            |
| <input checked="" type="checkbox"/> | Kinetic constants cannot be uniquely determined.                                  |           |            |
| <input type="checkbox"/>            | Bulk contributions (RI) were not evaluated. The RI parameter is set to constant.  |           |            |
| <input type="checkbox"/>            | Check that sensorgrams have sufficient curvature.                                 |           |            |
| <input type="checkbox"/>            | Examine the residual plot. Pay attention to systematic and non-random deviations. |           |            |

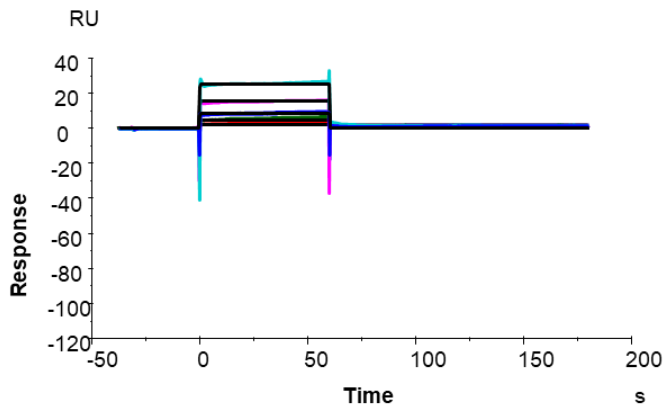

| Curve                  | ka (1/Ms) | kd (1/s) | KD (M)   | Rmax (RU) | Conc (M) |
|------------------------|-----------|----------|----------|-----------|----------|
|                        | 1.549E+4  | 7.764    | 5.012E-4 | 68.27     |          |
| Cycle: 2 18.75 $\mu$ M |           |          |          |           | 1.875E-5 |
| Cycle: 3 37.5 $\mu$ M  |           |          |          |           | 3.750E-5 |
| Cycle: 4 75 $\mu$ M    |           |          |          |           | 7.500E-5 |
| Cycle: 5 150 $\mu$ M   |           |          |          |           | 1.500E-4 |
| Cycle: 6 300 $\mu$ M   |           |          |          |           | 3.000E-4 |
| Cycle: 7 75 $\mu$ M    |           |          |          |           | 7.500E-5 |

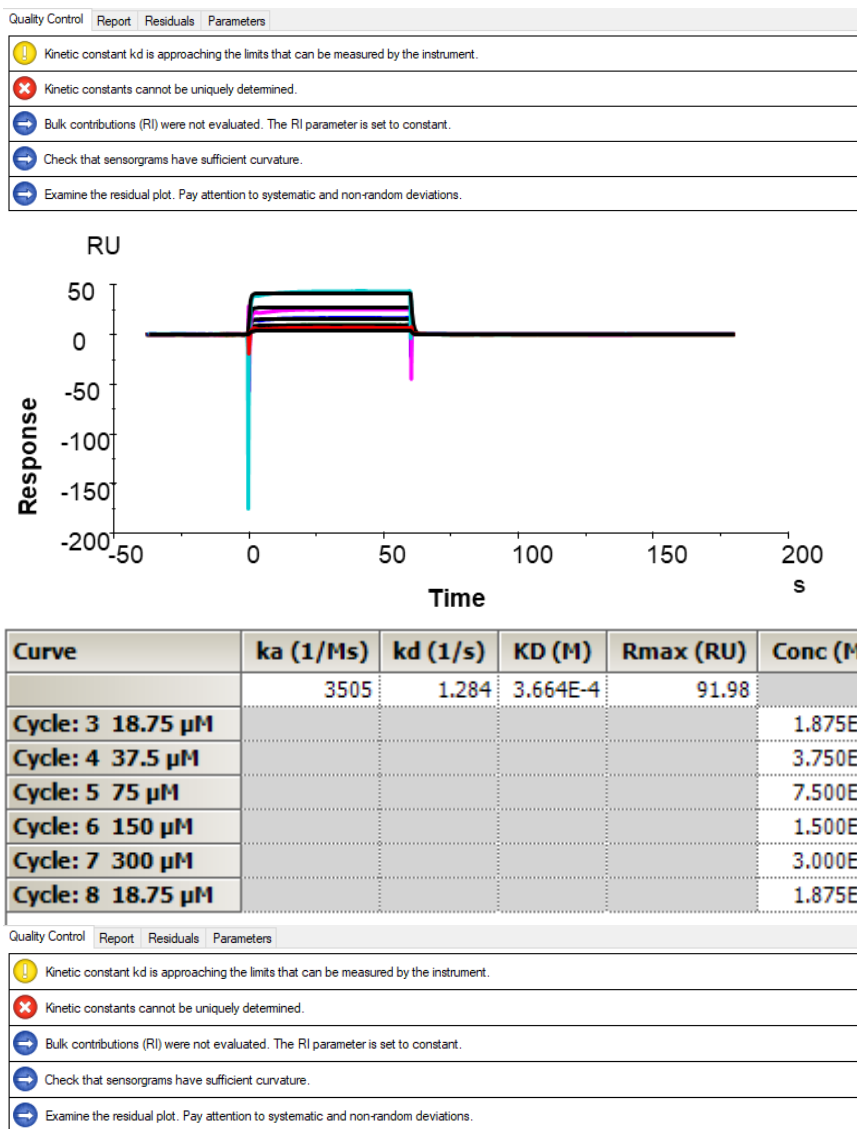

Figure S21. The SPR sensorgrams, fitting parameters and quality control table of DMA-1 (3 replicates)



| Quality Control | Report                                                                                   | Residuals | Parameters |
|-----------------|------------------------------------------------------------------------------------------|-----------|------------|
| ⚠               | Kinetic constant $k_a$ is approaching the limits that can be measured by the instrument. |           |            |
| ✓               | Kinetic constants appear to be uniquely determined.                                      |           |            |
| ⚠               | High bulk contributions (R) found.                                                       |           |            |
| ➡               | Check that sensorgrams have sufficient curvature.                                        |           |            |
| ➡               | Examine the residual plot. Pay attention to systematic and non-random deviations.        |           |            |

**Figure S22.** The SPR sensorgrams, fitting parameters and quality control table of DMA-148 (2 replicates)

- DMA-156

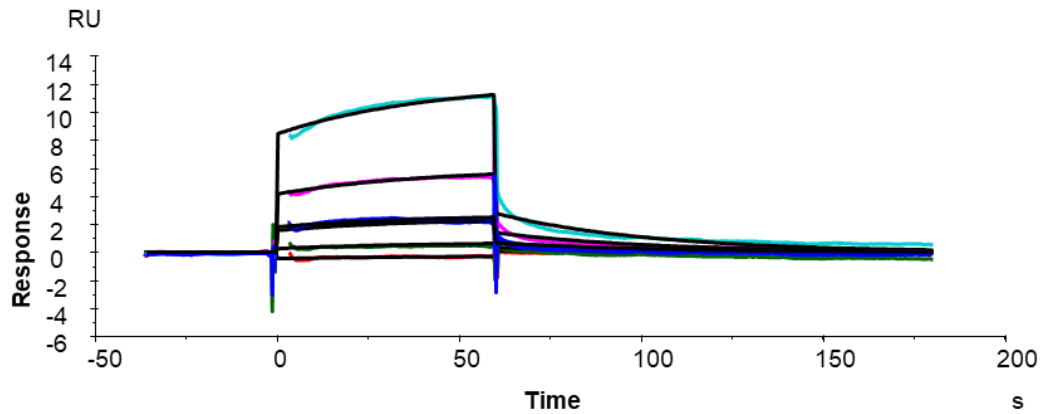

| Curve             | ka (1/Ms) | kd (1/s) | KD (M)   | Rmax (RU) | Conc (M) |
|-------------------|-----------|----------|----------|-----------|----------|
|                   | 25.82     | 0.02319  | 8.981E-4 | 114.3     |          |
| Cycle: 9 1.875 μM |           |          |          |           | 1.875E-6 |
| Cycle: 10 3.75 μM |           |          |          |           | 3.750E-6 |
| Cycle: 11 7.5 μM  |           |          |          |           | 7.500E-6 |
| Cycle: 12 15 μM   |           |          |          |           | 1.500E-5 |
| Cycle: 13 30 μM   |           |          |          |           | 3.000E-5 |
| Cycle: 14 7.5 μM  |           |          |          |           | 7.500E-6 |

| Quality Control | Report                                                                                                             | Residuals | Parameters |
|-----------------|--------------------------------------------------------------------------------------------------------------------|-----------|------------|
| ✖               | Kinetic constant ka is outside the limits that can be measured by the instrument.                                  |           |            |
| ⚠               | Kinetic constants were difficult to determine.<br>Try to immobilize less ligand or increase analyte concentration. |           |            |
| ⚠               | High bulk contributions (RI) found.                                                                                |           |            |
| ➡               | Check that sensors have sufficient curvature.                                                                      |           |            |
| ➡               | Examine the residual plot. Pay attention to systematic and non-random deviations.                                  |           |            |

**Figure S23.** The SPR sensorgrams, fitting parameters and quality control table of DMA-156 (1 replicate)



- DMA-164

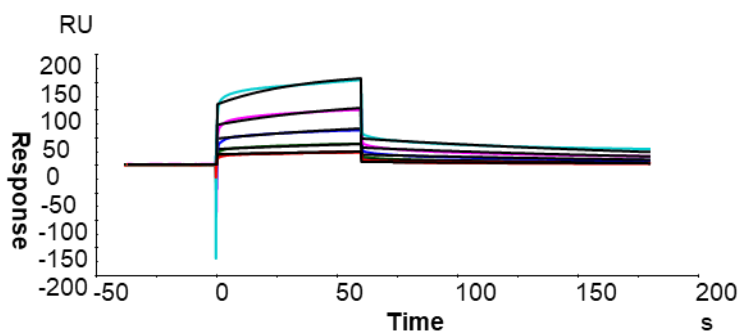

| Curve                  | ka (1/Ms) | kd (1/s) | KD (M)   | Rmax (RU) | Conc (M) |
|------------------------|-----------|----------|----------|-----------|----------|
|                        | 75.61     | 0.006060 | 8.015E-5 | 73.42     |          |
| Cycle: 4 18.75 $\mu$ M |           |          |          |           | 1.875E-5 |
| Cycle: 5 37.5 $\mu$ M  |           |          |          |           | 3.750E-5 |
| Cycle: 6 75 $\mu$ M    |           |          |          |           | 7.500E-5 |
| Cycle: 7 150 $\mu$ M   |           |          |          |           | 1.500E-4 |
| Cycle: 8 300 $\mu$ M   |           |          |          |           | 3.000E-4 |
| Cycle: 9 18.75 $\mu$ M |           |          |          |           | 1.875E-5 |

| Quality Control                                                                                                       | Report | Residuals | Parameters |
|-----------------------------------------------------------------------------------------------------------------------|--------|-----------|------------|
| <span style="color: red;">✘</span> Kinetic constant ka is outside the limits that can be measured by the instrument.  |        |           |            |
| <span style="color: green;">✔</span> Kinetic constants appear to be uniquely determined.                              |        |           |            |
| <span style="color: yellow;">!</span> High bulk contributions (R) found.                                              |        |           |            |
| <span style="color: blue;">➡</span> Check that sensorgrams have sufficient curvature.                                 |        |           |            |
| <span style="color: blue;">➡</span> Examine the residual plot. Pay attention to systematic and non-random deviations. |        |           |            |

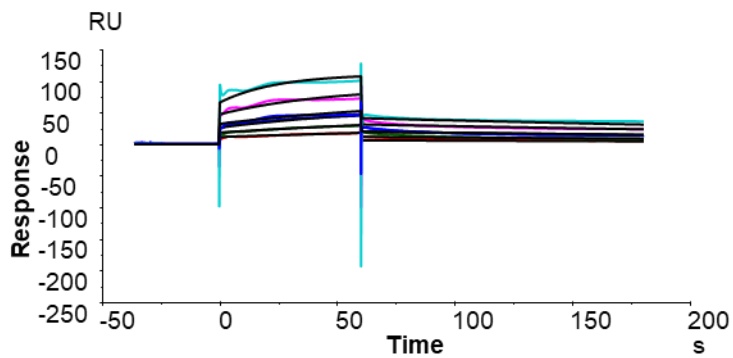

| Curve                   | ka (1/Ms) | kd (1/s) | KD (M)   | Rmax (RU) | Conc (M) |
|-------------------------|-----------|----------|----------|-----------|----------|
|                         | 131.1     | 0.002328 | 1.776E-5 | 47.74     |          |
| Cycle: 30 18.75 $\mu$ M |           |          |          |           | 1.875E-5 |
| Cycle: 31 37.5 $\mu$ M  |           |          |          |           | 3.750E-5 |
| Cycle: 32 75 $\mu$ M    |           |          |          |           | 7.500E-5 |
| Cycle: 33 150 $\mu$ M   |           |          |          |           | 1.500E-4 |
| Cycle: 34 300 $\mu$ M   |           |          |          |           | 3.000E-4 |
| Cycle: 35 75 $\mu$ M    |           |          |          |           | 7.500E-5 |

|                                       |                                                                                      |           |            |
|---------------------------------------|--------------------------------------------------------------------------------------|-----------|------------|
| Quality Control                       | Report                                                                               | Residuals | Parameters |
| <span style="color: red;">✘</span>    | Kinetic constant $k_a$ is outside the limits that can be measured by the instrument. |           |            |
| <span style="color: green;">✔</span>  | Kinetic constants appear to be uniquely determined.                                  |           |            |
| <span style="color: yellow;">!</span> | High bulk contributions (R) found.                                                   |           |            |
| <span style="color: blue;">↺</span>   | Check that sensorgrams have sufficient curvature.                                    |           |            |
| <span style="color: blue;">↻</span>   | Examine the residual plot. Pay attention to systematic and non-random deviations.    |           |            |

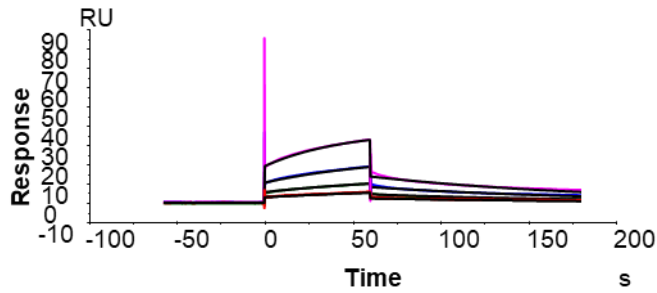

| Curve                                   | $k_a$ (1/Ms) | $k_d$ (1/s) | KD (M)   | Rmax (RU) | Conc (M) |
|-----------------------------------------|--------------|-------------|----------|-----------|----------|
|                                         | 503.2        | 0.007451    | 1.481E-5 | 27.62     |          |
| <b>Cycle: 22 3.75 <math>\mu</math>M</b> |              |             |          |           | 3.750E-6 |
| <b>Cycle: 23 7.5 <math>\mu</math>M</b>  |              |             |          |           | 7.500E-6 |
| <b>Cycle: 24 15 <math>\mu</math>M</b>   |              |             |          |           | 1.500E-5 |
| <b>Cycle: 25 30 <math>\mu</math>M</b>   |              |             |          |           | 3.000E-5 |
| <b>Cycle: 26 3.75 <math>\mu</math>M</b> |              |             |          |           | 3.750E-6 |

|                                       |                                                                                          |           |            |
|---------------------------------------|------------------------------------------------------------------------------------------|-----------|------------|
| Quality Control                       | Report                                                                                   | Residuals | Parameters |
| <span style="color: yellow;">!</span> | Kinetic constant $k_a$ is approaching the limits that can be measured by the instrument. |           |            |
| <span style="color: green;">✔</span>  | Kinetic constants appear to be uniquely determined.                                      |           |            |
| <span style="color: yellow;">!</span> | High bulk contributions (R) found.                                                       |           |            |
| <span style="color: blue;">↺</span>   | Check that sensorgrams have sufficient curvature.                                        |           |            |
| <span style="color: blue;">↻</span>   | Examine the residual plot. Pay attention to systematic and non-random deviations.        |           |            |

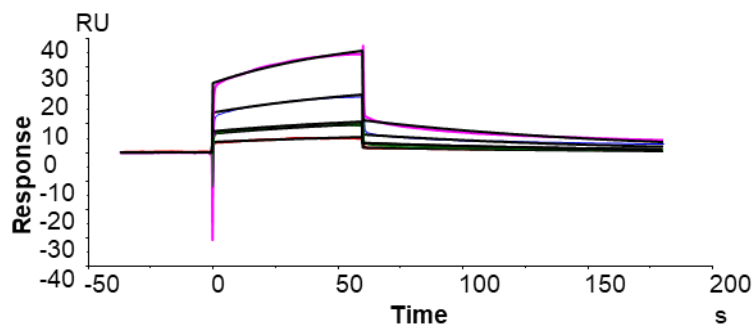

| Curve                                   | $k_a$ (1/Ms) | $k_d$ (1/s) | KD (M)   | Rmax (RU) | Conc (M) |
|-----------------------------------------|--------------|-------------|----------|-----------|----------|
|                                         | 266.6        | 0.009384    | 3.520E-5 | 37.69     |          |
| <b>Cycle: 36 3.75 <math>\mu</math>M</b> |              |             |          |           | 3.750E-6 |
| <b>Cycle: 37 7.5 <math>\mu</math>M</b>  |              |             |          |           | 7.500E-6 |
| <b>Cycle: 38 15 <math>\mu</math>M</b>   |              |             |          |           | 1.500E-5 |
| <b>Cycle: 39 30 <math>\mu</math>M</b>   |              |             |          |           | 3.000E-5 |
| <b>Cycle: 40 7.5 <math>\mu</math>M</b>  |              |             |          |           | 7.500E-6 |

| Quality Control                                                                   | Report                                                                                                               | Residuals | Parameters |
|-----------------------------------------------------------------------------------|----------------------------------------------------------------------------------------------------------------------|-----------|------------|
|  | Kinetic constant $k_a$ is outside the limits that can be measured by the instrument.                                 |           |            |
|  | Kinetic constants cannot be uniquely determined.<br>Try to immobilize less ligand or increase analyte concentration. |           |            |
|  | High bulk contributions (RI) found.                                                                                  |           |            |
|  | Check that sensorgrams have sufficient curvature.                                                                    |           |            |
|  | Examine the residual plot. Pay attention to systematic and non-random deviations.                                    |           |            |

**Figure S24.** The SPR sensorgrams, fitting parameters and quality control table of DMA-164 (4 replicates)

- DMA-180

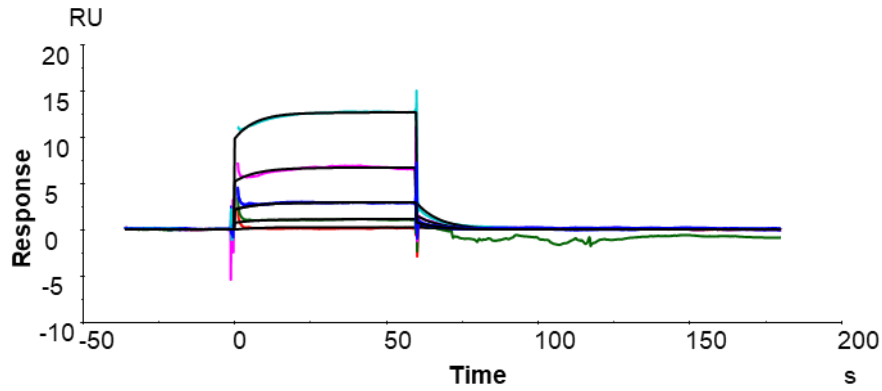

| Curve                   | ka (1/Ms) | kd (1/s) | KD (M)   | Rmax (RU) | Conc (M) |
|-------------------------|-----------|----------|----------|-----------|----------|
|                         | 549.9     | 0.1301   | 2.366E-4 | 26.03     |          |
| Cycle: 16 1.875 $\mu$ M |           |          |          |           | 1.875E-6 |
| Cycle: 17 3.75 $\mu$ M  |           |          |          |           | 3.750E-6 |
| Cycle: 18 7.5 $\mu$ M   |           |          |          |           | 7.500E-6 |
| Cycle: 19 15 $\mu$ M    |           |          |          |           | 1.500E-5 |
| Cycle: 20 30 $\mu$ M    |           |          |          |           | 3.000E-5 |
| Cycle: 21 7.5 $\mu$ M   |           |          |          |           | 7.500E-6 |

| Quality Control | Report                                                                                                               | Residuals | Parameters |
|-----------------|----------------------------------------------------------------------------------------------------------------------|-----------|------------|
| ⚠               | Kinetic constant ka is approaching the limits that can be measured by the instrument.                                |           |            |
| ✖               | Kinetic constants cannot be uniquely determined.<br>Try to immobilize less ligand or increase analyte concentration. |           |            |
| ⚠               | High bulk contributions (RI) found.                                                                                  |           |            |
| ➡               | Check that sensorgrams have sufficient curvature.                                                                    |           |            |
| ➡               | Examine the residual plot. Pay attention to systematic and non-random deviations.                                    |           |            |

Figure S25. The SPR sensorgrams, fitting parameters and quality control table of DMA-180 (1 replicate)



| Quality Control                       | Report                                                                               | Residuals | Parameters |
|---------------------------------------|--------------------------------------------------------------------------------------|-----------|------------|
| <span style="color: red;">✘</span>    | Kinetic constant $k_a$ is outside the limits that can be measured by the instrument. |           |            |
| <span style="color: green;">✔</span>  | Kinetic constants appear to be uniquely determined.                                  |           |            |
| <span style="color: yellow;">!</span> | High bulk contributions (RI) found.                                                  |           |            |
| <span style="color: blue;">➔</span>   | Check that sensorgrams have sufficient curvature.                                    |           |            |
| <span style="color: blue;">➔</span>   | Examine the residual plot. Pay attention to systematic and non-random deviations.    |           |            |

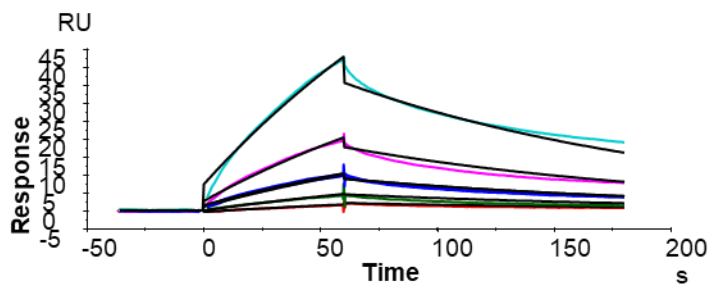

| Quality Control                          | Report                         | Residuals                     | Parameters    |                  |                 |
|------------------------------------------|--------------------------------|-------------------------------|---------------|------------------|-----------------|
| <b>Curve</b>                             | <b><math>k_a</math> (1/Ms)</b> | <b><math>k_d</math> (1/s)</b> | <b>KD (M)</b> | <b>Rmax (RU)</b> | <b>Conc (M)</b> |
|                                          | 2.804                          | 0.006597                      | 0.002352      | 8516             |                 |
| <b>Cycle: 23 1.875 <math>\mu</math>M</b> |                                |                               |               |                  | 1.875E-6        |
| <b>Cycle: 24 3.75 <math>\mu</math>M</b>  |                                |                               |               |                  | 3.750E-6        |
| <b>Cycle: 25 7.5 <math>\mu</math>M</b>   |                                |                               |               |                  | 7.500E-6        |
| <b>Cycle: 26 15 <math>\mu</math>M</b>    |                                |                               |               |                  | 1.500E-5        |
| <b>Cycle: 27 30 <math>\mu</math>M</b>    |                                |                               |               |                  | 3.000E-5        |
| <b>Cycle: 28 7.5 <math>\mu</math>M</b>   |                                |                               |               |                  | 7.500E-6        |

| Quality Control                       | Report                                                                               | Residuals | Parameters |
|---------------------------------------|--------------------------------------------------------------------------------------|-----------|------------|
| <span style="color: red;">✘</span>    | Kinetic constant $k_a$ is outside the limits that can be measured by the instrument. |           |            |
| <span style="color: green;">✔</span>  | Kinetic constants appear to be uniquely determined.                                  |           |            |
| <span style="color: yellow;">!</span> | High bulk contributions (RI) found.                                                  |           |            |
| <span style="color: blue;">➔</span>   | Check that sensorgrams have sufficient curvature.                                    |           |            |
| <span style="color: blue;">➔</span>   | Examine the residual plot. Pay attention to systematic and non-random deviations.    |           |            |

**Figure S26.** The SPR sensorgrams, fitting parameters and quality control table of DMA-186 (3 replicates)

- DMA-187

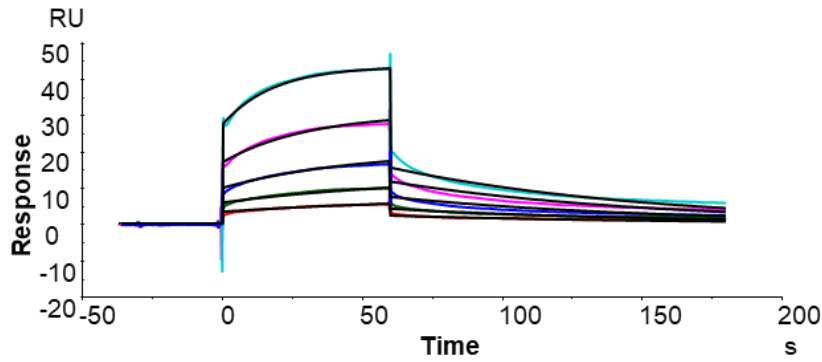

| Curve              | ka (1/Ms) | kd (1/s) | KD (M)   | Rmax (RU) | Conc (M) |
|--------------------|-----------|----------|----------|-----------|----------|
|                    | 887.8     | 0.01074  | 1.210E-5 | 20.02     |          |
| Cycle: 23 3.125 µM |           |          |          |           | 3.125E-6 |
| Cycle: 24 6.25 µM  |           |          |          |           | 6.250E-6 |
| Cycle: 26 25 µM    |           |          |          |           | 2.500E-5 |
| Cycle: 27 50 µM    |           |          |          |           | 5.000E-5 |
| Cycle: 28 12.5 µM  |           |          |          |           | 1.250E-5 |

| Quality Control | Report                                                                                | Residuals | Parameters |
|-----------------|---------------------------------------------------------------------------------------|-----------|------------|
| ⚠               | Kinetic constant ka is approaching the limits that can be measured by the instrument. |           |            |
| ✅               | Kinetic constants appear to be uniquely determined.                                   |           |            |
| ⚠               | High bulk contributions (R) found.                                                    |           |            |
| 🔍               | Check that sensorgrams have sufficient curvature.                                     |           |            |
| 🔍               | Examine the residual plot. Pay attention to systematic and non-random deviations.     |           |            |

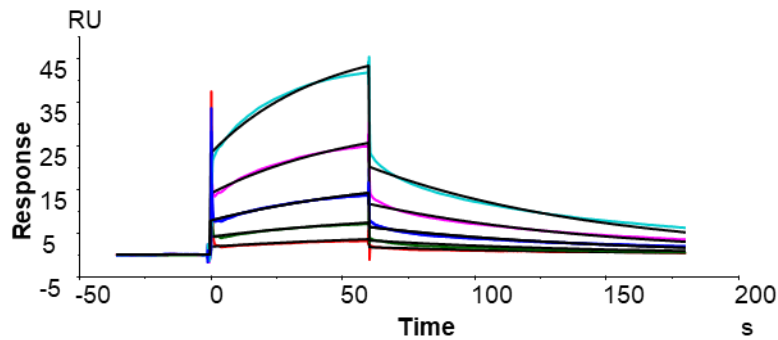

| Curve              | ka (1/Ms) | kd (1/s) | KD (M)   | Rmax (RU) | Conc (M) |
|--------------------|-----------|----------|----------|-----------|----------|
|                    | 413.1     | 0.01144  | 2.769E-5 | 50.99     |          |
| Cycle: 30 1.875 µM |           |          |          |           | 1.875E-6 |
| Cycle: 31 3.75 µM  |           |          |          |           | 3.750E-6 |
| Cycle: 32 7.5 µM   |           |          |          |           | 7.500E-6 |
| Cycle: 33 15 µM    |           |          |          |           | 1.500E-5 |
| Cycle: 34 30 µM    |           |          |          |           | 3.000E-5 |
| Cycle: 35 7.5 µM   |           |          |          |           | 7.500E-6 |

| Quality Control                                                                   | Report                                                                                   | Residuals | Parameters |
|-----------------------------------------------------------------------------------|------------------------------------------------------------------------------------------|-----------|------------|
|  | Kinetic constant $k_a$ is approaching the limits that can be measured by the instrument. |           |            |
|  | Kinetic constants appear to be uniquely determined.                                      |           |            |
|  | High bulk contributions (R) found.                                                       |           |            |
|  | Check that sensorgrams have sufficient curvature.                                        |           |            |
|  | Examine the residual plot. Pay attention to systematic and non-random deviations.        |           |            |

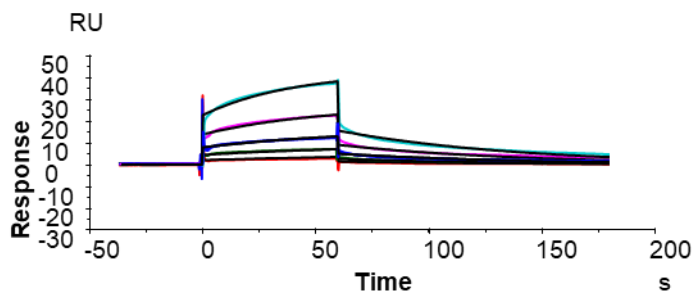

| Curve     | $k_a$ (1/Ms)  | SE( $k_a$ ) | $k_d$ (1/s) | SE( $k_d$ ) | Rmax (RU) | SE(Rmax) | Conc (M)  |
|-----------|---------------|-------------|-------------|-------------|-----------|----------|-----------|
|           | 420.1         | 13          | 0.01251     | 1.8E-4      | 40.0      | 0.87     |           |
| Cycle: 37 | 1.875 $\mu$ M |             |             |             |           |          | 1.875E-06 |
| Cycle: 38 | 3.75 $\mu$ M  |             |             |             |           |          | 3.75E-06  |
| Cycle: 39 | 7.5 $\mu$ M   |             |             |             |           |          | 7.5E-06   |
| Cycle: 40 | 15 $\mu$ M    |             |             |             |           |          | 1.5E-05   |
| Cycle: 41 | 30 $\mu$ M    |             |             |             |           |          | 3E-05     |
| Cycle: 42 | 7.5 $\mu$ M   |             |             |             |           |          | 7.5E-06   |

| Quality Control                                                                     | Report                                                                                                             | Residuals | Parameters |
|-------------------------------------------------------------------------------------|--------------------------------------------------------------------------------------------------------------------|-----------|------------|
|  | Kinetic constant $k_a$ is approaching the limits that can be measured by the instrument.                           |           |            |
|  | Kinetic constants were difficult to determine.<br>Try to immobilize less ligand or increase analyte concentration. |           |            |
|  | High bulk contributions (R) found.                                                                                 |           |            |
|  | Check that sensorgrams have sufficient curvature.                                                                  |           |            |
|  | Examine the residual plot. Pay attention to systematic and non-random deviations.                                  |           |            |

**Figure S27.** The SPR sensorgrams, fitting parameters and quality control table of DMA-187 (3 replicates)



DMA-190

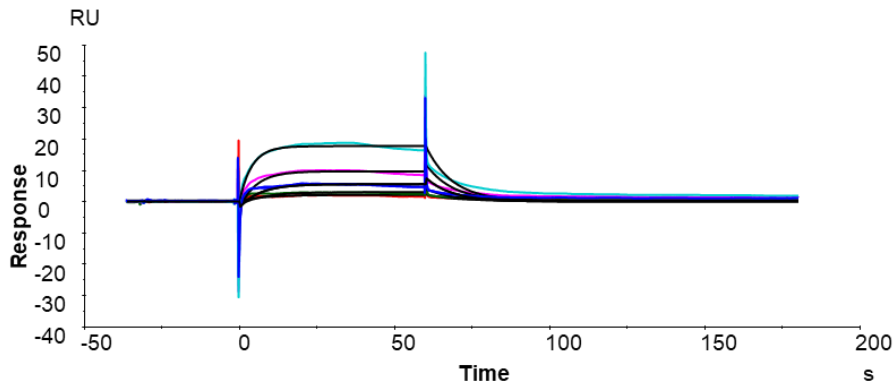

| Curve              | ka (1/Ms) | kd (1/s) | KD (M)   | Rmax (RU) | Conc (M) |
|--------------------|-----------|----------|----------|-----------|----------|
|                    | 2691      | 0.1180   | 4.386E-5 | 33.27     |          |
| Cycle: 30 3.125 µM |           |          |          |           | 3.125E-6 |
| Cycle: 31 6.25 µM  |           |          |          |           | 6.250E-6 |
| Cycle: 32 12.5 µM  |           |          |          |           | 1.250E-5 |
| Cycle: 33 25 µM    |           |          |          |           | 2.500E-5 |
| Cycle: 34 50 µM    |           |          |          |           | 5.000E-5 |
| Cycle: 35 12.5 µM  |           |          |          |           | 1.250E-5 |

| Quality Control | Report                                                                                | Residuals | Parameters |
|-----------------|---------------------------------------------------------------------------------------|-----------|------------|
| ⚠               | Kinetic constant ka is approaching the limits that can be measured by the instrument. |           |            |
| ✔               | Kinetic constants appear to be uniquely determined.                                   |           |            |
| ⚠               | High bulk contributions (RI) found.                                                   |           |            |
| ↔               | Check that sensorgrams have sufficient curvature.                                     |           |            |
| ↔               | Examine the residual plot. Pay attention to systematic and non-random deviations.     |           |            |

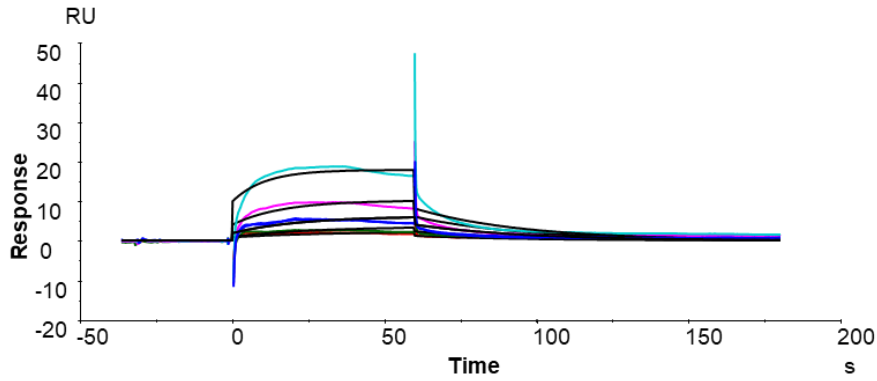

| Curve                   | ka (1/Ms) | kd (1/s) | KD (M)   | Rmax (RU) | Conc (M) |
|-------------------------|-----------|----------|----------|-----------|----------|
|                         | 1331      | 0.02812  | 2.113E-5 | 11.67     |          |
| Cycle: 30 3.125 $\mu$ M |           |          |          |           | 3.125E-6 |
| Cycle: 31 6.25 $\mu$ M  |           |          |          |           | 6.250E-6 |
| Cycle: 32 12.5 $\mu$ M  |           |          |          |           | 1.250E-5 |
| Cycle: 33 25 $\mu$ M    |           |          |          |           | 2.500E-5 |
| Cycle: 34 50 $\mu$ M    |           |          |          |           | 5.000E-5 |
| Cycle: 35 12.5 $\mu$ M  |           |          |          |           | 1.250E-5 |

| Quality Control | Report                                                                                | Residuals | Parameters |
|-----------------|---------------------------------------------------------------------------------------|-----------|------------|
| ⚠               | Kinetic constant ka is approaching the limits that can be measured by the instrument. |           |            |
| ✅               | Kinetic constants appear to be uniquely determined.                                   |           |            |
| ⚠               | High bulk contributions (RI) found.                                                   |           |            |
| ⚠               | Check that sensorgrams have sufficient curvature.                                     |           |            |
| ⚠               | Examine the residual plot. Pay attention to systematic and non-random deviations.     |           |            |

**Figure S28.** The SPR sensorgrams, fitting parameters and quality control table of DMA-190 (2 replicates)

- DMA-191

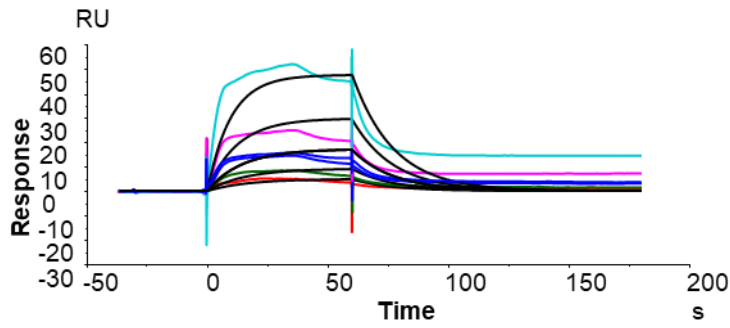

| Curve                    | ka (1/Ms) | kd (1/s) | KD (M)   | Rmax (RU) | Conc (M) |
|--------------------------|-----------|----------|----------|-----------|----------|
|                          | 1750      | 0.05895  | 3.369E-5 | 111.2     |          |
| Cycle: 37 1.5625 $\mu$ M |           |          |          |           | 1.563E-6 |
| Cycle: 38 3.125 $\mu$ M  |           |          |          |           | 3.125E-6 |
| Cycle: 39 6.25 $\mu$ M   |           |          |          |           | 6.250E-6 |
| Cycle: 40 12.5 $\mu$ M   |           |          |          |           | 1.250E-5 |
| Cycle: 41 25 $\mu$ M     |           |          |          |           | 2.500E-5 |
| Cycle: 42 6.25 $\mu$ M   |           |          |          |           | 6.250E-6 |

| Quality Control | Report                                                                                | Residuals | Parameters |
|-----------------|---------------------------------------------------------------------------------------|-----------|------------|
| ⚠               | Kinetic constant ka is approaching the limits that can be measured by the instrument. |           |            |
| ⚠               | Kinetic constants were difficult to determine.                                        |           |            |
| ⚙               | Bulk contributions (RI) were not evaluated. The RI parameter is set to constant.      |           |            |
| ⚙               | Check that sensorgrams have sufficient curvature.                                     |           |            |
| ⚙               | Examine the residual plot. Pay attention to systematic and non-random deviations.     |           |            |

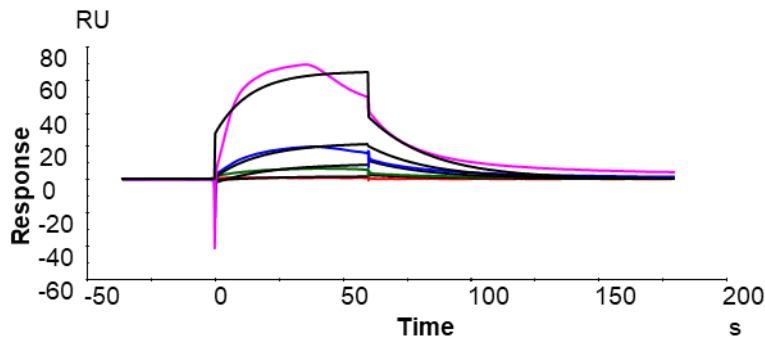

| Curve                | ka (1/Ms) | kd (1/s) | KD (M)   | Rmax (RU) | Conc (M) |
|----------------------|-----------|----------|----------|-----------|----------|
|                      | 1295      | 0.04046  | 3.124E-5 | 85.50     |          |
| Cycle: 9 1 $\mu$ M   |           |          |          |           | 1.000E-6 |
| Cycle: 10 5 $\mu$ M  |           |          |          |           | 5.000E-6 |
| Cycle: 11 10 $\mu$ M |           |          |          |           | 1.000E-5 |
| Cycle: 12 25 $\mu$ M |           |          |          |           | 2.500E-5 |

| Quality Control | Report                                                                                   | Residuals | Parameters |
|-----------------|------------------------------------------------------------------------------------------|-----------|------------|
| !               | Kinetic constant $k_a$ is approaching the limits that can be measured by the instrument. |           |            |
| ✓               | Kinetic constants appear to be uniquely determined.                                      |           |            |
| !               | High bulk contributions (RI) found.                                                      |           |            |
| →               | Check that sensorgrams have sufficient curvature.                                        |           |            |
| →               | Examine the residual plot. Pay attention to systematic and non-random deviations.        |           |            |

**Figure S29.** The SPR sensorgrams, fitting parameters and quality control table of DMA-191 (2 replicates)

- DMA-193

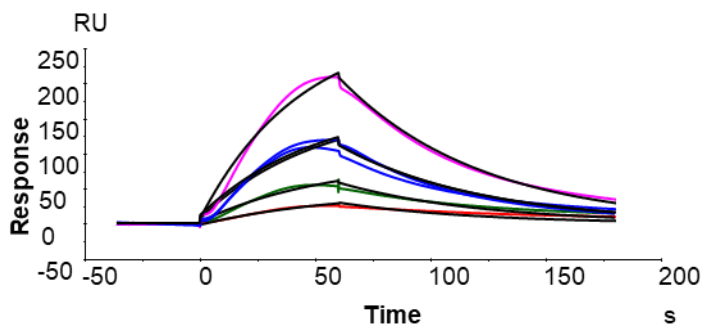

| Curve                    | ka (1/Ms) | kd (1/s) | KD (M)   | Rmax (RU) | Conc (M) |
|--------------------------|-----------|----------|----------|-----------|----------|
|                          | 537.6     | 0.01667  | 3.102E-5 | 963.2     |          |
| Cycle: 30 1.5625 $\mu$ M |           |          |          |           | 1.563E-6 |
| Cycle: 31 3.125 $\mu$ M  |           |          |          |           | 3.125E-6 |
| Cycle: 32 6.25 $\mu$ M   |           |          |          |           | 6.250E-6 |
| Cycle: 33 12.5 $\mu$ M   |           |          |          |           | 1.250E-5 |
| Cycle: 35 6.25 $\mu$ M   |           |          |          |           | 6.250E-6 |

| Quality Control | Report                                                                                                             | Residuals | Parameters |
|-----------------|--------------------------------------------------------------------------------------------------------------------|-----------|------------|
| ⚠               | Kinetic constant ka is approaching the limits that can be measured by the instrument.                              |           |            |
| ⚠               | Kinetic constants were difficult to determine.<br>Try to immobilize less ligand or increase analyte concentration. |           |            |
| ✅               | No significant bulk contributions (R) found.                                                                       |           |            |
| 🔍               | Check that sensorgrams have sufficient curvature.                                                                  |           |            |
| 🔍               | Examine the residual plot. Pay attention to systematic and non-random deviations.                                  |           |            |

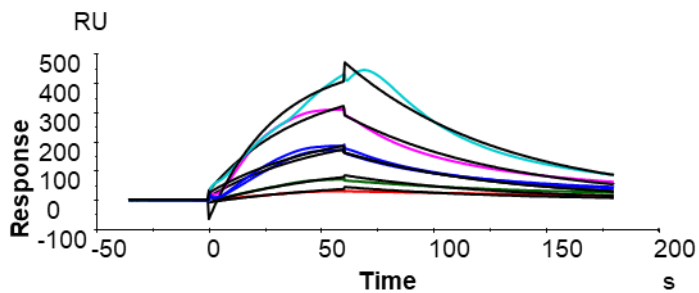

| Curve                   | ka (1/Ms) | kd (1/s) | KD (M)   | Rmax (RU) | Conc (M) |
|-------------------------|-----------|----------|----------|-----------|----------|
|                         | 638.9     | 0.01423  | 2.227E-5 | 952.4     |          |
| Cycle: 16 1.875 $\mu$ M |           |          |          |           | 1.875E-6 |
| Cycle: 17 3.75 $\mu$ M  |           |          |          |           | 3.750E-6 |
| Cycle: 18 7.5 $\mu$ M   |           |          |          |           | 7.500E-6 |
| Cycle: 19 15 $\mu$ M    |           |          |          |           | 1.500E-5 |
| Cycle: 20 30 $\mu$ M    |           |          |          |           | 3.000E-5 |
| Cycle: 21 7.5 $\mu$ M   |           |          |          |           | 7.500E-6 |

| Quality Control | Report                                                                                   | Residuals | Parameters |
|-----------------|------------------------------------------------------------------------------------------|-----------|------------|
| ⚠               | Kinetic constant $k_a$ is approaching the limits that can be measured by the instrument. |           |            |
| ✓               | Kinetic constants appear to be uniquely determined.                                      |           |            |
| ⚠               | High bulk contributions (RI) found.                                                      |           |            |
| ➡               | Check that sensorgrams have sufficient curvature.                                        |           |            |
| ➡               | Examine the residual plot. Pay attention to systematic and non-random deviations.        |           |            |

**Figure S30.** The SPR sensorgrams, fitting parameters and quality control table of DMA-193 (2 replicates)

- DMA-194

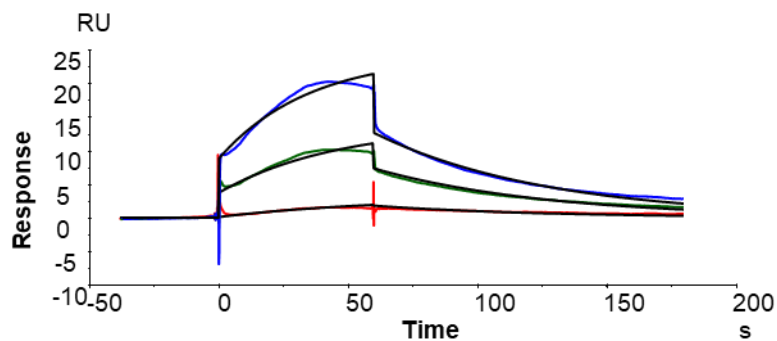

| Curve               | ka (1/Ms) | kd (1/s) | KD (M)   | Rmax (RU) | Conc (M) |
|---------------------|-----------|----------|----------|-----------|----------|
|                     | 1373      | 0.01491  | 1.086E-5 | 32.02     |          |
| Cycle: 2 1 $\mu$ M  |           |          |          |           | 1.000E-6 |
| Cycle: 3 5 $\mu$ M  |           |          |          |           | 5.000E-6 |
| Cycle: 4 10 $\mu$ M |           |          |          |           | 1.000E-5 |

| Quality Control | Report                                                                                | Residuals | Parameters |
|-----------------|---------------------------------------------------------------------------------------|-----------|------------|
| ⚠               | Kinetic constant ka is approaching the limits that can be measured by the instrument. |           |            |
| ✅               | Kinetic constants appear to be uniquely determined.                                   |           |            |
| ⚠               | High bulk contributions (Ri) found.                                                   |           |            |
| ⬇               | Check that sensorgrams have sufficient curvature.                                     |           |            |
| ⬇               | Examine the residual plot. Pay attention to systematic and non-random deviations.     |           |            |

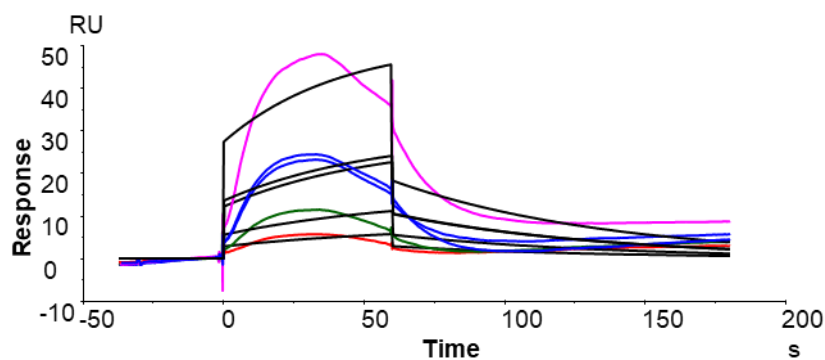

| Curve                    | ka (1/Ms) | kd (1/s) | KD (M)   | Rmax (RU) | Conc (M) |
|--------------------------|-----------|----------|----------|-----------|----------|
|                          | 916.8     | 0.01303  | 1.421E-5 | 50.88     |          |
| Cycle: 37 1.5625 $\mu$ M |           |          |          |           | 1.563E-6 |
| Cycle: 38 3.125 $\mu$ M  |           |          |          |           | 3.125E-6 |
| Cycle: 39 6.25 $\mu$ M   |           |          |          |           | 6.250E-6 |
| Cycle: 40 12.5 $\mu$ M   |           |          |          |           | 1.250E-5 |
| Cycle: 42 6.25 $\mu$ M   |           |          |          |           | 6.250E-6 |

| Quality Control | Report                                                                                                               | Residuals | Parameters |
|-----------------|----------------------------------------------------------------------------------------------------------------------|-----------|------------|
| !               | Kinetic constant $k_a$ is approaching the limits that can be measured by the instrument.                             |           |            |
| ✖               | Kinetic constants cannot be uniquely determined.<br>Try to immobilize less ligand or increase analyte concentration. |           |            |
| !               | High bulk contributions (R1) found.                                                                                  |           |            |
| →               | Check that sensorgrams have sufficient curvature.                                                                    |           |            |
| →               | Examine the residual plot. Pay attention to systematic and non-random deviations.                                    |           |            |

**Figure S31.** The SPR sensorgrams, fitting parameters and quality control table of DMA-194 (2 replicates)



- TO-PRO-1

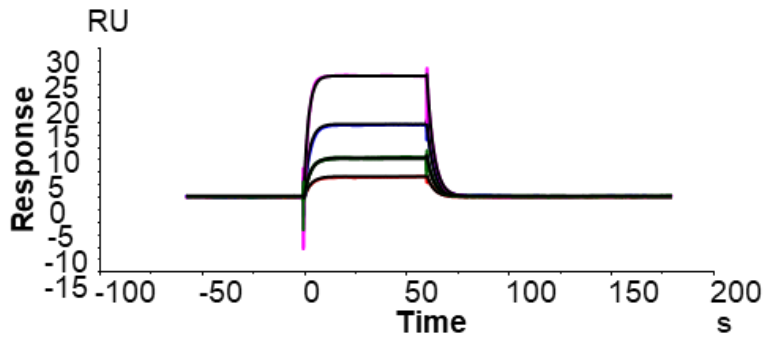

| Curve                    | ka (1/Ms) | kd (1/s) | KD (M)   | Rmax (RU) | Conc (M) |
|--------------------------|-----------|----------|----------|-----------|----------|
|                          | 5.112E+5  | 0.2935   | 5.741E-7 | 76.28     |          |
| Cycle: 11 0.0375 $\mu$ M |           |          |          |           | 3.750E-8 |
| Cycle: 12 0.075 $\mu$ M  |           |          |          |           | 7.500E-8 |
| Cycle: 13 0.15 $\mu$ M   |           |          |          |           | 1.500E-7 |
| Cycle: 14 0.3 $\mu$ M    |           |          |          |           | 3.000E-7 |
| Cycle: 15 0.075 $\mu$ M  |           |          |          |           | 7.500E-8 |

Quality Control Report Residuals Parameters

|                                     |                                                                                   |
|-------------------------------------|-----------------------------------------------------------------------------------|
| <input checked="" type="checkbox"/> | Kinetic constants are within instrument specifications.                           |
| <input checked="" type="checkbox"/> | Kinetic constants appear to be uniquely determined.                               |
| <input checked="" type="checkbox"/> | No significant bulk contributions (RI) found.                                     |
| <input type="checkbox"/>            | Check that sensorgrams have sufficient curvature.                                 |
| <input type="checkbox"/>            | Examine the residual plot. Pay attention to systematic and non-random deviations. |

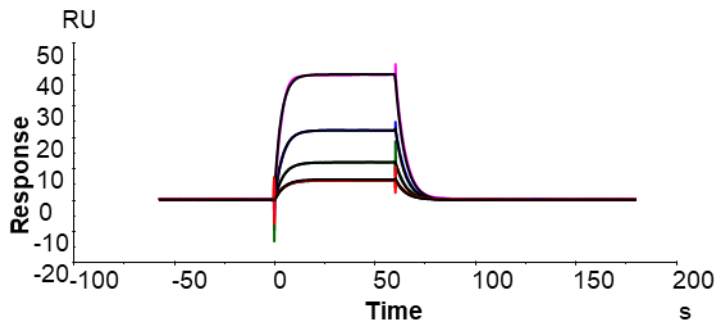

| Curve                    | ka (1/Ms) | kd (1/s) | KD (M)   | Rmax (RU) | Conc (M) |
|--------------------------|-----------|----------|----------|-----------|----------|
|                          | 3.161E+5  | 0.2107   | 6.665E-7 | 126.8     |          |
| Cycle: 34 0.0375 $\mu$ M |           |          |          |           | 3.750E-8 |
| Cycle: 35 0.075 $\mu$ M  |           |          |          |           | 7.500E-8 |
| Cycle: 36 0.15 $\mu$ M   |           |          |          |           | 1.500E-7 |
| Cycle: 37 0.3 $\mu$ M    |           |          |          |           | 3.000E-7 |
| Cycle: 38 0.0375 $\mu$ M |           |          |          |           | 3.750E-8 |

|                                     |                                                                                   |           |            |
|-------------------------------------|-----------------------------------------------------------------------------------|-----------|------------|
| Quality Control                     | Report                                                                            | Residuals | Parameters |
| <input checked="" type="checkbox"/> | Kinetic constants are within instrument specifications.                           |           |            |
| <input checked="" type="checkbox"/> | Kinetic constants appear to be uniquely determined.                               |           |            |
| <input checked="" type="checkbox"/> | No significant bulk contributions (RI) found.                                     |           |            |
| <input type="checkbox"/>            | Check that sensorgrams have sufficient curvature.                                 |           |            |
| <input type="checkbox"/>            | Examine the residual plot. Pay attention to systematic and non-random deviations. |           |            |

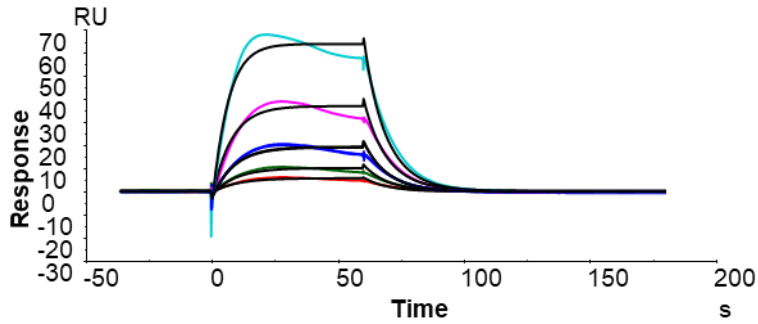

| Curve                     | ka (1/Ms) | kd (1/s) | KD (M)   | Rmax (RU) | Conc (M) |
|---------------------------|-----------|----------|----------|-----------|----------|
|                           | 3.229E+5  | 0.2132   | 6.605E-7 | 215.9     |          |
| Cycle: 29 0.01875 $\mu$ M |           |          |          |           | 1.875E-8 |
| Cycle: 30 0.0375 $\mu$ M  |           |          |          |           | 3.750E-8 |
| Cycle: 31 0.075 $\mu$ M   |           |          |          |           | 7.500E-8 |
| Cycle: 32 0.15 $\mu$ M    |           |          |          |           | 1.500E-7 |
| Cycle: 33 0.3 $\mu$ M     |           |          |          |           | 3.000E-7 |
| Cycle: 34 0.075 $\mu$ M   |           |          |          |           | 7.500E-8 |

|                                     |                                                                                   |           |            |
|-------------------------------------|-----------------------------------------------------------------------------------|-----------|------------|
| Quality Control                     | Report                                                                            | Residuals | Parameters |
| <input checked="" type="checkbox"/> | Kinetic constants are within instrument specifications.                           |           |            |
| <input checked="" type="checkbox"/> | Kinetic constants appear to be uniquely determined.                               |           |            |
| <input type="checkbox"/>            | High bulk contributions (RI) found.                                               |           |            |
| <input type="checkbox"/>            | Check that sensorgrams have sufficient curvature.                                 |           |            |
| <input type="checkbox"/>            | Examine the residual plot. Pay attention to systematic and non-random deviations. |           |            |

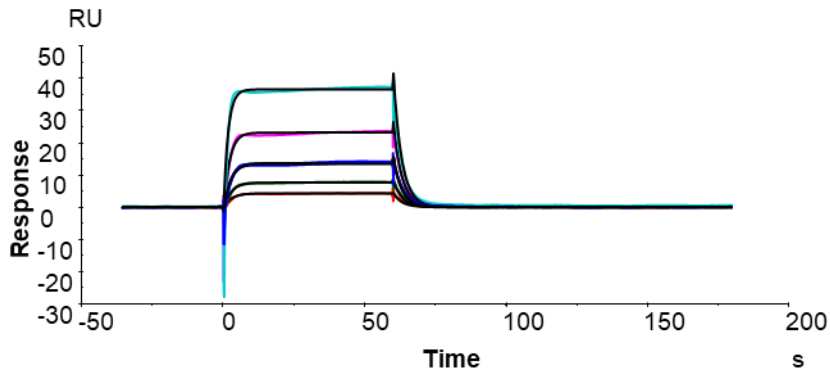

| Curve                    | ka (1/Ms) | kd (1/s) | KD (M)   | Rmax (RU) | Conc (M) |
|--------------------------|-----------|----------|----------|-----------|----------|
|                          | 4.566E+5  | 0.3435   | 7.523E-7 | 99.36     |          |
| Cycle: 30 0.0375 $\mu$ M |           |          |          |           | 3.750E-8 |
| Cycle: 31 0.075 $\mu$ M  |           |          |          |           | 7.500E-8 |
| Cycle: 32 0.15 $\mu$ M   |           |          |          |           | 1.500E-7 |
| Cycle: 33 0.3 $\mu$ M    |           |          |          |           | 3.000E-7 |
| Cycle: 34 0.6 $\mu$ M    |           |          |          |           | 6.000E-7 |
| Cycle: 35 0.15 $\mu$ M   |           |          |          |           | 1.500E-7 |

| Quality Control                                                                   | Report                                                                                | Residuals | Parameters |
|-----------------------------------------------------------------------------------|---------------------------------------------------------------------------------------|-----------|------------|
|  | Kinetic constant kd is approaching the limits that can be measured by the instrument. |           |            |
|  | Kinetic constants appear to be uniquely determined.                                   |           |            |
|  | High bulk contributions (RI) found.                                                   |           |            |
|  | Check that sensorgrams have sufficient curvature.                                     |           |            |
|  | Examine the residual plot. Pay attention to systematic and non-random deviations.     |           |            |

**Figure S32.** The SPR sensorgrams, fitting parameters and quality control table of TO-PRO-1 (4 replicates)

- Mitoxantrone

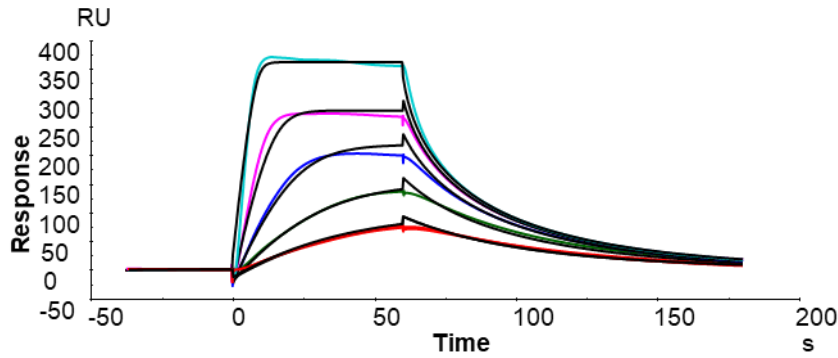

| Curve                   | ka (1/Ms) | kd (1/s) | KD (M)   | Rmax (RU) | Conc (M) |
|-------------------------|-----------|----------|----------|-----------|----------|
|                         | 7.568E+5  | 0.3557   | 4.700E-7 | 388.0     |          |
| Cycle: 3 0.1875 $\mu$ M |           |          |          |           | 1.875E-7 |
| Cycle: 4 0.375 $\mu$ M  |           |          |          |           | 3.750E-7 |
| Cycle: 5 0.75 $\mu$ M   |           |          |          |           | 7.500E-7 |
| Cycle: 6 1.5 $\mu$ M    |           |          |          |           | 1.500E-6 |
| Cycle: 7 3 $\mu$ M      |           |          |          |           | 3.000E-6 |
| Cycle: 8 0.1875 $\mu$ M |           |          |          |           | 1.875E-7 |

| Quality Control | Report                                                                                | Residuals | Parameters |
|-----------------|---------------------------------------------------------------------------------------|-----------|------------|
| ⚠               | Kinetic constant kd is approaching the limits that can be measured by the instrument. |           |            |
| ⚠               | Kinetic constants were difficult to determine.<br>Try to immobilize less ligand.      |           |            |
| ⚠               | High bulk contributions (RI) found.                                                   |           |            |
| ⬇               | Check that sensorgrams have sufficient curvature.                                     |           |            |
| ⬇               | Examine the residual plot. Pay attention to systematic and non-random deviations.     |           |            |

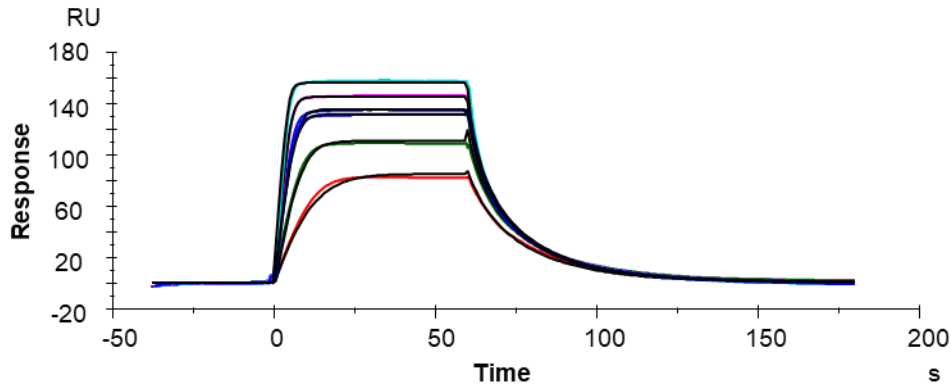

| Curve                | ka (1/Ms) | kd (1/s) | KD (M)   | Rmax (RU) | Conc (M) |
|----------------------|-----------|----------|----------|-----------|----------|
|                      | 7.895E+6  | 1.770    | 2.242E-7 | 185.1     |          |
| Cycle: 2 0.2 $\mu$ M |           |          |          |           | 2.000E-7 |
| Cycle: 3 0.4 $\mu$ M |           |          |          |           | 4.000E-7 |
| Cycle: 4 0.6 $\mu$ M |           |          |          |           | 6.000E-7 |
| Cycle: 5 0.8 $\mu$ M |           |          |          |           | 8.000E-7 |
| Cycle: 6 1 $\mu$ M   |           |          |          |           | 1.000E-6 |
| Cycle: 7 0.6 $\mu$ M |           |          |          |           | 6.000E-7 |

| Quality Control | Report                                                                               | Residuals | Parameters |
|-----------------|--------------------------------------------------------------------------------------|-----------|------------|
| ✖               | Kinetic constant $k_d$ is outside the limits that can be measured by the instrument. |           |            |
| ⚠               | Kinetic constants were difficult to determine. Try to immobilize less ligand.        |           |            |
| ✔               | No significant bulk contributions (RI) found.                                        |           |            |
| ➡               | Check that sensorgrams have sufficient curvature.                                    |           |            |
| ➡               | Examine the residual plot. Pay attention to systematic and non-random deviations.    |           |            |

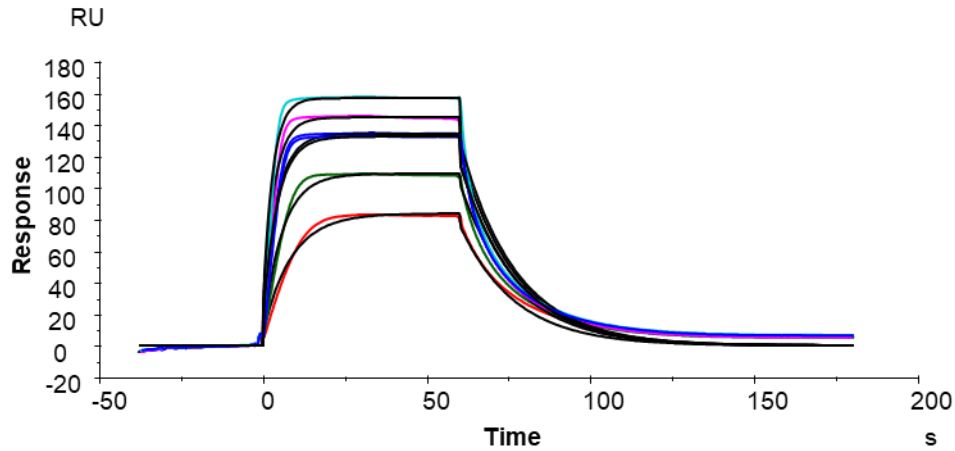

| Curve                                 | $k_a$ (1/Ms) | $k_d$ (1/s) | KD (M)   | Rmax (RU) | Conc (M) |
|---------------------------------------|--------------|-------------|----------|-----------|----------|
|                                       | 2.851E+5     | 0.05927     | 2.079E-7 | 155.9     |          |
| <b>Cycle: 2 0.2 <math>\mu</math>M</b> |              |             |          |           | 2.000E-7 |
| <b>Cycle: 3 0.4 <math>\mu</math>M</b> |              |             |          |           | 4.000E-7 |
| <b>Cycle: 4 0.6 <math>\mu</math>M</b> |              |             |          |           | 6.000E-7 |
| <b>Cycle: 5 0.8 <math>\mu</math>M</b> |              |             |          |           | 8.000E-7 |
| <b>Cycle: 6 1 <math>\mu</math>M</b>   |              |             |          |           | 1.000E-6 |
| <b>Cycle: 7 0.6 <math>\mu</math>M</b> |              |             |          |           | 6.000E-7 |

| Quality Control | Report                                                                            | Residuals | Parameters |
|-----------------|-----------------------------------------------------------------------------------|-----------|------------|
| ✔               | Kinetic constants are within instrument specifications.                           |           |            |
| ✔               | Kinetic constants appear to be uniquely determined.                               |           |            |
| ⚠               | High bulk contributions (RI) found.                                               |           |            |
| ➡               | Check that sensorgrams have sufficient curvature.                                 |           |            |
| ➡               | Examine the residual plot. Pay attention to systematic and non-random deviations. |           |            |

**Figure S33.** The SPR sensorgrams, fitting parameters and quality control table of mitoxantrone (3 replicates)

- DPF m1

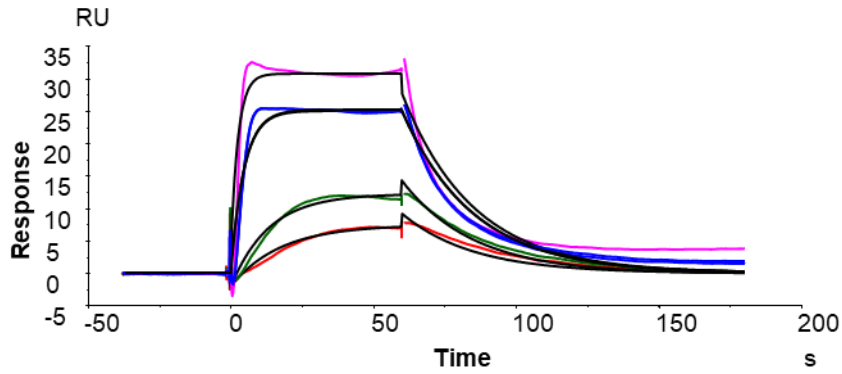

| Curve                 | ka (1/Ms) | kd (1/s) | KD (M)   | Rmax (RU) | Conc (M) |
|-----------------------|-----------|----------|----------|-----------|----------|
|                       | 3.539E+5  | 0.04013  | 1.134E-7 | 30.70     |          |
| Cycle: 3 0.05 $\mu$ M |           |          |          |           | 5.000E-8 |
| Cycle: 4 0.1 $\mu$ M  |           |          |          |           | 1.000E-7 |
| Cycle: 5 0.5 $\mu$ M  |           |          |          |           | 5.000E-7 |
| Cycle: 6 1 $\mu$ M    |           |          |          |           | 1.000E-6 |
| Cycle: 7 0.5 $\mu$ M  |           |          |          |           | 5.000E-7 |

| Quality Control                     | Report                                                                            | Residuals | Parameters |
|-------------------------------------|-----------------------------------------------------------------------------------|-----------|------------|
| <input checked="" type="checkbox"/> | Kinetic constants are within instrument specifications.                           |           |            |
| <input checked="" type="checkbox"/> | Kinetic constants appear to be uniquely determined.                               |           |            |
| <input type="checkbox"/>            | High bulk contributions (R) found.                                                |           |            |
| <input type="checkbox"/>            | Check that sensorgrams have sufficient curvature.                                 |           |            |
| <input type="checkbox"/>            | Examine the residual plot. Pay attention to systematic and non-random deviations. |           |            |

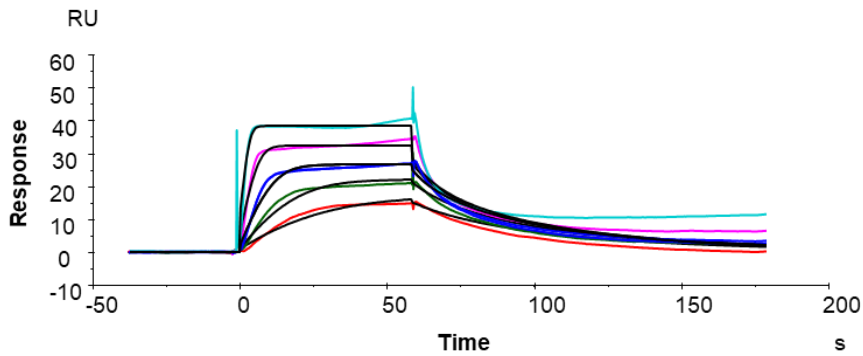

| Curve                  | ka (1/Ms) | kd (1/s) | KD (M)   | Rmax (RU) | Conc (M) |
|------------------------|-----------|----------|----------|-----------|----------|
|                        | 6.407E+5  | 0.06814  | 1.064E-7 | 29.98     |          |
| Cycle: 9 0.125 $\mu$ M |           |          |          |           | 1.250E-7 |
| Cycle: 10 0.25 $\mu$ M |           |          |          |           | 2.500E-7 |
| Cycle: 11 0.5 $\mu$ M  |           |          |          |           | 5.000E-7 |
| Cycle: 12 1 $\mu$ M    |           |          |          |           | 1.000E-6 |
| Cycle: 13 2 $\mu$ M    |           |          |          |           | 2.000E-6 |
| Cycle: 14 0.5 $\mu$ M  |           |          |          |           | 5.000E-7 |

| Quality Control | Report                                                                            | Residuals | Parameters |
|-----------------|-----------------------------------------------------------------------------------|-----------|------------|
| ✓               | Kinetic constants are within instrument specifications.                           |           |            |
| ✓               | Kinetic constants appear to be uniquely determined.                               |           |            |
| ⚠               | High bulk contributions (RI) found.                                               |           |            |
| ➡               | Check that sensorgrams have sufficient curvature.                                 |           |            |
| ➡               | Examine the residual plot. Pay attention to systematic and non-random deviations. |           |            |

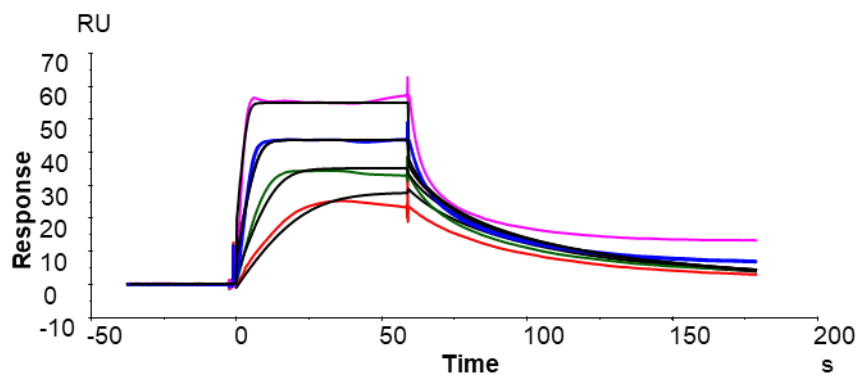

| Curve                                     | ka (1/Ms) | kd (1/s) | KD (M)   | Rmax (RU) | Conc (M) |
|-------------------------------------------|-----------|----------|----------|-----------|----------|
|                                           | 5.968E+5  | 0.07047  | 1.181E-7 | 39.79     |          |
| <b>Cycle: 23 0.3125 <math>\mu</math>M</b> |           |          |          |           | 3.125E-7 |
| <b>Cycle: 24 0.625 <math>\mu</math>M</b>  |           |          |          |           | 6.250E-7 |
| <b>Cycle: 25 1.25 <math>\mu</math>M</b>   |           |          |          |           | 1.250E-6 |
| <b>Cycle: 26 2.5 <math>\mu</math>M</b>    |           |          |          |           | 2.500E-6 |
| <b>Cycle: 28 1.25 <math>\mu</math>M</b>   |           |          |          |           | 1.250E-6 |

| Quality Control | Report                                                                            | Residuals | Parameters |
|-----------------|-----------------------------------------------------------------------------------|-----------|------------|
| ✓               | Kinetic constants are within instrument specifications.                           |           |            |
| ✓               | Kinetic constants appear to be uniquely determined.                               |           |            |
| ⚠               | High bulk contributions (RI) found.                                               |           |            |
| ➡               | Check that sensorgrams have sufficient curvature.                                 |           |            |
| ➡               | Examine the residual plot. Pay attention to systematic and non-random deviations. |           |            |

**Figure S34.** The SPR sensorgrams, fitting parameters and quality control table of DPF m1 (3 replicates)

- DPF p1

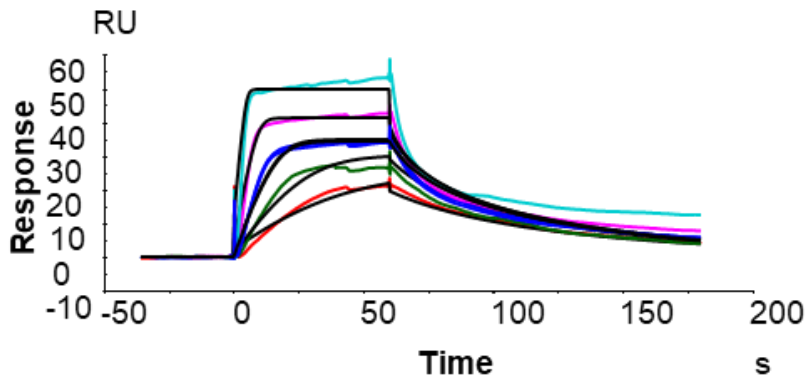

| Curve                   | ka (1/Ms) | kd (1/s) | KD (M)   | Rmax (RU) | Conc (M) |
|-------------------------|-----------|----------|----------|-----------|----------|
|                         | 1.040E+6  | 0.1065   | 1.024E-7 | 41.86     |          |
| Cycle: 16 0.125 $\mu$ M |           |          |          |           | 1.250E-7 |
| Cycle: 17 0.25 $\mu$ M  |           |          |          |           | 2.500E-7 |
| Cycle: 18 0.5 $\mu$ M   |           |          |          |           | 5.000E-7 |
| Cycle: 19 1 $\mu$ M     |           |          |          |           | 1.000E-6 |
| Cycle: 20 2 $\mu$ M     |           |          |          |           | 2.000E-6 |
| Cycle: 21 0.5 $\mu$ M   |           |          |          |           | 5.000E-7 |

| Quality Control | Report                                                                            | Residuals | Parameters |
|-----------------|-----------------------------------------------------------------------------------|-----------|------------|
| ✓               | Kinetic constants are within instrument specifications.                           |           |            |
| !               | Kinetic constants were difficult to determine.                                    |           |            |
| !               | High bulk contributions (RI) found.                                               |           |            |
| →               | Check that sensorgrams have sufficient curvature.                                 |           |            |
| →               | Examine the residual plot. Pay attention to systematic and non-random deviations. |           |            |

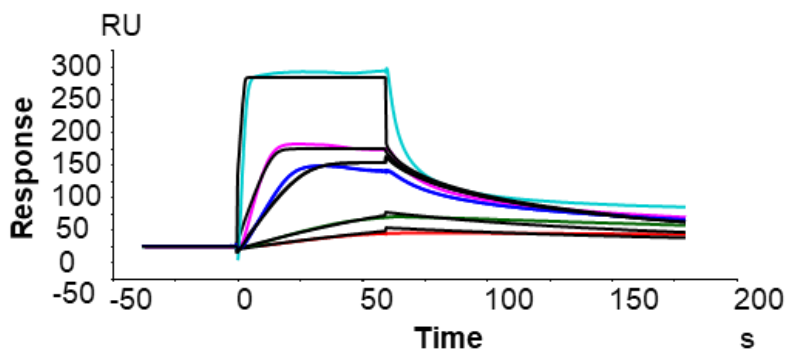



| Curve                  | ka (1/Ms) | kd (1/s) | KD (M)   | Rmax (RU) | Conc (M) |
|------------------------|-----------|----------|----------|-----------|----------|
|                        | 1.300E+6  | 0.1104   | 8.492E-8 | 161.4     |          |
| Cycle: 15 0.05 $\mu$ M |           |          |          |           | 5.000E-8 |
| Cycle: 16 0.1 $\mu$ M  |           |          |          |           | 1.000E-7 |
| Cycle: 17 0.5 $\mu$ M  |           |          |          |           | 5.000E-7 |
| Cycle: 18 1 $\mu$ M    |           |          |          |           | 1.000E-6 |
| Cycle: 19 5 $\mu$ M    |           |          |          |           | 5.000E-6 |
| Cycle: 20 0.5 $\mu$ M  |           |          |          |           | 5.000E-7 |

| Quality Control                     | Report                                                                             | Residuals | Parameters |
|-------------------------------------|------------------------------------------------------------------------------------|-----------|------------|
| <input checked="" type="checkbox"/> | Kinetic constants are within instrument specifications.                            |           |            |
| <input checked="" type="checkbox"/> | Kinetic constants cannot be uniquely determined.<br>Try to immobilize less ligand. |           |            |
| <input checked="" type="checkbox"/> | High bulk contributions (RI) found.                                                |           |            |
| <input type="checkbox"/>            | Check that sensorgrams have sufficient curvature.                                  |           |            |
| <input type="checkbox"/>            | Examine the residual plot. Pay attention to systematic and non-random deviations.  |           |            |

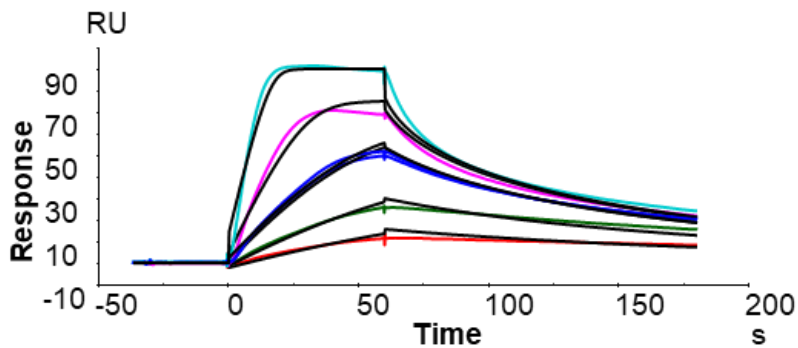

| Curve                 | ka (1/Ms) | kd (1/s) | KD (M)   | Rmax (RU) | Conc (M) |
|-----------------------|-----------|----------|----------|-----------|----------|
|                       | 1.127E+6  | 0.08319  | 7.384E-8 | 84.54     |          |
| Cycle: 9 0.05 $\mu$ M |           |          |          |           | 5.000E-8 |
| Cycle: 10 0.1 $\mu$ M |           |          |          |           | 1.000E-7 |
| Cycle: 11 0.2 $\mu$ M |           |          |          |           | 2.000E-7 |
| Cycle: 12 0.4 $\mu$ M |           |          |          |           | 4.000E-7 |
| Cycle: 13 0.8 $\mu$ M |           |          |          |           | 8.000E-7 |
| Cycle: 14 0.2 $\mu$ M |           |          |          |           | 2.000E-7 |

| Quality Control                     | Report                                                                            | Residuals | Parameters |
|-------------------------------------|-----------------------------------------------------------------------------------|-----------|------------|
| <input checked="" type="checkbox"/> | Kinetic constants are within instrument specifications.                           |           |            |
| <input checked="" type="checkbox"/> | Kinetic constants appear to be uniquely determined.                               |           |            |
| <input checked="" type="checkbox"/> | High bulk contributions (RI) found.                                               |           |            |
| <input type="checkbox"/>            | Check that sensorgrams have sufficient curvature.                                 |           |            |
| <input type="checkbox"/>            | Examine the residual plot. Pay attention to systematic and non-random deviations. |           |            |

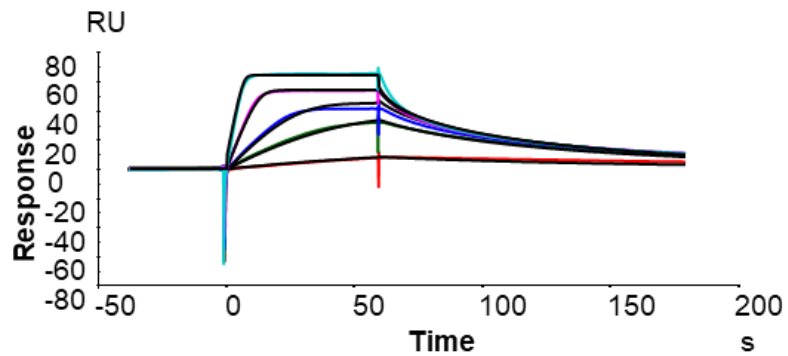

| Curve                                  | ka (1/Ms) | kd (1/s) | KD (M)   | Rmax (RU) | Conc (M) |
|----------------------------------------|-----------|----------|----------|-----------|----------|
|                                        | 2.292E+6  | 0.1273   | 5.553E-8 | 59.69     |          |
| <b>Cycle: 2 0.02 <math>\mu</math>M</b> |           |          |          |           | 2.000E-8 |
| <b>Cycle: 3 0.1 <math>\mu</math>M</b>  |           |          |          |           | 1.000E-7 |
| <b>Cycle: 4 0.2 <math>\mu</math>M</b>  |           |          |          |           | 2.000E-7 |
| <b>Cycle: 5 0.5 <math>\mu</math>M</b>  |           |          |          |           | 5.000E-7 |
| <b>Cycle: 6 1 <math>\mu</math>M</b>    |           |          |          |           | 1.000E-6 |

| Quality Control                     | Report                                                                            | Residuals | Parameters |
|-------------------------------------|-----------------------------------------------------------------------------------|-----------|------------|
| <input checked="" type="checkbox"/> | Kinetic constants are within instrument specifications.                           |           |            |
| <input type="checkbox"/>            | Kinetic constants were difficult to determine.                                    |           |            |
| <input type="checkbox"/>            | High bulk contributions (RI) found.                                               |           |            |
| <input type="checkbox"/>            | Check that sensorgrams have sufficient curvature.                                 |           |            |
| <input type="checkbox"/>            | Examine the residual plot. Pay attention to systematic and non-random deviations. |           |            |

**Figure S35.** The SPR sensorgrams, fitting parameters and quality control table of DPF p1 (4 replicates)

- Furamidine

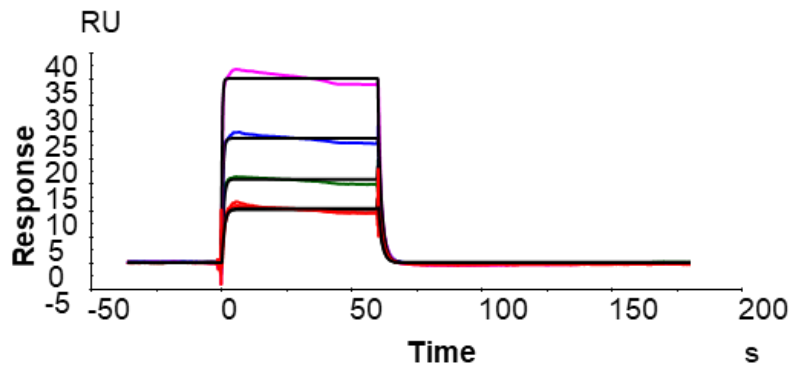

| Curve             | ka (1/Ms) | kd (1/s) | KD (M)   | Rmax (RU) | Conc (M) |
|-------------------|-----------|----------|----------|-----------|----------|
|                   | 2.838E+5  | 0.6950   | 2.449E-6 | 36.08     |          |
| Cycle: 15 1.25 µM |           |          |          |           | 1.250E-6 |
| Cycle: 16 2.5 µM  |           |          |          |           | 2.500E-6 |
| Cycle: 17 5 µM    |           |          |          |           | 5.000E-6 |
| Cycle: 18 10 µM   |           |          |          |           | 1.000E-5 |
| Cycle: 19 1.25 µM |           |          |          |           | 1.250E-6 |

| Quality Control | Report                                                                                | Residuals | Parameters |
|-----------------|---------------------------------------------------------------------------------------|-----------|------------|
| ⚠               | Kinetic constant kd is approaching the limits that can be measured by the instrument. |           |            |
| ✅               | Kinetic constants appear to be uniquely determined.                                   |           |            |
| ⚠               | High bulk contributions (RI) found.                                                   |           |            |
| ➡               | Check that sensorgrams have sufficient curvature.                                     |           |            |
| ➡               | Examine the residual plot. Pay attention to systematic and non-random deviations.     |           |            |

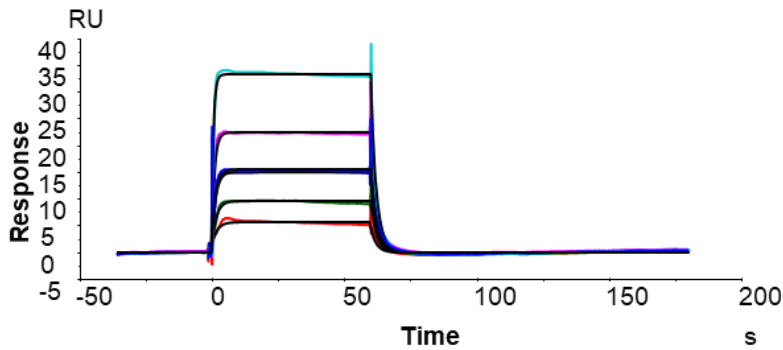

| Curve               | ka (1/Ms) | kd (1/s) | KD (M)   | Rmax (RU) | Conc (M) |
|---------------------|-----------|----------|----------|-----------|----------|
|                     | 1.826E+5  | 0.4720   | 2.585E-6 | 46.17     |          |
| Cycle: 30 0.3125 µM |           |          |          |           | 3.125E-7 |
| Cycle: 31 0.625 µM  |           |          |          |           | 6.250E-7 |
| Cycle: 32 1.25 µM   |           |          |          |           | 1.250E-6 |
| Cycle: 33 2.5 µM    |           |          |          |           | 2.500E-6 |
| Cycle: 34 5 µM      |           |          |          |           | 5.000E-6 |
| Cycle: 35 1.25 µM   |           |          |          |           | 1.250E-6 |

| Quality Control                                                                   | Report                                                                                   | Residuals | Parameters |
|-----------------------------------------------------------------------------------|------------------------------------------------------------------------------------------|-----------|------------|
|  | Kinetic constant $k_d$ is approaching the limits that can be measured by the instrument. |           |            |
|  | Kinetic constants appear to be uniquely determined.                                      |           |            |
|  | No significant bulk contributions (RI) found.                                            |           |            |
|  | Check that sensorgrams have sufficient curvature.                                        |           |            |
|  | Examine the residual plot. Pay attention to systematic and non-random deviations.        |           |            |

**Figure S36.** The SPR sensorgrams, fitting parameters and quality control table of furamidine (2 replicates)

- Ethidium bromide

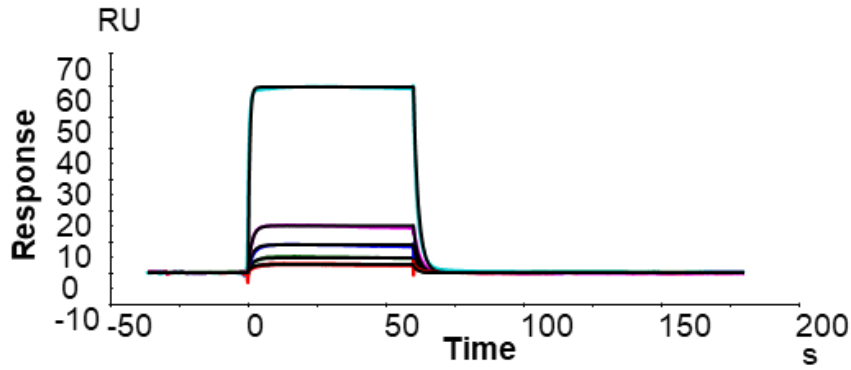

| Curve                    | ka (1/Ms) | kd (1/s) | KD (M)   | Rmax (RU) | Conc (M) |
|--------------------------|-----------|----------|----------|-----------|----------|
|                          | 4.513E+5  | 0.5468   | 1.212E-6 | 76.00     |          |
| Cycle: 27 0.0375 $\mu$ M |           |          |          |           | 3.750E-8 |
| Cycle: 28 0.075 $\mu$ M  |           |          |          |           | 7.500E-8 |
| Cycle: 29 0.15 $\mu$ M   |           |          |          |           | 1.500E-7 |
| Cycle: 30 0.3 $\mu$ M    |           |          |          |           | 3.000E-7 |
| Cycle: 31 3 $\mu$ M      |           |          |          |           | 3.000E-6 |
| Cycle: 32 0.0375 $\mu$ M |           |          |          |           | 3.750E-8 |

| Quality Control | Report                                                                                | Residuals | Parameters |
|-----------------|---------------------------------------------------------------------------------------|-----------|------------|
| ⚠               | Kinetic constant kd is approaching the limits that can be measured by the instrument. |           |            |
| ✅               | Kinetic constants appear to be uniquely determined.                                   |           |            |
| ✅               | No significant bulk contributions (RI) found.                                         |           |            |
| 🔍               | Check that sensorgrams have sufficient curvature.                                     |           |            |
| 🔍               | Examine the residual plot. Pay attention to systematic and non-random deviations.     |           |            |

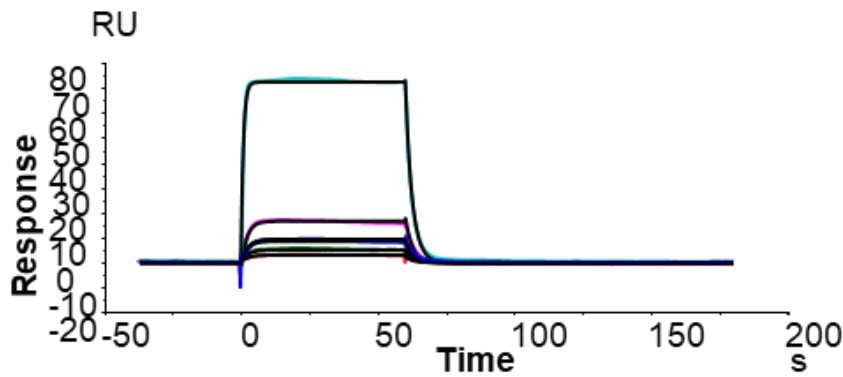

| Curve                    | ka (1/Ms) | kd (1/s) | KD (M)   | Rmax (RU) | Conc (M) |
|--------------------------|-----------|----------|----------|-----------|----------|
|                          | 2.541E+5  | 0.4060   | 1.598E-6 | 112.2     |          |
| Cycle: 22 0.0375 $\mu$ M |           |          |          |           | 3.750E-8 |
| Cycle: 23 0.075 $\mu$ M  |           |          |          |           | 7.500E-8 |
| Cycle: 24 0.15 $\mu$ M   |           |          |          |           | 1.500E-7 |
| Cycle: 25 0.3 $\mu$ M    |           |          |          |           | 3.000E-7 |
| Cycle: 26 3 $\mu$ M      |           |          |          |           | 3.000E-6 |
| Cycle: 27 0.15 $\mu$ M   |           |          |          |           | 1.500E-7 |

| Quality Control | Report                                                                                   | Residuals | Parameters |
|-----------------|------------------------------------------------------------------------------------------|-----------|------------|
| ⚠               | Kinetic constant $k_d$ is approaching the limits that can be measured by the instrument. |           |            |
| ✅               | Kinetic constants appear to be uniquely determined.                                      |           |            |
| ✅               | No significant bulk contributions (Ri) found.                                            |           |            |
| ➡               | Check that sensorgrams have sufficient curvature.                                        |           |            |
| ➡               | Examine the residual plot. Pay attention to systematic and non-random deviations.        |           |            |

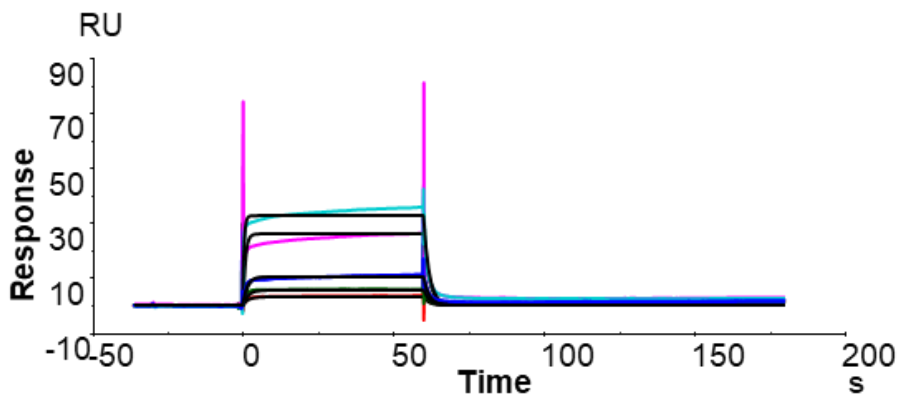

| Curve                  | $k_a$ (1/Ms) | $k_d$ (1/s) | KD (M)   | Rmax (RU) | Conc (M) |
|------------------------|--------------|-------------|----------|-----------|----------|
|                        | 5.564E+5     | 0.5352      | 9.618E-7 | 43.22     |          |
| Cycle: 9 0.075 $\mu$ M |              |             |          |           | 7.500E-8 |
| Cycle: 10 0.15 $\mu$ M |              |             |          |           | 1.500E-7 |
| Cycle: 11 0.3 $\mu$ M  |              |             |          |           | 3.000E-7 |
| Cycle: 12 1.5 $\mu$ M  |              |             |          |           | 1.500E-6 |
| Cycle: 13 3 $\mu$ M    |              |             |          |           | 3.000E-6 |
| Cycle: 14 0.3 $\mu$ M  |              |             |          |           | 3.000E-7 |

| Quality Control | Report                                                                                   | Residuals | Parameters |
|-----------------|------------------------------------------------------------------------------------------|-----------|------------|
| ⚠               | Kinetic constant $k_d$ is approaching the limits that can be measured by the instrument. |           |            |
| ⚠               | Kinetic constants were difficult to determine.                                           |           |            |
| ➡               | Bulk contributions (Ri) were not evaluated. The Ri parameter is set to constant.         |           |            |
| ➡               | Check that sensorgrams have sufficient curvature.                                        |           |            |
| ➡               | Examine the residual plot. Pay attention to systematic and non-random deviations.        |           |            |

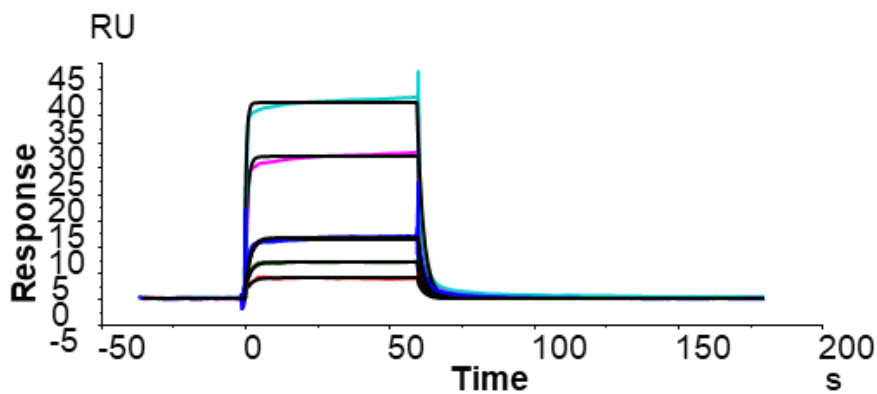

| Curve                   | ka (1/Ms) | kd (1/s) | KD (M)   | Rmax (RU) | Conc (M) |
|-------------------------|-----------|----------|----------|-----------|----------|
|                         | 4.649E+5  | 0.4484   | 9.646E-7 | 42.01     |          |
| Cycle: 37 0.075 $\mu$ M |           |          |          |           | 7.500E-8 |
| Cycle: 38 0.15 $\mu$ M  |           |          |          |           | 1.500E-7 |
| Cycle: 39 0.3 $\mu$ M   |           |          |          |           | 3.000E-7 |
| Cycle: 40 1.5 $\mu$ M   |           |          |          |           | 1.500E-6 |
| Cycle: 41 3 $\mu$ M     |           |          |          |           | 3.000E-6 |
| Cycle: 42 0.3 $\mu$ M   |           |          |          |           | 3.000E-7 |

| Quality Control                                                                   | Report                                                                                | Residuals | Parameters |
|-----------------------------------------------------------------------------------|---------------------------------------------------------------------------------------|-----------|------------|
|  | Kinetic constant kd is approaching the limits that can be measured by the instrument. |           |            |
|  | Kinetic constants appear to be uniquely determined.                                   |           |            |
|  | High bulk contributions (R) found.                                                    |           |            |
|  | Check that sensorgrams have sufficient curvature.                                     |           |            |
|  | Examine the residual plot. Pay attention to systematic and non-random deviations.     |           |            |

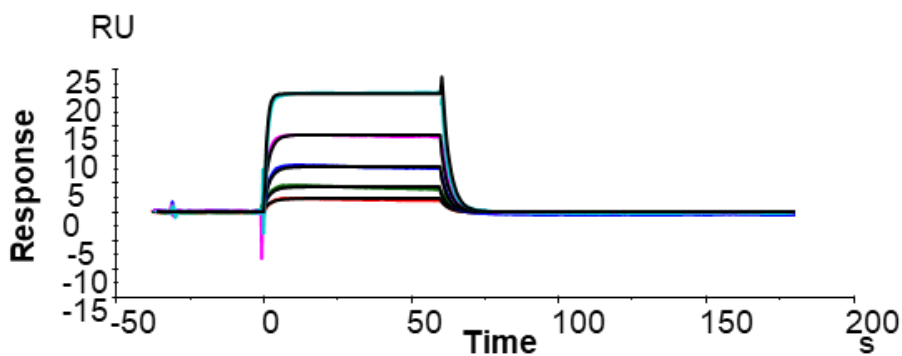

| Quality Control          | Report    | Residuals | Parameters |           |          |
|--------------------------|-----------|-----------|------------|-----------|----------|
|                          |           |           |            |           |          |
| Curve                    | ka (1/Ms) | kd (1/s)  | KD (M)     | Rmax (RU) | Conc (M) |
|                          | 5.104E+5  | 0.3871    | 7.585E-7   | 40.02     |          |
| Cycle: 16 0.0375 $\mu$ M |           |           |            |           | 3.750E-8 |
| Cycle: 17 0.075 $\mu$ M  |           |           |            |           | 7.500E-8 |
| Cycle: 18 0.15 $\mu$ M   |           |           |            |           | 1.500E-7 |
| Cycle: 19 0.3 $\mu$ M    |           |           |            |           | 3.000E-7 |
| Cycle: 20 1.5 $\mu$ M    |           |           |            |           | 1.500E-6 |

| Quality Control                                                                     | Report                                                                                | Residuals | Parameters |
|-------------------------------------------------------------------------------------|---------------------------------------------------------------------------------------|-----------|------------|
|  | Kinetic constant kd is approaching the limits that can be measured by the instrument. |           |            |
|  | Kinetic constants appear to be uniquely determined.                                   |           |            |
|  | High bulk contributions (R) found.                                                    |           |            |
|  | Check that sensorgrams have sufficient curvature.                                     |           |            |
|  | Examine the residual plot. Pay attention to systematic and non-random deviations.     |           |            |

**Figure S37.** The SPR sensorgrams, fitting parameters and quality control table of ethidium bromide (5 replicates)

- H-33258

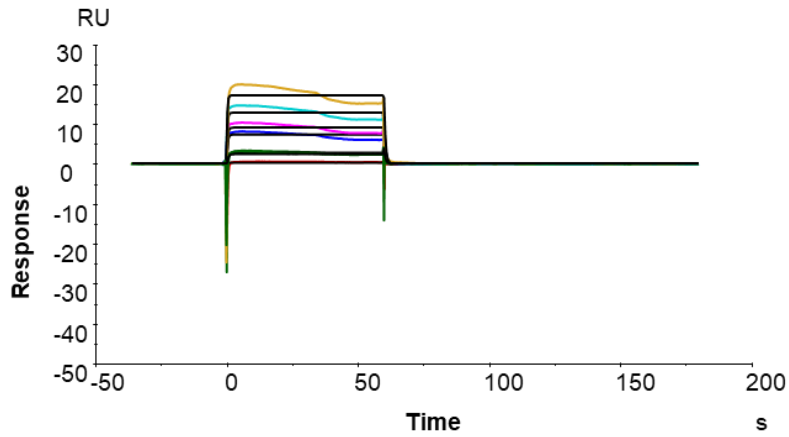

| Curve                 | ka (1/Ms) | kd (1/s) | KD (M)   | Rmax (RU) | Conc (M) |
|-----------------------|-----------|----------|----------|-----------|----------|
|                       | 3.455E+5  | 1.953    | 5.652E-6 | 35.47     |          |
| Cycle: 27 0.2 $\mu$ M |           |          |          |           | 2.000E-7 |
| Cycle: 28 1 $\mu$ M   |           |          |          |           | 1.000E-6 |
| Cycle: 29 2.5 $\mu$ M |           |          |          |           | 2.500E-6 |
| Cycle: 30 3 $\mu$ M   |           |          |          |           | 3.000E-6 |
| Cycle: 31 4 $\mu$ M   |           |          |          |           | 4.000E-6 |
| Cycle: 32 5 $\mu$ M   |           |          |          |           | 5.000E-6 |
| Cycle: 33 1 $\mu$ M   |           |          |          |           | 1.000E-6 |

| Quality Control | Report                                                                            | Residuals | Parameters |
|-----------------|-----------------------------------------------------------------------------------|-----------|------------|
|                 | Kinetic constant kd is outside the limits that can be measured by the instrument. |           |            |
|                 | Kinetic constants cannot be uniquely determined.                                  |           |            |
|                 | High bulk contributions (RI) found.                                               |           |            |
|                 | Check that sensorgrams have sufficient curvature.                                 |           |            |
|                 | Examine the residual plot. Pay attention to systematic and non-random deviations. |           |            |

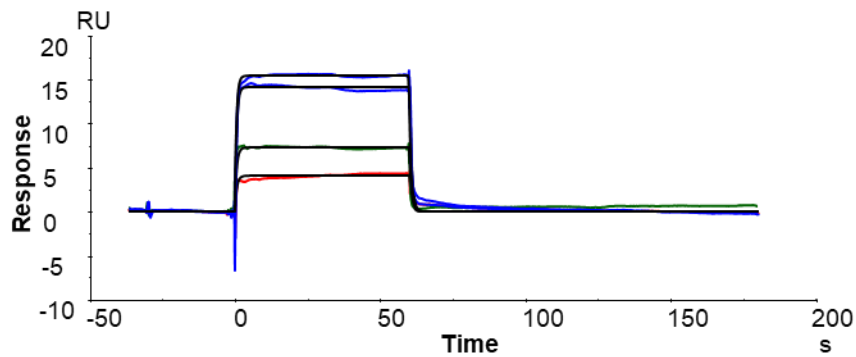



| Curve                                   | ka (1/Ms) | kd (1/s) | KD (M)   | Rmax (RU) | Conc (M) |
|-----------------------------------------|-----------|----------|----------|-----------|----------|
|                                         | 1.578E+5  | 1.389    | 8.800E-6 | 59.36     |          |
| <b>Cycle: 9 0.625 <math>\mu</math>M</b> |           |          |          |           | 6.250E-7 |
| <b>Cycle: 10 1.25 <math>\mu</math>M</b> |           |          |          |           | 1.250E-6 |
| <b>Cycle: 11 2.5 <math>\mu</math>M</b>  |           |          |          |           | 2.500E-6 |
| <b>Cycle: 14 2.5 <math>\mu</math>M</b>  |           |          |          |           | 2.500E-6 |

| Quality Control                                                                   | Report                                                                                | Residuals | Parameters |
|-----------------------------------------------------------------------------------|---------------------------------------------------------------------------------------|-----------|------------|
|  | Kinetic constant kd is approaching the limits that can be measured by the instrument. |           |            |
|  | Kinetic constants appear to be uniquely determined.                                   |           |            |
|  | No significant bulk contributions (RI) found.                                         |           |            |
|  | Check that sensorgrams have sufficient curvature.                                     |           |            |
|  | Examine the residual plot. Pay attention to systematic and non-random deviations.     |           |            |

**Figure S38.** The SPR sensorgrams, fitting parameters and quality control table of H-33258 (2 replicates)

- DMA-3k

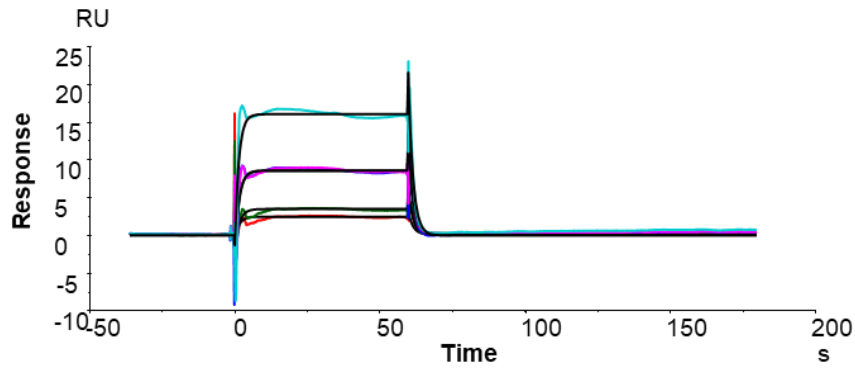

| Curve                   | ka (1/Ms) | kd (1/s) | KD (M)   | Rmax (RU) | Conc (M) |
|-------------------------|-----------|----------|----------|-----------|----------|
|                         | 4975      | 0.6106   | 1.227E-4 | 126.9     |          |
| Cycle: 30 3.125 $\mu$ M |           |          |          |           | 3.125E-6 |
| Cycle: 31 6.25 $\mu$ M  |           |          |          |           | 6.250E-6 |
| Cycle: 32 12.5 $\mu$ M  |           |          |          |           | 1.250E-5 |
| Cycle: 33 15 $\mu$ M    |           |          |          |           | 1.500E-5 |
| Cycle: 34 25 $\mu$ M    |           |          |          |           | 2.500E-5 |

Quality Control Report Residuals Parameters

- ⚠ Kinetic constant kd is approaching the limits that can be measured by the instrument.
- ⚠ Kinetic constants were difficult to determine. Try to immobilize less ligand or increase analyte concentration.
- ⚠ High bulk contributions (RI) found.
- ➡ Check that sensorgrams have sufficient curvature.
- ➡ Examine the residual plot. Pay attention to systematic and non-random deviations.

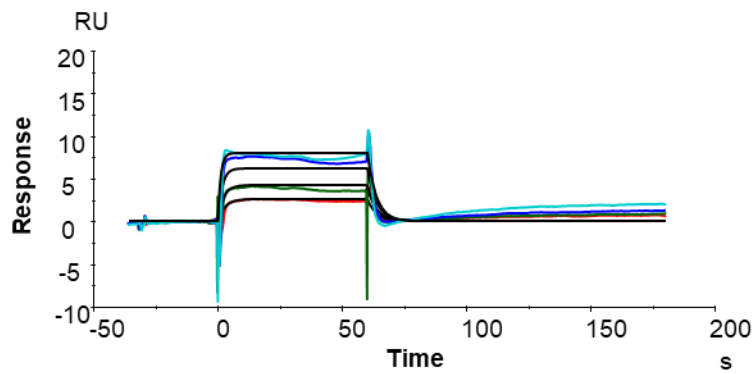

| Curve                   | ka (1/Ms) | kd (1/s) | KD (M)   | Rmax (RU) | Conc (M) |
|-------------------------|-----------|----------|----------|-----------|----------|
|                         | 2.592E+4  | 0.2797   | 1.079E-5 | 11.57     |          |
| Cycle: 30 3.125 $\mu$ M |           |          |          |           | 3.125E-6 |
| Cycle: 31 6.25 $\mu$ M  |           |          |          |           | 6.250E-6 |
| Cycle: 32 12.5 $\mu$ M  |           |          |          |           | 1.250E-5 |
| Cycle: 34 25 $\mu$ M    |           |          |          |           | 2.500E-5 |

| Quality Control | Report                                                                            | Residuals | Parameters |
|-----------------|-----------------------------------------------------------------------------------|-----------|------------|
| ✓               | Kinetic constants are within instrument specifications.                           |           |            |
| ⚠               | Kinetic constants were difficult to determine.                                    |           |            |
| ➔               | Bulk contributions (RI) were not evaluated. The RI parameter is set to constant.  |           |            |
| ➔               | Check that sensorgrams have sufficient curvature.                                 |           |            |
| ➔               | Examine the residual plot. Pay attention to systematic and non-random deviations. |           |            |

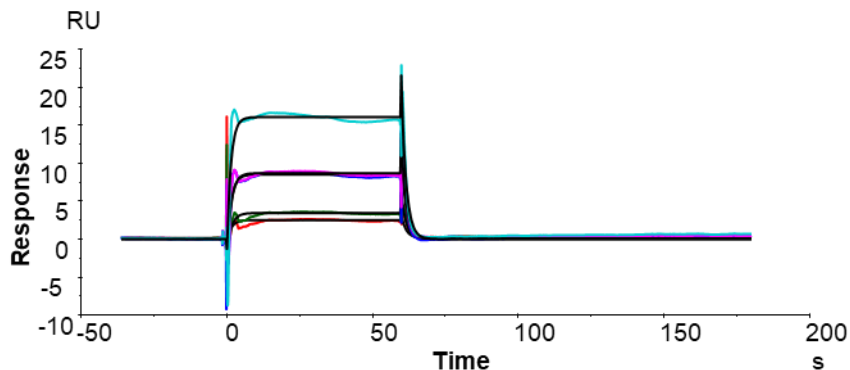

| Curve                   | ka (1/Ms) | kd (1/s) | KD (M)   | Rmax (RU) | Conc (M) |
|-------------------------|-----------|----------|----------|-----------|----------|
|                         | 8868      | 0.6373   | 7.186E-5 | 81.27     |          |
| Cycle: 30 3.125 $\mu$ M |           |          |          |           | 3.125E-6 |
| Cycle: 31 6.25 $\mu$ M  |           |          |          |           | 6.250E-6 |
| Cycle: 32 12.5 $\mu$ M  |           |          |          |           | 1.250E-5 |
| Cycle: 33 15 $\mu$ M    |           |          |          |           | 1.500E-5 |
| Cycle: 34 25 $\mu$ M    |           |          |          |           | 2.500E-5 |

| Quality Control | Report                                                                                | Residuals | Parameters |
|-----------------|---------------------------------------------------------------------------------------|-----------|------------|
| ⚠               | Kinetic constant kd is approaching the limits that can be measured by the instrument. |           |            |
| ✓               | Kinetic constants appear to be uniquely determined.                                   |           |            |
| ⚠               | High bulk contributions (RI) found.                                                   |           |            |
| ➔               | Check that sensorgrams have sufficient curvature.                                     |           |            |
| ➔               | Examine the residual plot. Pay attention to systematic and non-random deviations.     |           |            |

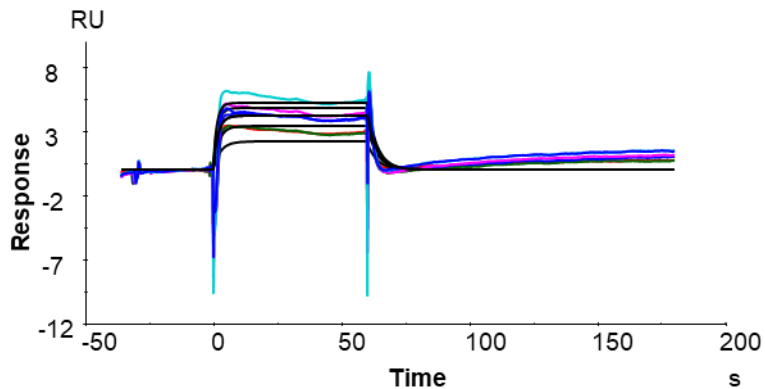

| Curve                | ka (1/Ms) | kd (1/s) | KD (M)   | Rmax (RU) | Conc (M) |
|----------------------|-----------|----------|----------|-----------|----------|
|                      | 1.898E+4  | 0.2615   | 1.378E-5 | 8.135     |          |
| Cycle: 30 5 $\mu$ M  |           |          |          |           | 5.000E-6 |
| Cycle: 31 10 $\mu$ M |           |          |          |           | 1.000E-5 |
| Cycle: 32 15 $\mu$ M |           |          |          |           | 1.500E-5 |
| Cycle: 33 20 $\mu$ M |           |          |          |           | 2.000E-5 |
| Cycle: 34 25 $\mu$ M |           |          |          |           | 2.500E-5 |
| Cycle: 35 15 $\mu$ M |           |          |          |           | 1.500E-5 |

Quality Control Report Residuals Parameters

- Kinetic constants are within instrument specifications.
- Kinetic constants were difficult to determine.
- Bulk contributions (RI) were not evaluated. The RI parameter is set to constant.
- Check that sensorgrams have sufficient curvature.
- Examine the residual plot. Pay attention to systematic and non-random deviations.

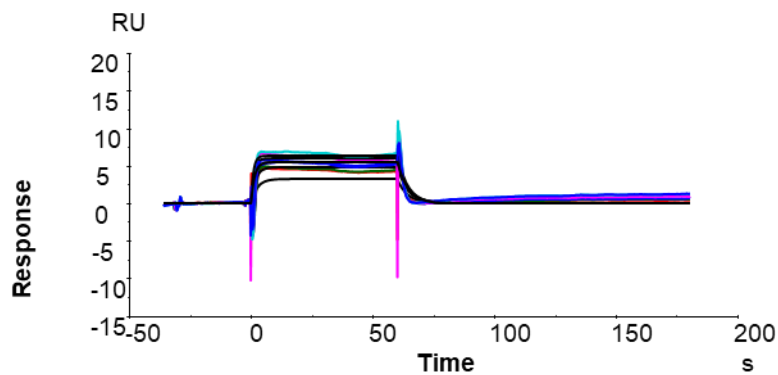

| Curve                | ka (1/Ms) | kd (1/s) | KD (M)   | Rmax (RU) | Conc (M) |
|----------------------|-----------|----------|----------|-----------|----------|
|                      | 3.125E+4  | 0.2376   | 7.605E-6 | 8.251     |          |
| Cycle: 30 5 $\mu$ M  |           |          |          |           | 5.000E-6 |
| Cycle: 31 10 $\mu$ M |           |          |          |           | 1.000E-5 |
| Cycle: 32 15 $\mu$ M |           |          |          |           | 1.500E-5 |
| Cycle: 33 20 $\mu$ M |           |          |          |           | 2.000E-5 |
| Cycle: 34 25 $\mu$ M |           |          |          |           | 2.500E-5 |
| Cycle: 35 15 $\mu$ M |           |          |          |           | 1.500E-5 |

| Quality Control | Report                                                                            | Residuals | Parameters |
|-----------------|-----------------------------------------------------------------------------------|-----------|------------|
| ✓               | Kinetic constants are within instrument specifications.                           |           |            |
| !               | Kinetic constants were difficult to determine.                                    |           |            |
| →               | Bulk contributions (RI) were not evaluated. The RI parameter is set to constant.  |           |            |
| →               | Check that sensorgrams have sufficient curvature.                                 |           |            |
| →               | Examine the residual plot. Pay attention to systematic and non-random deviations. |           |            |

**Figure S39.** The SPR sensorgrams, fitting parameters and quality control table of DMA-3k (5 replicates)

- DMA-3I

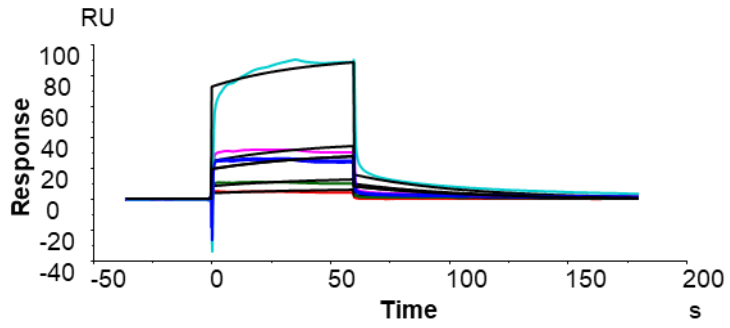

| Curve                  | ka (1/Ms) | kd (1/s) | KD (M)   | Rmax (RU) | Conc (M) |
|------------------------|-----------|----------|----------|-----------|----------|
|                        | 139.6     | 0.02166  | 1.552E-4 | 145.9     |          |
| Cycle: 9 3.125 $\mu$ M |           |          |          |           | 3.125E-6 |
| Cycle: 10 6.25 $\mu$ M |           |          |          |           | 6.250E-6 |
| Cycle: 11 12.5 $\mu$ M |           |          |          |           | 1.250E-5 |
| Cycle: 12 15 $\mu$ M   |           |          |          |           | 1.500E-5 |
| Cycle: 13 25 $\mu$ M   |           |          |          |           | 2.500E-5 |
| Cycle: 14 12.5 $\mu$ M |           |          |          |           | 1.250E-5 |

Quality Control | Report | Residuals | Parameters

- ✘ Kinetic constant ka is outside the limits that can be measured by the instrument.
- ✘ Kinetic constants cannot be uniquely determined. Try to immobilize less ligand or increase analyte concentration.
- ! High bulk contributions (R) found.
- ➡ Check that sensorgrams have sufficient curvature.
- ➡ Examine the residual plot. Pay attention to systematic and non-random deviations.

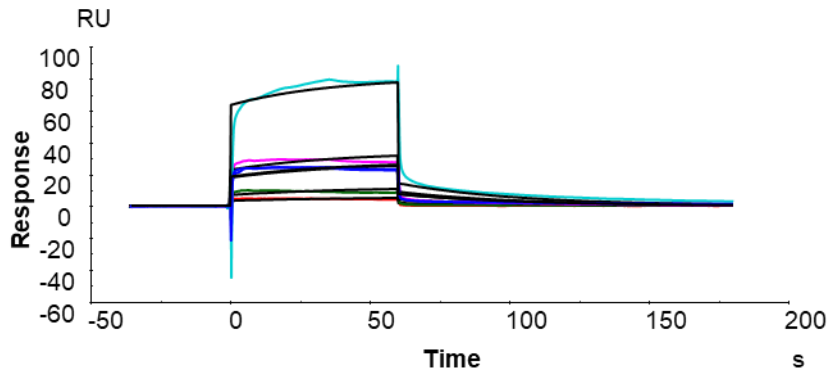

| Curve                  | ka (1/Ms) | kd (1/s) | KD (M)   | Rmax (RU) | Conc (M) |
|------------------------|-----------|----------|----------|-----------|----------|
|                        | 177.3     | 0.02337  | 1.318E-4 | 109.9     |          |
| Cycle: 9 3.125 $\mu$ M |           |          |          |           | 3.125E-6 |
| Cycle: 10 6.25 $\mu$ M |           |          |          |           | 6.250E-6 |
| Cycle: 11 12.5 $\mu$ M |           |          |          |           | 1.250E-5 |
| Cycle: 12 15 $\mu$ M   |           |          |          |           | 1.500E-5 |
| Cycle: 13 25 $\mu$ M   |           |          |          |           | 2.500E-5 |
| Cycle: 14 12.5 $\mu$ M |           |          |          |           | 1.250E-5 |

| Quality Control | Report                                                                                                               | Residuals | Parameters |
|-----------------|----------------------------------------------------------------------------------------------------------------------|-----------|------------|
|                 | Kinetic constant ka is outside the limits that can be measured by the instrument.                                    |           |            |
|                 | Kinetic constants cannot be uniquely determined.<br>Try to immobilize less ligand or increase analyte concentration. |           |            |
|                 | High bulk contributions (RI) found.                                                                                  |           |            |
|                 | Check that sensorgrams have sufficient curvature.                                                                    |           |            |
|                 | Examine the residual plot. Pay attention to systematic and non-random deviations.                                    |           |            |

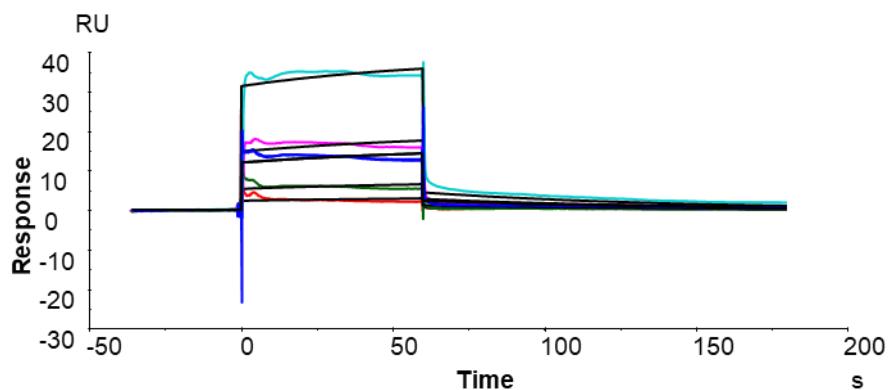

| Curve                                   | ka (1/Ms) | kd (1/s) | KD (M)   | Rmax (RU) | Conc (M) |
|-----------------------------------------|-----------|----------|----------|-----------|----------|
|                                         | 128.9     | 0.01214  | 9.419E-5 | 35.45     |          |
| <b>Cycle: 9 3.125 <math>\mu</math>M</b> |           |          |          |           | 3.125E-6 |
| <b>Cycle: 10 6.25 <math>\mu</math>M</b> |           |          |          |           | 6.250E-6 |
| <b>Cycle: 11 12.5 <math>\mu</math>M</b> |           |          |          |           | 1.250E-5 |
| <b>Cycle: 12 15 <math>\mu</math>M</b>   |           |          |          |           | 1.500E-5 |
| <b>Cycle: 13 25 <math>\mu</math>M</b>   |           |          |          |           | 2.500E-5 |
| <b>Cycle: 14 12.5 <math>\mu</math>M</b> |           |          |          |           | 1.250E-5 |

| Quality Control | Report                                                                                                               | Residuals | Parameters |
|-----------------|----------------------------------------------------------------------------------------------------------------------|-----------|------------|
|                 | Kinetic constant ka is outside the limits that can be measured by the instrument.                                    |           |            |
|                 | Kinetic constants cannot be uniquely determined.<br>Try to immobilize less ligand or increase analyte concentration. |           |            |
|                 | High bulk contributions (RI) found.                                                                                  |           |            |
|                 | Check that sensorgrams have sufficient curvature.                                                                    |           |            |
|                 | Examine the residual plot. Pay attention to systematic and non-random deviations.                                    |           |            |

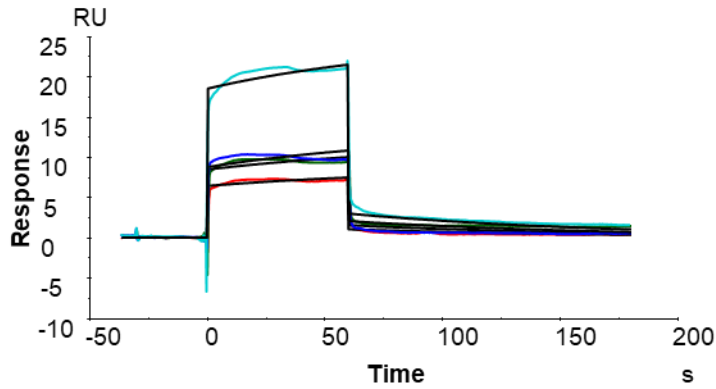

| Curve                | ka (1/Ms) | kd (1/s) | KD (M)   | Rmax (RU) | Conc (M) |
|----------------------|-----------|----------|----------|-----------|----------|
|                      | 194.2     | 0.008890 | 4.577E-5 | 29.41     |          |
| Cycle: 9 4 $\mu$ M   |           |          |          |           | 4.000E-6 |
| Cycle: 10 6 $\mu$ M  |           |          |          |           | 6.000E-6 |
| Cycle: 11 8 $\mu$ M  |           |          |          |           | 8.000E-6 |
| Cycle: 13 12 $\mu$ M |           |          |          |           | 1.200E-5 |

| Quality Control                       | Report                                                                                                               | Residuals | Parameters |
|---------------------------------------|----------------------------------------------------------------------------------------------------------------------|-----------|------------|
| <span style="color: red;">✘</span>    | Kinetic constant ka is outside the limits that can be measured by the instrument.                                    |           |            |
| <span style="color: red;">✘</span>    | Kinetic constants cannot be uniquely determined.<br>Try to immobilize less ligand or increase analyte concentration. |           |            |
| <span style="color: yellow;">!</span> | High bulk contributions (RI) found.                                                                                  |           |            |
| <span style="color: blue;">➔</span>   | Check that sensograms have sufficient curvature.                                                                     |           |            |
| <span style="color: blue;">➔</span>   | Examine the residual plot. Pay attention to systematic and non-random deviations.                                    |           |            |

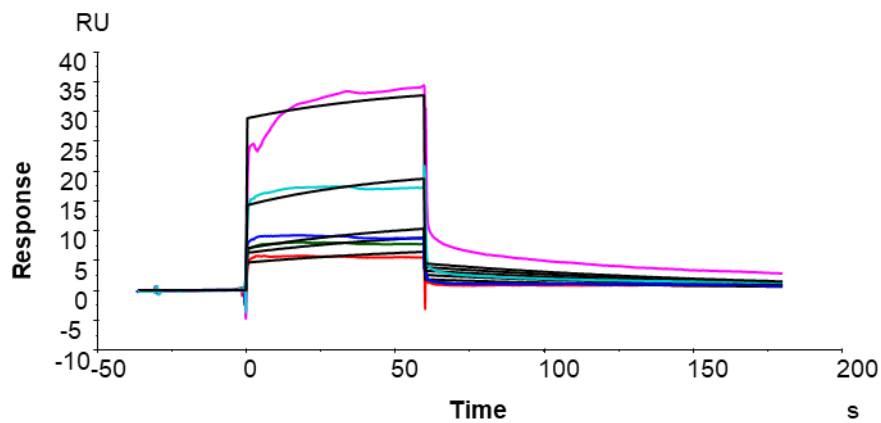



| Curve                                 | ka (1/Ms) | kd (1/s) | KD (M)   | Rmax (RU) | Conc (M) |
|---------------------------------------|-----------|----------|----------|-----------|----------|
|                                       | 907.4     | 0.009299 | 1.025E-5 | 11.78     |          |
| <b>Cycle: 9 4 <math>\mu</math>M</b>   |           |          |          |           | 4.000E-6 |
| <b>Cycle: 10 6 <math>\mu</math>M</b>  |           |          |          |           | 6.000E-6 |
| <b>Cycle: 11 8 <math>\mu</math>M</b>  |           |          |          |           | 8.000E-6 |
| <b>Cycle: 12 10 <math>\mu</math>M</b> |           |          |          |           | 1.000E-5 |
| <b>Cycle: 13 12 <math>\mu</math>M</b> |           |          |          |           | 1.200E-5 |

| Quality Control                                                                   | Report                                                                                                               | Residuals | Parameters |
|-----------------------------------------------------------------------------------|----------------------------------------------------------------------------------------------------------------------|-----------|------------|
|  | Kinetic constant ka is approaching the limits that can be measured by the instrument.                                |           |            |
|  | Kinetic constants cannot be uniquely determined.<br>Try to immobilize less ligand or increase analyte concentration. |           |            |
|  | High bulk contributions (RI) found.                                                                                  |           |            |
|  | Check that sensorgrams have sufficient curvature.                                                                    |           |            |
|  | Examine the residual plot. Pay attention to systematic and non-random deviations.                                    |           |            |

**Figure S40.** The SPR sensorgrams, fitting parameters and quality control table of DMA-3I (5 replicates)

- DMA-3u

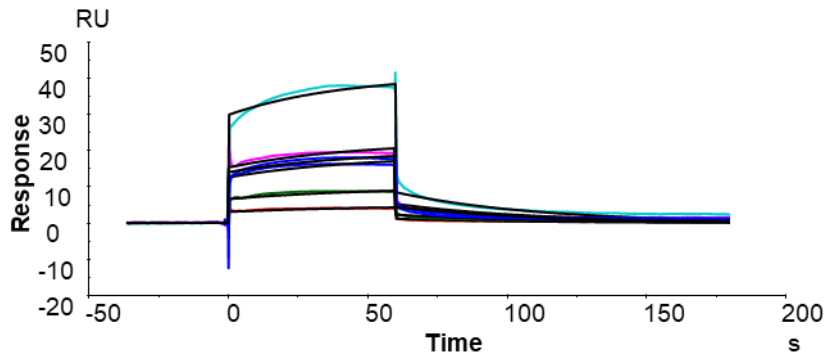

| Curve                   | ka (1/Ms) | kd (1/s) | KD (M)   | Rmax (RU) | Conc (M) |
|-------------------------|-----------|----------|----------|-----------|----------|
|                         | 184.5     | 0.01986  | 1.077E-4 | 58.46     |          |
| Cycle: 23 3.125 $\mu$ M |           |          |          |           | 3.125E-6 |
| Cycle: 24 6.25 $\mu$ M  |           |          |          |           | 6.250E-6 |
| Cycle: 25 12.5 $\mu$ M  |           |          |          |           | 1.250E-5 |
| Cycle: 26 15 $\mu$ M    |           |          |          |           | 1.500E-5 |
| Cycle: 27 25 $\mu$ M    |           |          |          |           | 2.500E-5 |
| Cycle: 28 12.5 $\mu$ M  |           |          |          |           | 1.250E-5 |

Quality Control Report Residuals Parameters

- ✘ Kinetic constant ka is outside the limits that can be measured by the instrument.
- ! Kinetic constants were difficult to determine.  
Try to immobilize less ligand or increase analyte concentration.
- ! High bulk contributions (RI) found.
- ↶ Check that sensorgrams have sufficient curvature.
- ↷ Examine the residual plot. Pay attention to systematic and non-random deviations.

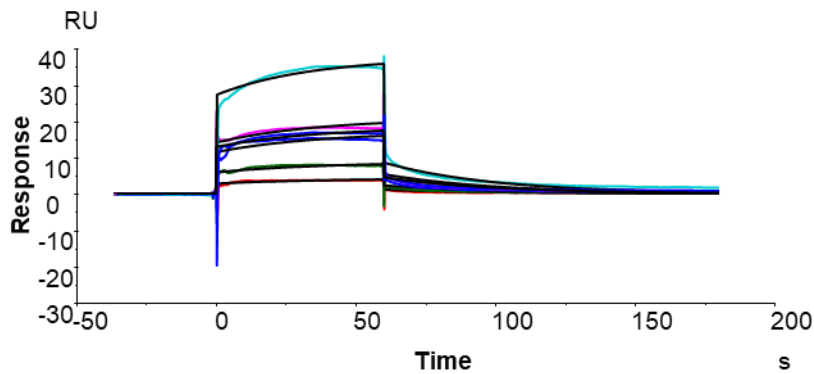

| Curve                   | ka (1/Ms) | kd (1/s) | KD (M)   | Rmax (RU) | Conc (M) |
|-------------------------|-----------|----------|----------|-----------|----------|
|                         | 197.0     | 0.02510  | 1.274E-4 | 62.50     |          |
| Cycle: 23 3.125 $\mu$ M |           |          |          |           | 3.125E-6 |
| Cycle: 24 6.25 $\mu$ M  |           |          |          |           | 6.250E-6 |
| Cycle: 25 12.5 $\mu$ M  |           |          |          |           | 1.250E-5 |
| Cycle: 26 15 $\mu$ M    |           |          |          |           | 1.500E-5 |
| Cycle: 27 25 $\mu$ M    |           |          |          |           | 2.500E-5 |
| Cycle: 28 12.5 $\mu$ M  |           |          |          |           | 1.250E-5 |

Quality Control Report Residuals Parameters

- ✘ Kinetic constant ka is outside the limits that can be measured by the instrument.
- ✘ Kinetic constants cannot be uniquely determined.  
Try to immobilize less ligand or increase analyte concentration.
- ! High bulk contributions (RI) found.
- ➡ Check that sensorgrams have sufficient curvature.
- ➡ Examine the residual plot. Pay attention to systematic and non-random deviations.

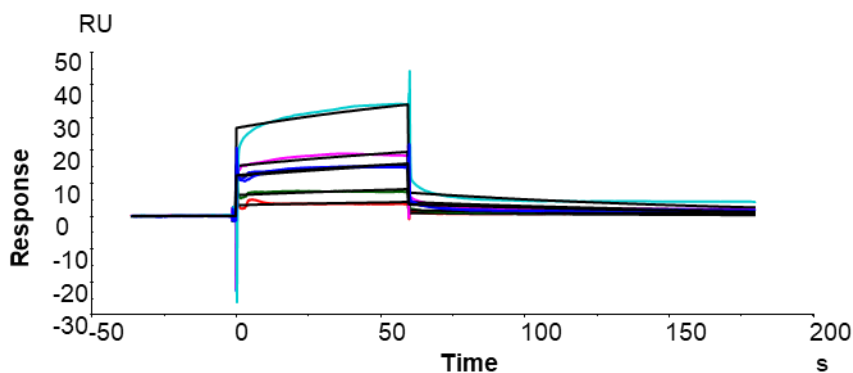

| Curve                   | ka (1/Ms) | kd (1/s) | KD (M)   | Rmax (RU) | Conc (M) |
|-------------------------|-----------|----------|----------|-----------|----------|
|                         | 20.45     | 0.008325 | 4.071E-4 | 299.2     |          |
| Cycle: 23 3.125 $\mu$ M |           |          |          |           | 3.125E-6 |
| Cycle: 24 6.25 $\mu$ M  |           |          |          |           | 6.250E-6 |
| Cycle: 25 12.5 $\mu$ M  |           |          |          |           | 1.250E-5 |
| Cycle: 26 15 $\mu$ M    |           |          |          |           | 1.500E-5 |
| Cycle: 27 25 $\mu$ M    |           |          |          |           | 2.500E-5 |
| Cycle: 28 12.5 $\mu$ M  |           |          |          |           | 1.250E-5 |

Quality Control Report Residuals Parameters

- ✘ Kinetic constant ka is outside the limits that can be measured by the instrument.
- ✘ Kinetic constants cannot be uniquely determined.  
Try to immobilize less ligand or increase analyte concentration.
- ! High bulk contributions (RI) found.
- ➡ Check that sensorgrams have sufficient curvature.
- ➡ Examine the residual plot. Pay attention to systematic and non-random deviations.

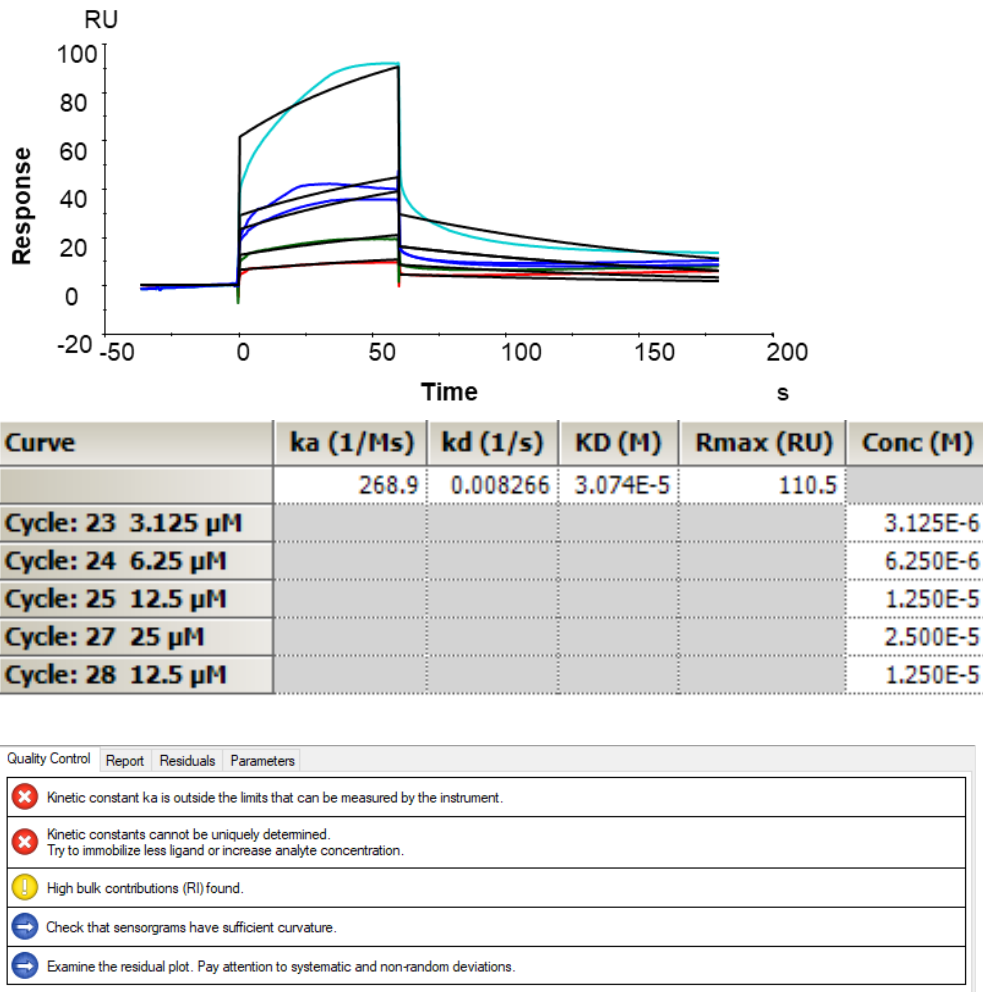

**Figure S41.** The SPR sensorgrams, fitting parameters and quality control table of DMA-3u (4 replicates)

- DMA-3v

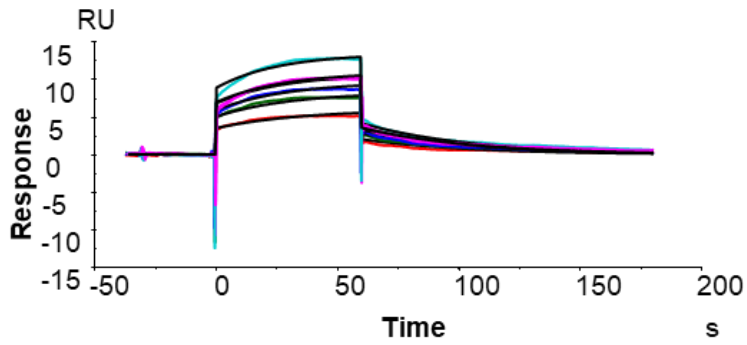

| Curve                   | ka (1/Ms) | kd (1/s) | KD (M)   | Rmax (RU) | Conc (M) |
|-------------------------|-----------|----------|----------|-----------|----------|
|                         | 681.6     | 0.02222  | 3.259E-5 | 10.62     |          |
| Cycle: 37 10 $\mu$ M    |           |          |          |           | 1.000E-5 |
| Cycle: 38 15 $\mu$ M    |           |          |          |           | 1.500E-5 |
| Cycle: 39 17.95 $\mu$ M |           |          |          |           | 1.795E-5 |
| Cycle: 40 20 $\mu$ M    |           |          |          |           | 2.000E-5 |
| Cycle: 41 25 $\mu$ M    |           |          |          |           | 2.500E-5 |
| Cycle: 42 20 $\mu$ M    |           |          |          |           | 2.000E-5 |

Quality Control Report Residuals Parameters

- ⚠ Kinetic constant ka is approaching the limits that can be measured by the instrument.
- ✖ Kinetic constants cannot be uniquely determined. Try to immobilize less ligand or increase analyte concentration.
- ⚠ High bulk contributions (RI) found.
- ➡ Check that sensorgrams have sufficient curvature.
- ➡ Examine the residual plot. Pay attention to systematic and non-random deviations.

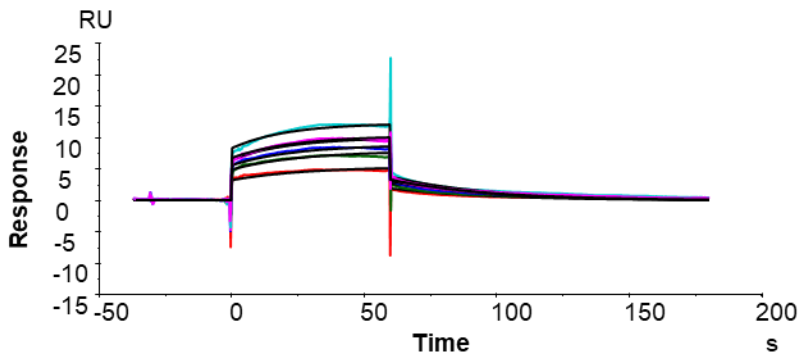

| Curve                   | ka (1/Ms) | kd (1/s) | KD (M)   | Rmax (RU) | Conc (M) |
|-------------------------|-----------|----------|----------|-----------|----------|
|                         | 842.2     | 0.02740  | 3.253E-5 | 9.232     |          |
| Cycle: 37 10 $\mu$ M    |           |          |          |           | 1.000E-5 |
| Cycle: 38 15 $\mu$ M    |           |          |          |           | 1.500E-5 |
| Cycle: 39 17.95 $\mu$ M |           |          |          |           | 1.795E-5 |
| Cycle: 40 20 $\mu$ M    |           |          |          |           | 2.000E-5 |
| Cycle: 41 25 $\mu$ M    |           |          |          |           | 2.500E-5 |
| Cycle: 42 20 $\mu$ M    |           |          |          |           | 2.000E-5 |

| Quality Control | Report                                                                                                               | Residuals | Parameters |
|-----------------|----------------------------------------------------------------------------------------------------------------------|-----------|------------|
| !               | Kinetic constant $k_a$ is approaching the limits that can be measured by the instrument.                             |           |            |
| ✗               | Kinetic constants cannot be uniquely determined.<br>Try to immobilize less ligand or increase analyte concentration. |           |            |
| !               | High bulk contributions (RI) found.                                                                                  |           |            |
| →               | Check that sensorgrams have sufficient curvature.                                                                    |           |            |
| →               | Examine the residual plot. Pay attention to systematic and non-random deviations.                                    |           |            |

**Figure S42.** The SPR sensorgrams, fitting parameters and quality control table of DMA-3v (2 replicates)

- DMA-3q

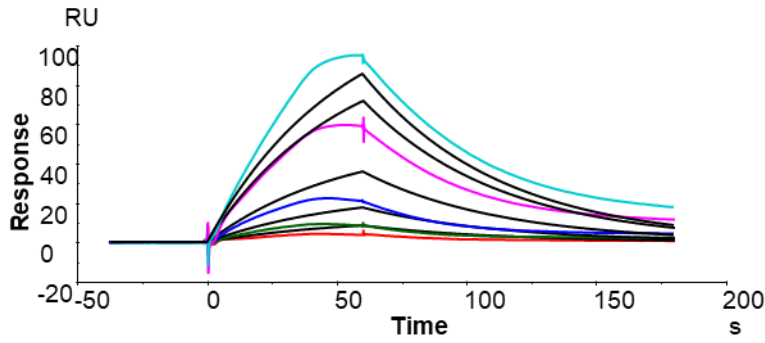

| Curve                   | $k_a$ (1/Ms) | $k_d$ (1/s) | $K_D$ (M) | Rmax (RU) | Conc (M) |
|-------------------------|--------------|-------------|-----------|-----------|----------|
|                         | 24.52        | 0.01915     | 7.810E-4  | 6591      |          |
| Cycle: 2 1.5625 $\mu$ M |              |             |           |           | 1.563E-6 |
| Cycle: 3 3.125 $\mu$ M  |              |             |           |           | 3.125E-6 |
| Cycle: 4 6.25 $\mu$ M   |              |             |           |           | 6.250E-6 |
| Cycle: 5 12.5 $\mu$ M   |              |             |           |           | 1.250E-5 |
| Cycle: 6 15 $\mu$ M     |              |             |           |           | 1.500E-5 |

| Quality Control | Report                                                                                                             | Residuals | Parameters |
|-----------------|--------------------------------------------------------------------------------------------------------------------|-----------|------------|
|                 | Kinetic constant $k_a$ is outside the limits that can be measured by the instrument.                               |           |            |
|                 | Kinetic constants were difficult to determine.<br>Try to immobilize less ligand or increase analyte concentration. |           |            |
|                 | Bulk contributions (RI) were not evaluated. The RI parameter is set to constant.                                   |           |            |
|                 | Check that sensorgrams have sufficient curvature.                                                                  |           |            |
|                 | Examine the residual plot. Pay attention to systematic and non-random deviations.                                  |           |            |

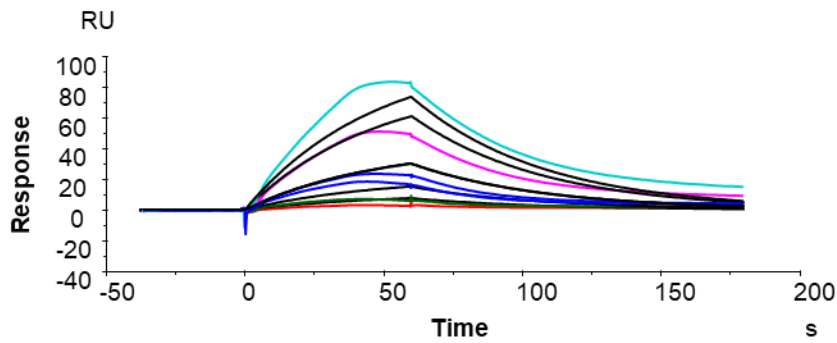

| Curve                   | ka (1/Ms) | kd (1/s) | KD (M)   | Rmax (RU) | Conc (M) |
|-------------------------|-----------|----------|----------|-----------|----------|
|                         | 27.17     | 0.01828  | 6.727E-4 | 4540      |          |
| Cycle: 2 1.5625 $\mu$ M |           |          |          |           | 1.563E-6 |
| Cycle: 3 3.125 $\mu$ M  |           |          |          |           | 3.125E-6 |
| Cycle: 4 6.25 $\mu$ M   |           |          |          |           | 6.250E-6 |
| Cycle: 5 12.5 $\mu$ M   |           |          |          |           | 1.250E-5 |
| Cycle: 6 15 $\mu$ M     |           |          |          |           | 1.500E-5 |
| Cycle: 7 6.25 $\mu$ M   |           |          |          |           | 6.250E-6 |

Quality Control [Report](#) [Residuals](#) [Parameters](#)

- ✘ Kinetic constant ka is outside the limits that can be measured by the instrument.
- ! Kinetic constants were difficult to determine.  
Try to immobilize less ligand or increase analyte concentration.
- ! High bulk contributions (RI) found.
- ➔ Check that sensorgrams have sufficient curvature.
- ➔ Examine the residual plot. Pay attention to systematic and non-random deviations.

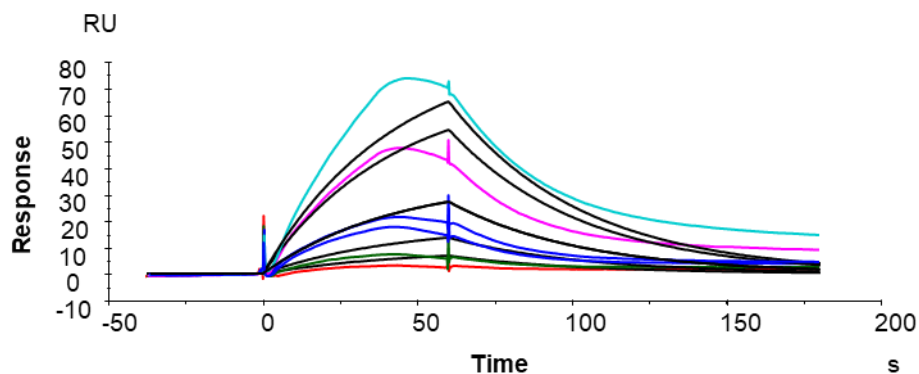

| Curve                   | ka (1/Ms) | kd (1/s) | KD (M)   | Rmax (RU) | Conc (M) |
|-------------------------|-----------|----------|----------|-----------|----------|
|                         | 29.78     | 0.02342  | 7.863E-4 | 4584      |          |
| Cycle: 2 1.5625 $\mu$ M |           |          |          |           | 1.563E-6 |
| Cycle: 3 3.125 $\mu$ M  |           |          |          |           | 3.125E-6 |
| Cycle: 4 6.25 $\mu$ M   |           |          |          |           | 6.250E-6 |
| Cycle: 5 12.5 $\mu$ M   |           |          |          |           | 1.250E-5 |
| Cycle: 6 15 $\mu$ M     |           |          |          |           | 1.500E-5 |
| Cycle: 7 6.25 $\mu$ M   |           |          |          |           | 6.250E-6 |



- ✘ Kinetic constant  $k_a$  is outside the limits that can be measured by the instrument.
- ! Kinetic constants were difficult to determine.  
Try to immobilize less ligand or increase analyte concentration.
- ➔ Bulk contributions (RI) were not evaluated. The RI parameter is set to constant.
- ➔ Check that sensorgrams have sufficient curvature.
- ➔ Examine the residual plot. Pay attention to systematic and non-random deviations.

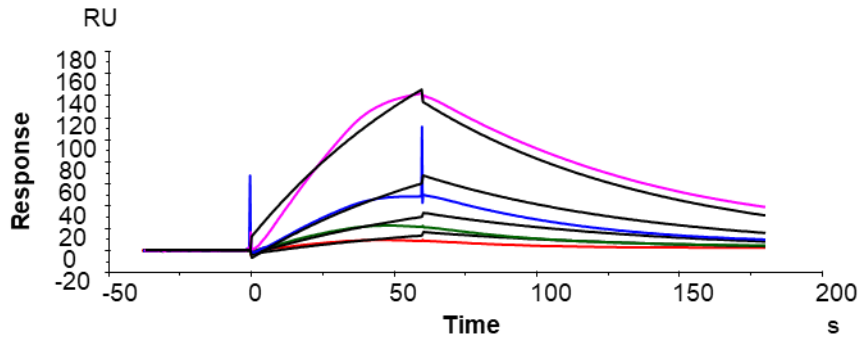

| Curve                   | $k_a$ (1/Ms) | $k_d$ (1/s) | $KD$ (M) | $R_{max}$ (RU) | Conc (M) |
|-------------------------|--------------|-------------|----------|----------------|----------|
|                         | 16.72        | 0.01213     | 7.257E-4 | 1.509E+4       |          |
| Cycle: 2 1.5625 $\mu$ M |              |             |          |                | 1.563E-6 |
| Cycle: 3 3.125 $\mu$ M  |              |             |          |                | 3.125E-6 |
| Cycle: 4 6.25 $\mu$ M   |              |             |          |                | 6.250E-6 |
| Cycle: 5 12.5 $\mu$ M   |              |             |          |                | 1.250E-5 |

- ✘ Kinetic constant  $k_a$  is outside the limits that can be measured by the instrument.
- ✔ Kinetic constants appear to be uniquely determined.
- ! High bulk contributions (RI) found.
- ➔ Check that sensorgrams have sufficient curvature.
- ➔ Examine the residual plot. Pay attention to systematic and non-random deviations.

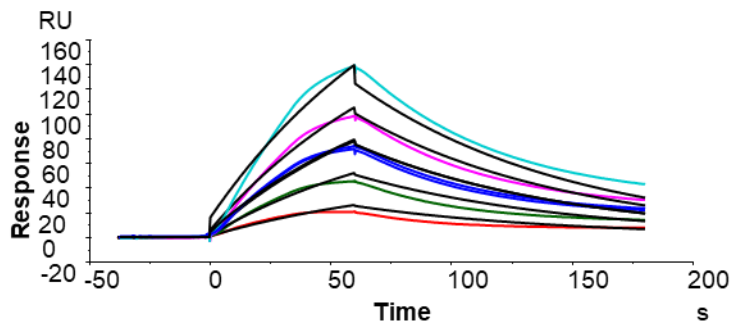

| Curve               | ka (1/Ms) | kd (1/s) | KD (M)   | Rmax (RU) | Conc (M) |
|---------------------|-----------|----------|----------|-----------|----------|
|                     | 14.68     | 0.01146  | 7.811E-4 | 1.987E+4  |          |
| Cycle: 2 2 $\mu$ M  |           |          |          |           | 2.000E-6 |
| Cycle: 3 4 $\mu$ M  |           |          |          |           | 4.000E-6 |
| Cycle: 4 6 $\mu$ M  |           |          |          |           | 6.000E-6 |
| Cycle: 5 8 $\mu$ M  |           |          |          |           | 8.000E-6 |
| Cycle: 6 10 $\mu$ M |           |          |          |           | 1.000E-5 |
| Cycle: 7 6 $\mu$ M  |           |          |          |           | 6.000E-6 |

| Quality Control                                                                   | Report                                                                            | Residuals | Parameters |
|-----------------------------------------------------------------------------------|-----------------------------------------------------------------------------------|-----------|------------|
|  | Kinetic constant ka is outside the limits that can be measured by the instrument. |           |            |
|  | Kinetic constants appear to be uniquely determined.                               |           |            |
|  | High bulk contributions (RI) found.                                               |           |            |
|  | Check that sensorgrams have sufficient curvature.                                 |           |            |
|  | Examine the residual plot. Pay attention to systematic and non-random deviations. |           |            |

**Figure S43.** The SPR sensorgrams, fitting parameters and quality control table of DMA-3q (5 replicates)

- DMA-3r

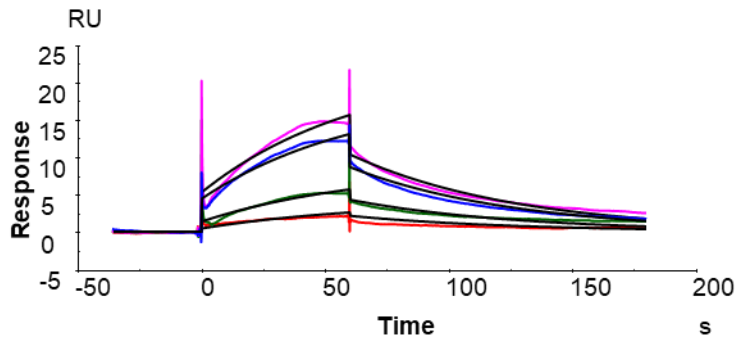

| Curve                                    | ka (1/Ms) | kd (1/s) | KD (M)   | Rmax (RU) | Conc (M) |
|------------------------------------------|-----------|----------|----------|-----------|----------|
|                                          | 53.94     | 0.01487  | 2.756E-4 | 328.9     |          |
| <b>Cycle: 16 3.125 <math>\mu</math>M</b> |           |          |          |           | 3.125E-6 |
| <b>Cycle: 17 6.25 <math>\mu</math>M</b>  |           |          |          |           | 6.250E-6 |
| <b>Cycle: 19 15 <math>\mu</math>M</b>    |           |          |          |           | 1.500E-5 |
| <b>Cycle: 21 12.5 <math>\mu</math>M</b>  |           |          |          |           | 1.250E-5 |

Quality Control Report Residuals Parameters

- ✘ Kinetic constant ka is outside the limits that can be measured by the instrument.
- ✔ Kinetic constants appear to be uniquely determined.
- ! High bulk contributions (RI) found.
- ➔ Check that sensorgrams have sufficient curvature.
- ➔ Examine the residual plot. Pay attention to systematic and non-random deviations.

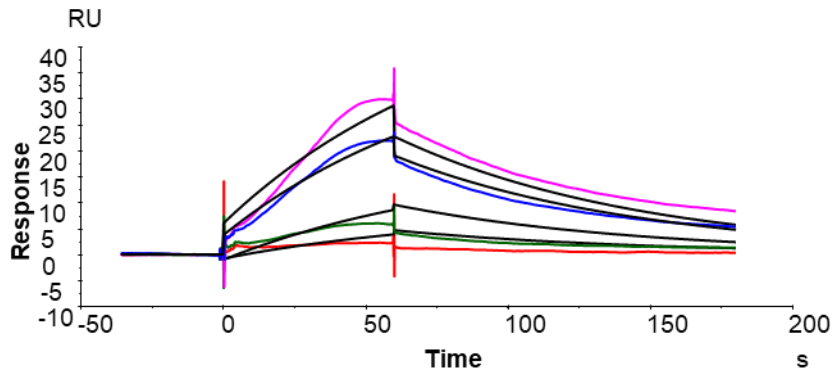

| Curve                                    | ka (1/Ms) | kd (1/s) | KD (M)   | Rmax (RU) | Conc (M) |
|------------------------------------------|-----------|----------|----------|-----------|----------|
|                                          | 12.06     | 0.01149  | 9.528E-4 | 2925      |          |
| <b>Cycle: 16 3.125 <math>\mu</math>M</b> |           |          |          |           | 3.125E-6 |
| <b>Cycle: 17 6.25 <math>\mu</math>M</b>  |           |          |          |           | 6.250E-6 |
| <b>Cycle: 19 15 <math>\mu</math>M</b>    |           |          |          |           | 1.500E-5 |
| <b>Cycle: 21 12.5 <math>\mu</math>M</b>  |           |          |          |           | 1.250E-5 |

| Quality Control | Report                                                                                                             | Residuals | Parameters |
|-----------------|--------------------------------------------------------------------------------------------------------------------|-----------|------------|
|                 | Kinetic constant $k_a$ is outside the limits that can be measured by the instrument.                               |           |            |
|                 | Kinetic constants were difficult to determine.<br>Try to immobilize less ligand or increase analyte concentration. |           |            |
|                 | High bulk contributions (RI) found.                                                                                |           |            |
|                 | Check that sensorgrams have sufficient curvature.                                                                  |           |            |
|                 | Examine the residual plot. Pay attention to systematic and non-random deviations.                                  |           |            |

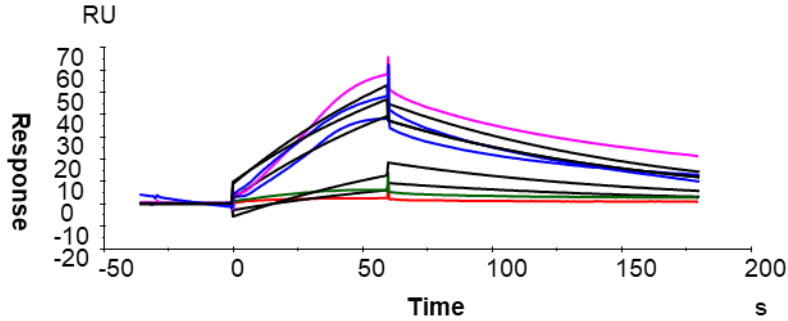

| Curve                                    | $k_a$ (1/Ms) | $k_d$ (1/s) | KD (M)   | Rmax (RU) | Conc (M) |
|------------------------------------------|--------------|-------------|----------|-----------|----------|
|                                          | 14.86        | 0.009526    | 6.412E-4 | 4393      |          |
| <b>Cycle: 16 3.125 <math>\mu</math>M</b> |              |             |          |           | 3.125E-6 |
| <b>Cycle: 17 6.25 <math>\mu</math>M</b>  |              |             |          |           | 6.250E-6 |
| <b>Cycle: 18 12.5 <math>\mu</math>M</b>  |              |             |          |           | 1.250E-5 |
| <b>Cycle: 19 15 <math>\mu</math>M</b>    |              |             |          |           | 1.500E-5 |
| <b>Cycle: 21 12.5 <math>\mu</math>M</b>  |              |             |          |           | 1.250E-5 |

| Quality Control | Report                                                                                                             | Residuals | Parameters |
|-----------------|--------------------------------------------------------------------------------------------------------------------|-----------|------------|
|                 | Kinetic constant $k_a$ is outside the limits that can be measured by the instrument.                               |           |            |
|                 | Kinetic constants were difficult to determine.<br>Try to immobilize less ligand or increase analyte concentration. |           |            |
|                 | High bulk contributions (RI) found.                                                                                |           |            |
|                 | Check that sensorgrams have sufficient curvature.                                                                  |           |            |
|                 | Examine the residual plot. Pay attention to systematic and non-random deviations.                                  |           |            |

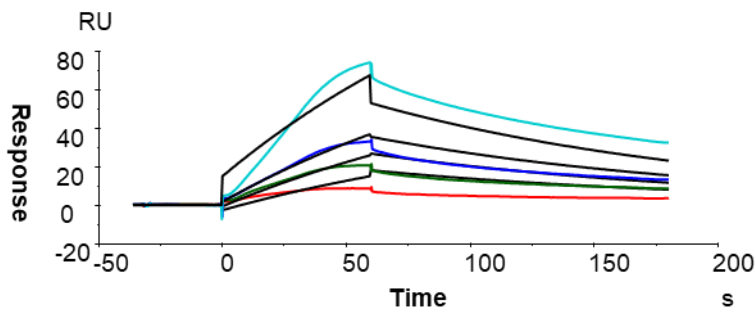

| Curve                 | ka (1/Ms) | kd (1/s) | KD (M)   | Rmax (RU) | Conc (M) |
|-----------------------|-----------|----------|----------|-----------|----------|
|                       | 11.97     | 0.006908 | 5.771E-4 | 6088      |          |
| Cycle: 16 5 $\mu$ M   |           |          |          |           | 5.000E-6 |
| Cycle: 17 7.5 $\mu$ M |           |          |          |           | 7.500E-6 |
| Cycle: 18 10 $\mu$ M  |           |          |          |           | 1.000E-5 |
| Cycle: 20 15 $\mu$ M  |           |          |          |           | 1.500E-5 |

| Quality Control                                                                   | Report                                                                                                             | Residuals | Parameters |
|-----------------------------------------------------------------------------------|--------------------------------------------------------------------------------------------------------------------|-----------|------------|
|  | Kinetic constant ka is outside the limits that can be measured by the instrument.                                  |           |            |
|  | Kinetic constants were difficult to determine.<br>Try to immobilize less ligand or increase analyte concentration. |           |            |
|  | High bulk contributions (RI) found.                                                                                |           |            |
|  | Check that sensorgrams have sufficient curvature.                                                                  |           |            |
|  | Examine the residual plot. Pay attention to systematic and non-random deviations.                                  |           |            |

**Figure S44.** The SPR sensorgrams, fitting parameters and quality control table of DMA-3r (4 replicates)

- Thiazole orange

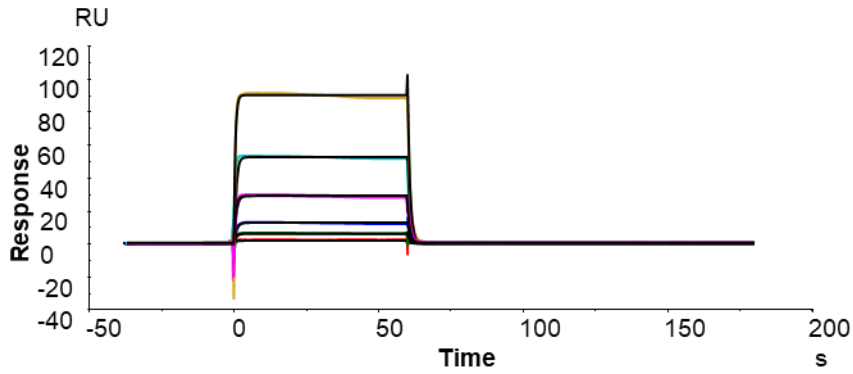

| Curve                 | ka (1/Ms) | kd (1/s) | KD (M)   | Rmax (RU) | Conc (M) |
|-----------------------|-----------|----------|----------|-----------|----------|
|                       | 1.542E+5  | 1.208    | 7.832E-6 | 261.7     |          |
| Cycle: 2 0.05 $\mu$ M |           |          |          |           | 5.000E-8 |
| Cycle: 3 0.2 $\mu$ M  |           |          |          |           | 2.000E-7 |
| Cycle: 4 0.5 $\mu$ M  |           |          |          |           | 5.000E-7 |
| Cycle: 5 1 $\mu$ M    |           |          |          |           | 1.000E-6 |
| Cycle: 6 2.5 $\mu$ M  |           |          |          |           | 2.500E-6 |
| Cycle: 7 5 $\mu$ M    |           |          |          |           | 5.000E-6 |
| Cycle: 8 1 $\mu$ M    |           |          |          |           | 1.000E-6 |

| Quality Control | Report                                                                                | Residuals | Parameters |
|-----------------|---------------------------------------------------------------------------------------|-----------|------------|
| ⚠               | Kinetic constant kd is approaching the limits that can be measured by the instrument. |           |            |
| ✔               | Kinetic constants appear to be uniquely determined.                                   |           |            |
| ⚠               | High bulk contributions (RI) found.                                                   |           |            |
| ⬇               | Check that sensorgrams have sufficient curvature.                                     |           |            |
| ⬇               | Examine the residual plot. Pay attention to systematic and non-random deviations.     |           |            |

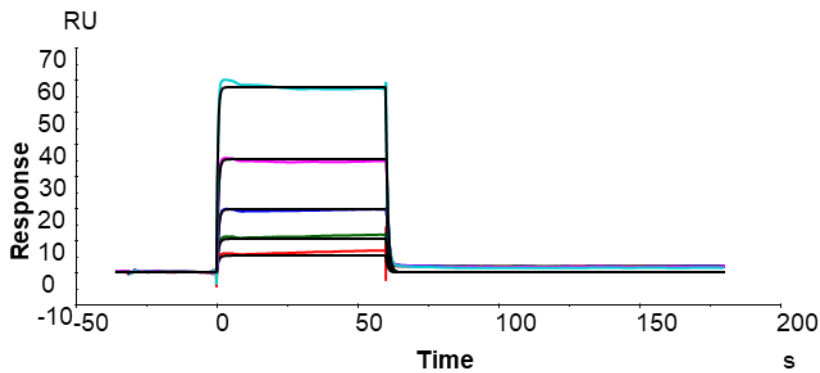

| Curve                  | ka (1/Ms) | kd (1/s) | KD (M)   | Rmax (RU) | Conc (M) |
|------------------------|-----------|----------|----------|-----------|----------|
|                        | 2.046E+5  | 1.450    | 7.088E-6 | 160.1     |          |
| Cycle: 16 0.25 $\mu$ M |           |          |          |           | 2.500E-7 |
| Cycle: 17 0.5 $\mu$ M  |           |          |          |           | 5.000E-7 |
| Cycle: 18 1 $\mu$ M    |           |          |          |           | 1.000E-6 |
| Cycle: 19 2 $\mu$ M    |           |          |          |           | 2.000E-6 |
| Cycle: 20 4 $\mu$ M    |           |          |          |           | 4.000E-6 |

| Quality Control | Report                                                                                | Residuals | Parameters |
|-----------------|---------------------------------------------------------------------------------------|-----------|------------|
| ⚠               | Kinetic constant kd is approaching the limits that can be measured by the instrument. |           |            |
| ✓               | Kinetic constants appear to be uniquely determined.                                   |           |            |
| ➡               | Bulk contributions (RI) were not evaluated. The RI parameter is set to constant.      |           |            |
| ➡               | Check that sensorgrams have sufficient curvature.                                     |           |            |
| ➡               | Examine the residual plot. Pay attention to systematic and non-random deviations.     |           |            |

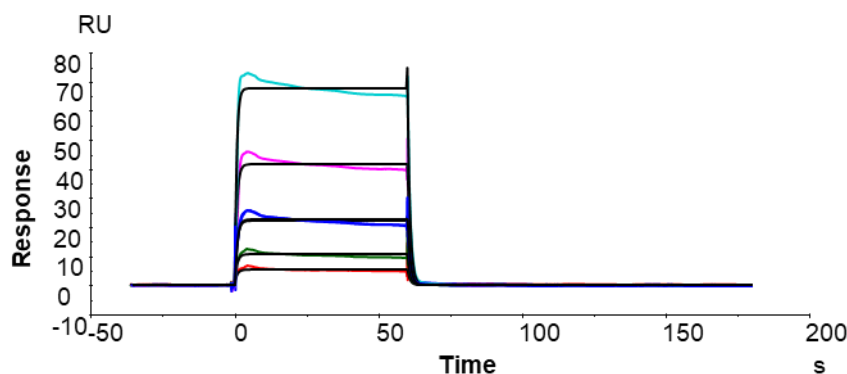

| Curve                 | ka (1/Ms) | kd (1/s) | KD (M)   | Rmax (RU) | Conc (M) |
|-----------------------|-----------|----------|----------|-----------|----------|
|                       | 1.047E+5  | 1.153    | 1.101E-5 | 280.4     |          |
| Cycle: 9 0.25 $\mu$ M |           |          |          |           | 2.500E-7 |
| Cycle: 10 0.5 $\mu$ M |           |          |          |           | 5.000E-7 |
| Cycle: 11 1 $\mu$ M   |           |          |          |           | 1.000E-6 |
| Cycle: 12 2 $\mu$ M   |           |          |          |           | 2.000E-6 |
| Cycle: 13 4 $\mu$ M   |           |          |          |           | 4.000E-6 |
| Cycle: 14 1 $\mu$ M   |           |          |          |           | 1.000E-6 |

| Quality Control | Report                                                                                | Residuals | Parameters |
|-----------------|---------------------------------------------------------------------------------------|-----------|------------|
| ⚠               | Kinetic constant kd is approaching the limits that can be measured by the instrument. |           |            |
| ✓               | Kinetic constants appear to be uniquely determined.                                   |           |            |
| ✓               | No significant bulk contributions (RI) found.                                         |           |            |
| ➡               | Check that sensorgrams have sufficient curvature.                                     |           |            |
| ➡               | Examine the residual plot. Pay attention to systematic and non-random deviations.     |           |            |

**Figure S45.** The SPR sensorgrams, fitting parameters and quality control table of thiazole orange (3 replicates)

- DPF m3

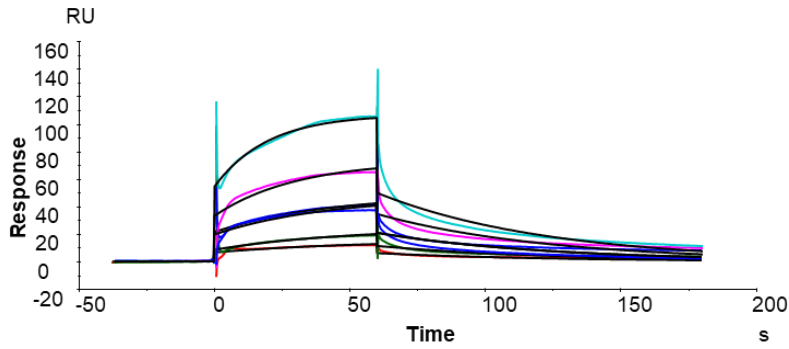

| Curve                   | ka (1/Ms) | kd (1/s) | KD (M)   | Rmax (RU) | Conc (M) |
|-------------------------|-----------|----------|----------|-----------|----------|
|                         | 7141      | 0.01603  | 2.244E-6 | 75.63     |          |
| Cycle: 2 0.3125 $\mu$ M |           |          |          |           | 3.125E-7 |
| Cycle: 3 0.625 $\mu$ M  |           |          |          |           | 6.250E-7 |
| Cycle: 4 1.25 $\mu$ M   |           |          |          |           | 1.250E-6 |
| Cycle: 5 2.5 $\mu$ M    |           |          |          |           | 2.500E-6 |
| Cycle: 6 5 $\mu$ M      |           |          |          |           | 5.000E-6 |
| Cycle: 7 1.25 $\mu$ M   |           |          |          |           | 1.250E-6 |

| Quality Control                     | Report                                                                            | Residuals | Parameters |
|-------------------------------------|-----------------------------------------------------------------------------------|-----------|------------|
| <input checked="" type="checkbox"/> | Kinetic constants are within instrument specifications.                           |           |            |
| <input checked="" type="checkbox"/> | Kinetic constants appear to be uniquely determined.                               |           |            |
| <input type="checkbox"/>            | High bulk contributions (RI) found.                                               |           |            |
| <input type="checkbox"/>            | Check that sensorgrams have sufficient curvature.                                 |           |            |
| <input type="checkbox"/>            | Examine the residual plot. Pay attention to systematic and non-random deviations. |           |            |

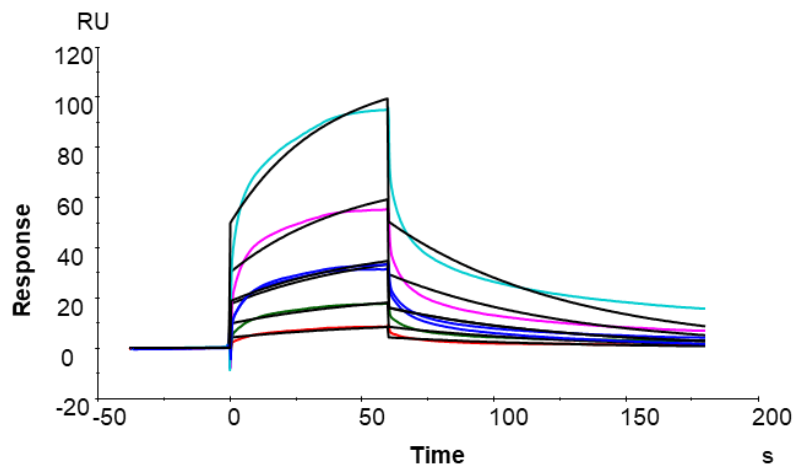



| Curve              | ka (1/Ms) | kd (1/s) | KD (M)   | Rmax (RU) | Conc (M) |
|--------------------|-----------|----------|----------|-----------|----------|
|                    | 2743      | 0.01471  | 5.362E-6 | 128.2     |          |
| Cycle: 2 0.3125 µM |           |          |          |           | 3.125E-7 |
| Cycle: 3 0.625 µM  |           |          |          |           | 6.250E-7 |
| Cycle: 4 1.25 µM   |           |          |          |           | 1.250E-6 |
| Cycle: 5 2.5 µM    |           |          |          |           | 2.500E-6 |
| Cycle: 6 5 µM      |           |          |          |           | 5.000E-6 |
| Cycle: 7 1.25 µM   |           |          |          |           | 1.250E-6 |

| Quality Control | Report                                                                                | Residuals | Parameters |
|-----------------|---------------------------------------------------------------------------------------|-----------|------------|
| ⚠               | Kinetic constant ka is approaching the limits that can be measured by the instrument. |           |            |
| ✓               | Kinetic constants appear to be uniquely determined.                                   |           |            |
| ⚠               | High bulk contributions (RI) found.                                                   |           |            |
| ➔               | Check that sensorgrams have sufficient curvature.                                     |           |            |
| ➔               | Examine the residual plot. Pay attention to systematic and non-random deviations.     |           |            |

**Figure S46.** The SPR sensorgrams, fitting parameters and quality control table of DPF m3 (2 replicates)

- DPF m9

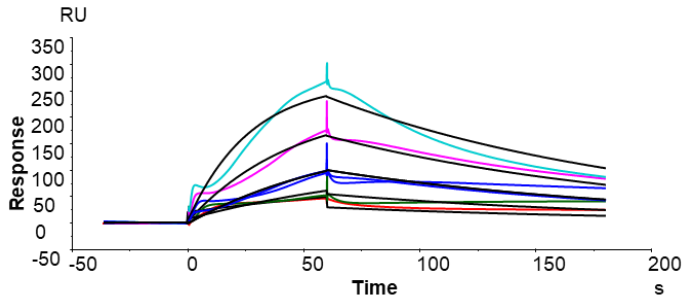

| Curve                   | ka (1/Ms) | kd (1/s) | KD (M)   | Rmax (RU) | Conc (M) |
|-------------------------|-----------|----------|----------|-----------|----------|
|                         | 6492      | 0.007215 | 1.111E-6 | 323.5     |          |
| Cycle: 9 0.3125 $\mu$ M |           |          |          |           | 3.125E-7 |
| Cycle: 10 0.625 $\mu$ M |           |          |          |           | 6.250E-7 |
| Cycle: 11 1.25 $\mu$ M  |           |          |          |           | 1.250E-6 |
| Cycle: 12 2.5 $\mu$ M   |           |          |          |           | 2.500E-6 |
| Cycle: 13 5 $\mu$ M     |           |          |          |           | 5.000E-6 |
| Cycle: 14 1.25 $\mu$ M  |           |          |          |           | 1.250E-6 |

| Quality Control | Report                                                                            | Residuals | Parameters |
|-----------------|-----------------------------------------------------------------------------------|-----------|------------|
| ✓               | Kinetic constants are within instrument specifications.                           |           |            |
| ✓               | Kinetic constants appear to be uniquely determined.                               |           |            |
| ⚠               | High bulk contributions (RI) found.                                               |           |            |
| ➔               | Check that sensorgrams have sufficient curvature.                                 |           |            |
| ➔               | Examine the residual plot. Pay attention to systematic and non-random deviations. |           |            |

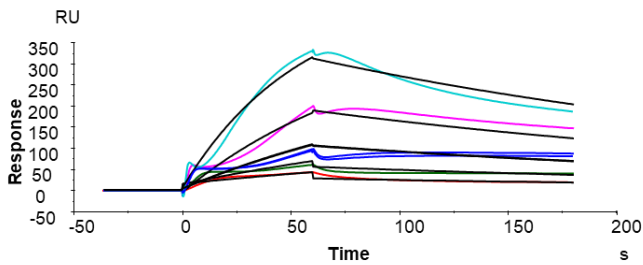

| Curve                   | ka (1/Ms) | kd (1/s) | KD (M)   | Rmax (RU) | Conc (M) |
|-------------------------|-----------|----------|----------|-----------|----------|
|                         | 3007      | 0.003591 | 1.194E-6 | 577.1     |          |
| Cycle: 9 0.3125 $\mu$ M |           |          |          |           | 3.125E-7 |
| Cycle: 10 0.625 $\mu$ M |           |          |          |           | 6.250E-7 |
| Cycle: 11 1.25 $\mu$ M  |           |          |          |           | 1.250E-6 |
| Cycle: 12 2.5 $\mu$ M   |           |          |          |           | 2.500E-6 |
| Cycle: 13 5 $\mu$ M     |           |          |          |           | 5.000E-6 |
| Cycle: 14 1.25 $\mu$ M  |           |          |          |           | 1.250E-6 |

| Quality Control |                                                                                          |            |
|-----------------|------------------------------------------------------------------------------------------|------------|
| Report          | Residuals                                                                                | Parameters |
| !               | Kinetic constant $k_a$ is approaching the limits that can be measured by the instrument. |            |
| ✓               | Kinetic constants appear to be uniquely determined.                                      |            |
| !               | High bulk contributions (R) found.                                                       |            |
| →               | Check that sensorgrams have sufficient curvature.                                        |            |
| →               | Examine the residual plot. Pay attention to systematic and non-random deviations.        |            |

**Figure S47.** The SPR sensorgrams, fitting parameters and quality control table of DPF m9 (2 replicates)

- DPF m10

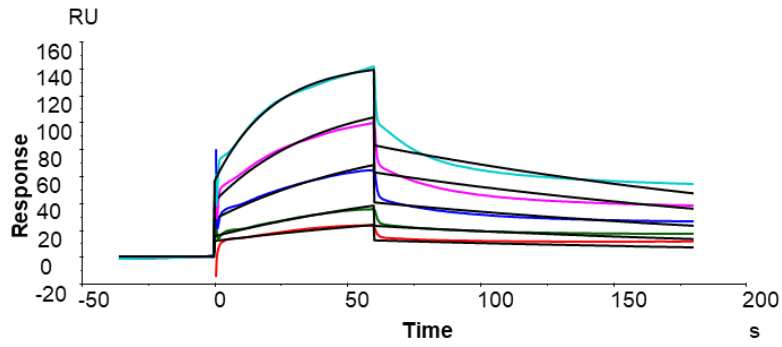

| Curve                    | ka (1/Ms) | kd (1/s) | KD (M)   | Rmax (RU) | Conc (M) |
|--------------------------|-----------|----------|----------|-----------|----------|
|                          | 8288      | 0.004715 | 5.689E-7 | 98.55     |          |
| Cycle: 16 0.3125 $\mu$ M |           |          |          |           | 3.125E-7 |
| Cycle: 17 0.625 $\mu$ M  |           |          |          |           | 6.250E-7 |
| Cycle: 18 1.25 $\mu$ M   |           |          |          |           | 1.250E-6 |
| Cycle: 19 2.5 $\mu$ M    |           |          |          |           | 2.500E-6 |
| Cycle: 20 5 $\mu$ M      |           |          |          |           | 5.000E-6 |

| Quality Control | Report                                                                            | Residuals | Parameters |
|-----------------|-----------------------------------------------------------------------------------|-----------|------------|
| ✓               | Kinetic constants are within instrument specifications.                           |           |            |
| ✓               | Kinetic constants appear to be uniquely determined.                               |           |            |
| ⚠               | High bulk contributions (RI) found.                                               |           |            |
| ➔               | Check that sensorgrams have sufficient curvature.                                 |           |            |
| ➔               | Examine the residual plot. Pay attention to systematic and non-random deviations. |           |            |

Figure S48. The SPR sensorgrams, fitting parameters and quality control table of DPF m10 (1 replicate)

- DPF p6

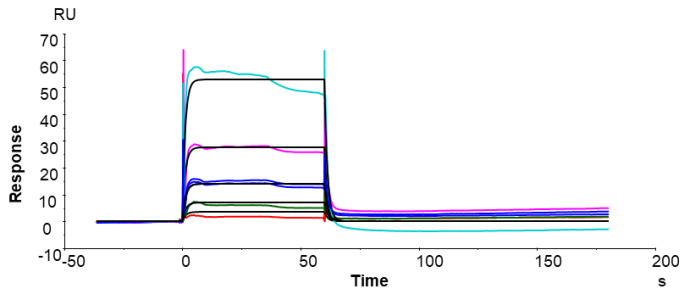

| Curve               | ka (1/Ms) | kd (1/s) | KD (M)   | Rmax (RU) | Conc (M) |
|---------------------|-----------|----------|----------|-----------|----------|
|                     | 1.276E+4  | 0.7802   | 6.114E-5 | 701.3     |          |
| Cycle: 23 0.3125 µM |           |          |          |           | 3.125E-7 |
| Cycle: 24 0.625 µM  |           |          |          |           | 6.250E-7 |
| Cycle: 25 1.25 µM   |           |          |          |           | 1.250E-6 |
| Cycle: 26 2.5 µM    |           |          |          |           | 2.500E-6 |
| Cycle: 27 5 µM      |           |          |          |           | 5.000E-6 |
| Cycle: 28 1.25 µM   |           |          |          |           | 1.250E-6 |

| Quality Control | Report                                                                                | Residuals | Parameters |
|-----------------|---------------------------------------------------------------------------------------|-----------|------------|
| ⚠               | Kinetic constant kd is approaching the limits that can be measured by the instrument. |           |            |
| ⚠               | Kinetic constants were difficult to determine.                                        |           |            |
| ➡               | Bulk contributions (RI) were not evaluated. The RI parameter is set to constant.      |           |            |
| ➡               | Check that sensorgrams have sufficient curvature.                                     |           |            |
| ➡               | Examine the residual plot. Pay attention to systematic and non-random deviations.     |           |            |

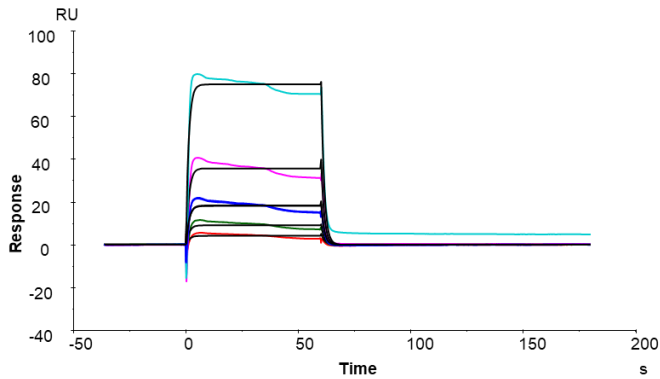

| Curve               | ka (1/Ms) | kd (1/s) | KD (M)   | Rmax (RU) | Conc (M) |
|---------------------|-----------|----------|----------|-----------|----------|
|                     | 1.442E+4  | 0.7729   | 5.362E-5 | 1103      |          |
| Cycle: 23 0.3125 µM |           |          |          |           | 3.125E-7 |
| Cycle: 24 0.625 µM  |           |          |          |           | 6.250E-7 |
| Cycle: 25 1.25 µM   |           |          |          |           | 1.250E-6 |
| Cycle: 26 2.5 µM    |           |          |          |           | 2.500E-6 |
| Cycle: 27 5 µM      |           |          |          |           | 5.000E-6 |
| Cycle: 28 1.25 µM   |           |          |          |           | 1.250E-6 |

| Quality Control | Report                                                                                                             | Residuals | Parameters |
|-----------------|--------------------------------------------------------------------------------------------------------------------|-----------|------------|
| !               | Kinetic constant $k_d$ is approaching the limits that can be measured by the instrument.                           |           |            |
| !               | Kinetic constants were difficult to determine.<br>Try to immobilize less ligand or increase analyte concentration. |           |            |
| !               | High bulk contributions (RI) found.                                                                                |           |            |
| →               | Check that sensorgrams have sufficient curvature.                                                                  |           |            |
| →               | Examine the residual plot. Pay attention to systematic and non-random deviations.                                  |           |            |

**Figure S49.** The SPR sensorgrams, fitting parameters and quality control table of DPF p6 (2 replicates)

- DPF p15

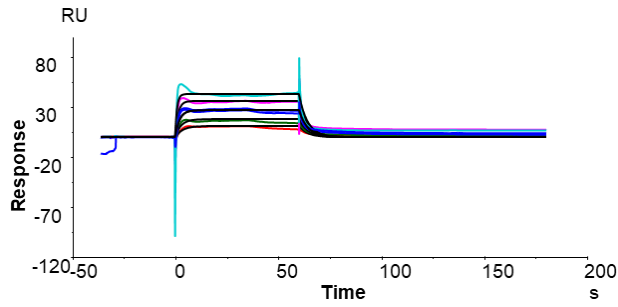

| Curve               | ka (1/Ms) | kd (1/s) | KD (M)   | Rmax (RU) | Conc (M) |
|---------------------|-----------|----------|----------|-----------|----------|
|                     | 1.850E+5  | 0.2387   | 1.291E-6 | 53.53     |          |
| Cycle: 30 0.3125 µM |           |          |          |           | 3.125E-7 |
| Cycle: 31 0.625 µM  |           |          |          |           | 6.250E-7 |
| Cycle: 32 1.25 µM   |           |          |          |           | 1.250E-6 |
| Cycle: 33 2.5 µM    |           |          |          |           | 2.500E-6 |
| Cycle: 34 5 µM      |           |          |          |           | 5.000E-6 |
| Cycle: 35 1.25 µM   |           |          |          |           | 1.250E-6 |

| Quality Control | Report                                                                            | Residuals | Parameters |
|-----------------|-----------------------------------------------------------------------------------|-----------|------------|
| ✓               | Kinetic constants are within instrument specifications.                           |           |            |
| ⚠               | Kinetic constants were difficult to determine.                                    |           |            |
| ➔               | Bulk contributions (RI) were not evaluated. The RI parameter is set to constant.  |           |            |
| ➔               | Check that sensorgrams have sufficient curvature.                                 |           |            |
| ➔               | Examine the residual plot. Pay attention to systematic and non-random deviations. |           |            |

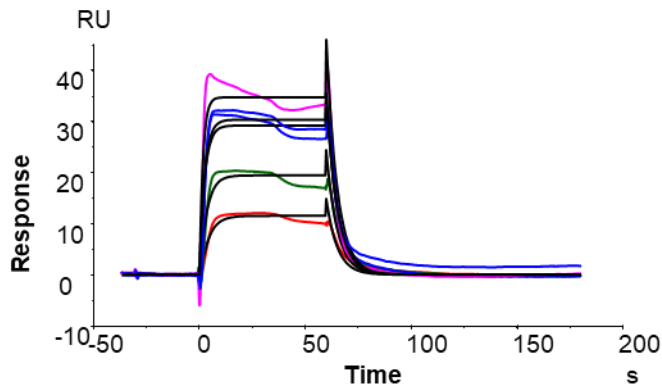

| Curve              | ka (1/Ms) | kd (1/s) | KD (M)   | Rmax (RU) | Conc (M) |
|--------------------|-----------|----------|----------|-----------|----------|
|                    | 1.832E+5  | 0.1956   | 1.068E-6 | 65.58     |          |
| Cycle: 9 0.3125 µM |           |          |          |           | 3.125E-7 |
| Cycle: 10 0.625 µM |           |          |          |           | 6.250E-7 |
| Cycle: 11 1.25 µM  |           |          |          |           | 1.250E-6 |
| Cycle: 12 2.5 µM   |           |          |          |           | 2.500E-6 |
| Cycle: 14 1.25 µM  |           |          |          |           | 1.250E-6 |

| Quality Control                     | Report                                                                            | Residuals | Parameters |
|-------------------------------------|-----------------------------------------------------------------------------------|-----------|------------|
| <input checked="" type="checkbox"/> | Kinetic constants are within instrument specifications.                           |           |            |
| <input checked="" type="checkbox"/> | Kinetic constants appear to be uniquely determined.                               |           |            |
| <input checked="" type="checkbox"/> | High bulk contributions (RI) found.                                               |           |            |
| <input type="checkbox"/>            | Check that sensorgrams have sufficient curvature.                                 |           |            |
| <input type="checkbox"/>            | Examine the residual plot. Pay attention to systematic and non-random deviations. |           |            |

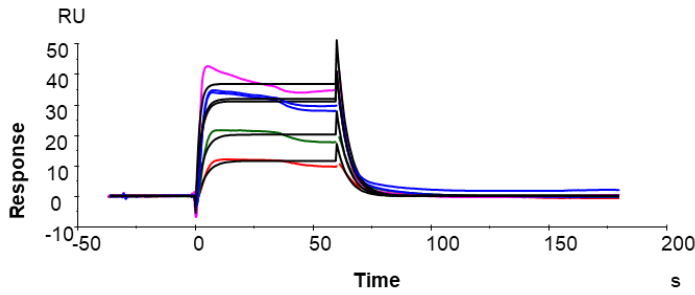

| Curve                      | ka (1/Ms) | kd (1/s) | KD (M)   | Rmax (RU) | Conc (M) |
|----------------------------|-----------|----------|----------|-----------|----------|
|                            | 1.971E+5  | 0.2122   | 1.077E-6 | 75.76     |          |
| <b>Cycle: 37 0.3125 µM</b> |           |          |          |           | 3.125E-7 |
| <b>Cycle: 38 0.625 µM</b>  |           |          |          |           | 6.250E-7 |
| <b>Cycle: 39 1.25 µM</b>   |           |          |          |           | 1.250E-6 |
| <b>Cycle: 40 2.5 µM</b>    |           |          |          |           | 2.500E-6 |
| <b>Cycle: 42 1.25 µM</b>   |           |          |          |           | 1.250E-6 |

| Quality Control                     | Report                                                                            | Residuals | Parameters |
|-------------------------------------|-----------------------------------------------------------------------------------|-----------|------------|
| <input checked="" type="checkbox"/> | Kinetic constants are within instrument specifications.                           |           |            |
| <input checked="" type="checkbox"/> | Kinetic constants appear to be uniquely determined.                               |           |            |
| <input checked="" type="checkbox"/> | High bulk contributions (RI) found.                                               |           |            |
| <input type="checkbox"/>            | Check that sensorgrams have sufficient curvature.                                 |           |            |
| <input type="checkbox"/>            | Examine the residual plot. Pay attention to systematic and non-random deviations. |           |            |

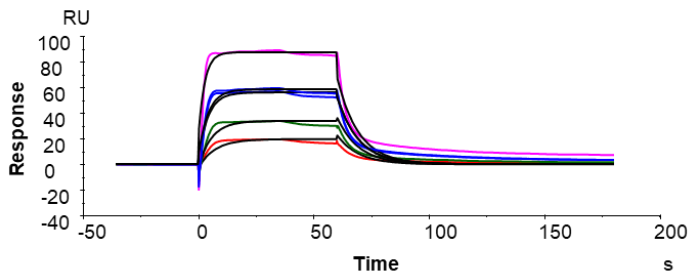



| Curve                      | ka (1/Ms) | kd (1/s) | KD (M)   | Rmax (RU) | Conc (M) |
|----------------------------|-----------|----------|----------|-----------|----------|
|                            | 1.074E+5  | 0.1080   | 1.006E-6 | 97,84     |          |
| <b>Cycle: 30 0.3125 µM</b> |           |          |          |           | 3.125E-7 |
| <b>Cycle: 31 0.625 µM</b>  |           |          |          |           | 6.250E-7 |
| <b>Cycle: 32 1.25 µM</b>   |           |          |          |           | 1.250E-6 |
| <b>Cycle: 33 2.5 µM</b>    |           |          |          |           | 2.500E-6 |
| <b>Cycle: 35 1.25 µM</b>   |           |          |          |           | 1.250E-6 |

| Quality Control                                                                   | Report                                                                            | Residuals | Parameters |
|-----------------------------------------------------------------------------------|-----------------------------------------------------------------------------------|-----------|------------|
|  | Kinetic constants are within instrument specifications.                           |           |            |
|  | Kinetic constants appear to be uniquely determined.                               |           |            |
|  | High bulk contributions (RI) found.                                               |           |            |
|  | Check that sensorgrams have sufficient curvature.                                 |           |            |
|  | Examine the residual plot. Pay attention to systematic and non-random deviations. |           |            |

**Figure S50.** The SPR sensorgrams, fitting parameters and quality control table of DPF p15 (4 replicates)

- Acridine orange

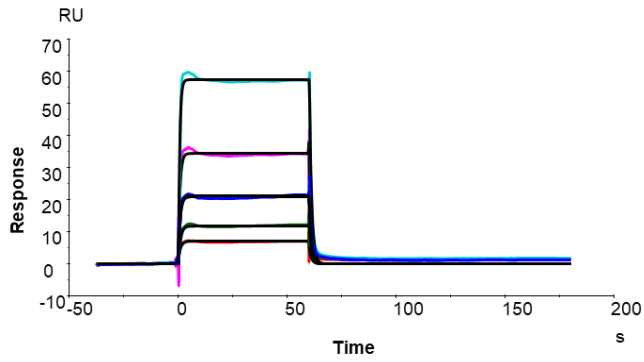

| Curve                 | ka (1/Ms) | kd (1/s) | KD (M)   | Rmax (RU) | Conc (M) |
|-----------------------|-----------|----------|----------|-----------|----------|
|                       | 1.730E+5  | 0.9745   | 5.632E-6 | 144.6     |          |
| Cycle: 2 0.25 $\mu$ M |           |          |          |           | 2.500E-7 |
| Cycle: 3 0.5 $\mu$ M  |           |          |          |           | 5.000E-7 |
| Cycle: 4 1 $\mu$ M    |           |          |          |           | 1.000E-6 |
| Cycle: 5 2 $\mu$ M    |           |          |          |           | 2.000E-6 |
| Cycle: 6 4 $\mu$ M    |           |          |          |           | 4.000E-6 |
| Cycle: 7 1 $\mu$ M    |           |          |          |           | 1.000E-6 |

| Quality Control | Report                                                                                | Residuals | Parameters |
|-----------------|---------------------------------------------------------------------------------------|-----------|------------|
| ⚠               | Kinetic constant kd is approaching the limits that can be measured by the instrument. |           |            |
| ✓               | Kinetic constants appear to be uniquely determined.                                   |           |            |
| ✓               | No significant bulk contributions (RI) found.                                         |           |            |
| ➡               | Check that sensorgrams have sufficient curvature.                                     |           |            |
| ➡               | Examine the residual plot. Pay attention to systematic and non-random deviations.     |           |            |

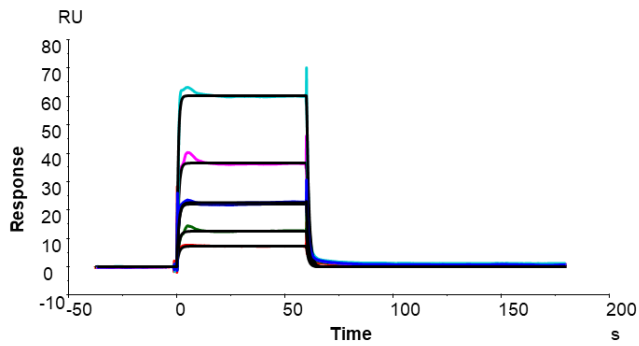

| Curve                 | ka (1/Ms) | kd (1/s) | KD (M)   | Rmax (RU) | Conc (M) |
|-----------------------|-----------|----------|----------|-----------|----------|
|                       | 1.722E+5  | 0.9827   | 5.709E-6 | 154.9     |          |
| Cycle: 2 0.25 $\mu$ M |           |          |          |           | 2.500E-7 |
| Cycle: 3 0.5 $\mu$ M  |           |          |          |           | 5.000E-7 |
| Cycle: 4 1 $\mu$ M    |           |          |          |           | 1.000E-6 |
| Cycle: 5 2 $\mu$ M    |           |          |          |           | 2.000E-6 |
| Cycle: 6 4 $\mu$ M    |           |          |          |           | 4.000E-6 |
| Cycle: 7 1 $\mu$ M    |           |          |          |           | 1.000E-6 |

| Quality Control                                                                   | Report                                                                                | Residuals | Parameters |
|-----------------------------------------------------------------------------------|---------------------------------------------------------------------------------------|-----------|------------|
|  | Kinetic constant kd is approaching the limits that can be measured by the instrument. |           |            |
|  | Kinetic constants appear to be uniquely determined.                                   |           |            |
|  | No significant bulk contributions (RI) found.                                         |           |            |
|  | Check that sensorgrams have sufficient curvature.                                     |           |            |
|  | Examine the residual plot. Pay attention to systematic and non-random deviations.     |           |            |

**Figure S51.** The SPR sensorgrams, fitting parameters and quality control table of acridine orange (2 replicates)

• DPF m2

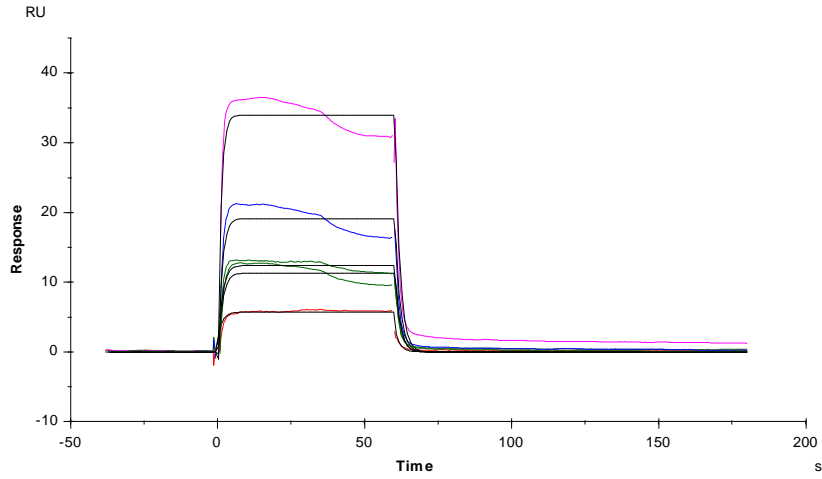

| Quality Control | Report                                                                                   | Residuals | Parameters |
|-----------------|------------------------------------------------------------------------------------------|-----------|------------|
| ⚠               | Kinetic constant $k_d$ is approaching the limits that can be measured by the instrument. |           |            |
| ✅               | Kinetic constants appear to be uniquely determined.                                      |           |            |
| ⚠               | High bulk contributions (RI) found.                                                      |           |            |
| ➡               | Check that sensorgrams have sufficient curvature.                                        |           |            |
| ➡               | Examine the residual plot. Pay attention to systematic and non-random deviations.        |           |            |

| 1:1 Binding            | $k_a$ (1/Ms) | $k_d$ (1/s) | KD (M)   | Rmax (RU) | Conc (M) | $t_c$    | Flow (ul/min) | kt (RU/Ms) | RI (RU) | Chi <sup>2</sup> (RU <sup>2</sup> ) | U-value |
|------------------------|--------------|-------------|----------|-----------|----------|----------|---------------|------------|---------|-------------------------------------|---------|
| Curve                  | 1.63E+05     | 0.6213      | 3.80E-06 | 120.6     |          | 4.70E+12 |               |            |         | 0.862                               | 7       |
| Cycle: 5 0.125 $\mu$ M |              |             |          |           | 1.25E-07 |          | 50            | 1.73E+13   | 1.85    |                                     |         |
| Cycle: 7 0.5 $\mu$ M   |              |             |          |           | 5.00E-07 |          | 50            | 1.73E+13   | -2.734  |                                     |         |
| Cycle: 8 1 $\mu$ M     |              |             |          |           | 1.00E-06 |          | 50            | 1.73E+13   | -6.023  |                                     |         |
| Cycle: 9 2 $\mu$ M     |              |             |          |           | 2.00E-06 |          | 50            | 1.73E+13   | -7.642  |                                     |         |
| Cycle: 10 0.5 $\mu$ M  |              |             |          |           | 5.00E-07 |          | 50            | 1.73E+13   | -1.641  |                                     |         |

Figure S52. The SPR sensorgrams, fitting parameters and quality control table of DPF m2 (1 replicate)

- DPF p2

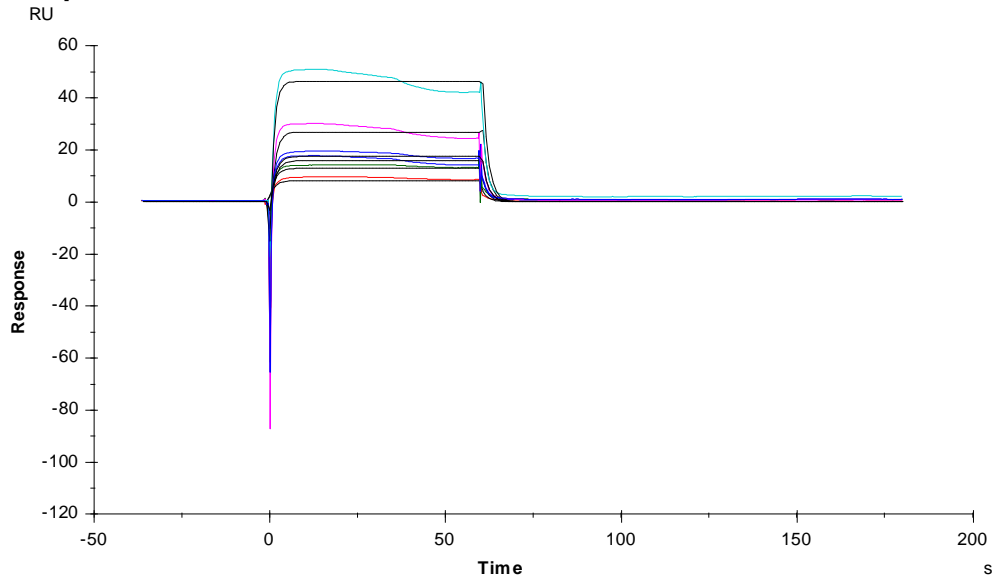

| Quality Control                                                                         |           |          |          |           |          |          |               |            |         |            |         |
|-----------------------------------------------------------------------------------------|-----------|----------|----------|-----------|----------|----------|---------------|------------|---------|------------|---------|
| Report                                                                                  |           |          |          |           |          |          |               |            |         |            |         |
| Residuals                                                                               |           |          |          |           |          |          |               |            |         |            |         |
| Parameters                                                                              |           |          |          |           |          |          |               |            |         |            |         |
| ! Kinetic constant kd is approaching the limits that can be measured by the instrument. |           |          |          |           |          |          |               |            |         |            |         |
| ! Kinetic constants were difficult to determine.                                        |           |          |          |           |          |          |               |            |         |            |         |
| ! High bulk contributions (RI) found.                                                   |           |          |          |           |          |          |               |            |         |            |         |
| → Check that sensorgrams have sufficient curvature.                                     |           |          |          |           |          |          |               |            |         |            |         |
| → Examine the residual plot. Pay attention to systematic and non-random deviations.     |           |          |          |           |          |          |               |            |         |            |         |
| 1:1 Binding                                                                             |           |          |          |           |          |          |               |            |         |            |         |
| Curve                                                                                   | ka (1/Ms) | kd (1/s) | KD (M)   | Rmax (RU) | Conc (M) | tc       | Flow (ul/min) | kt (RU/Ms) | RI (RU) | Chi² (RU²) | U-value |
|                                                                                         | 1.65E+05  | 0.6309   | 3.83E-06 | 178.6     |          | 2.31E+11 |               |            |         | 9.66       | 20      |
| Cycle: 12 0.125 µM                                                                      |           |          |          |           | 1.25E-07 |          | 50            | 8.50E+11   | 2.435   |            |         |
| Cycle: 13 0.25 µM                                                                       |           |          |          |           | 2.50E-07 |          | 50            | 8.50E+11   | 1.848   |            |         |
| Cycle: 14 0.5 µM                                                                        |           |          |          |           | 5.00E-07 |          | 50            | 8.50E+11   | -4.89   |            |         |
| Cycle: 15 1 µM                                                                          |           |          |          |           | 1.00E-06 |          | 50            | 8.50E+11   | -10.26  |            |         |
| Cycle: 16 2 µM                                                                          |           |          |          |           | 2.00E-06 |          | 50            | 8.50E+11   | -15.13  |            |         |
| Cycle: 17 0.5 µM                                                                        |           |          |          |           | 5.00E-07 |          | 50            | 8.50E+11   | -3.255  |            |         |

Figure S53. The SPR sensorgrams, fitting parameters and quality control table of DPF p2 (1 replicate)

- DPF p5

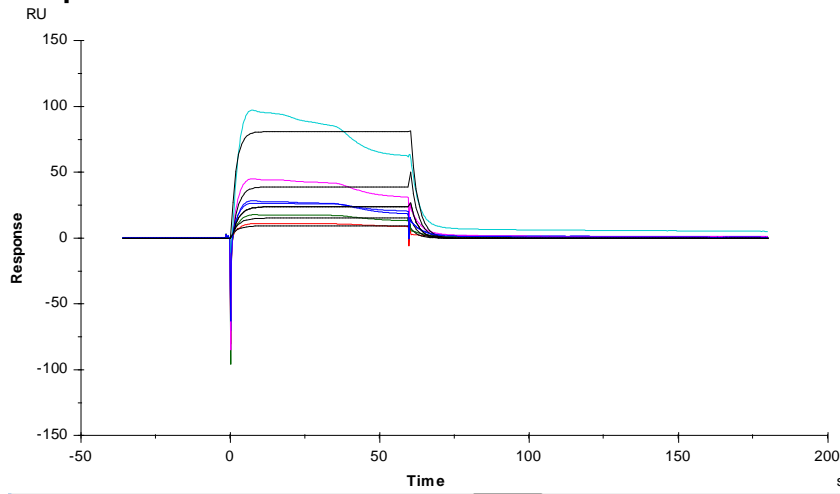

| Quality Control |                                                                                          | Report | Residuals | Parameters |
|-----------------|------------------------------------------------------------------------------------------|--------|-----------|------------|
| ⚠               | Kinetic constant $k_d$ is approaching the limits that can be measured by the instrument. |        |           |            |
| ✅               | Kinetic constants appear to be uniquely determined.                                      |        |           |            |
| ⚠               | High bulk contributions (RI) found.                                                      |        |           |            |
| ➡               | Check that sensorgrams have sufficient curvature.                                        |        |           |            |
| ➡               | Examine the residual plot. Pay attention to systematic and non-random deviations.        |        |           |            |

| 1:1 Binding             | $k_a$ (1/Ms) | $k_d$ (1/s) | KD (M)   | Rmax (RU) | Conc (M) | $t_c$    | Flow (ul/min) | kt (RU/Ms) | RI (RU) | Chi <sup>2</sup> (RU <sup>2</sup> ) | U-value |
|-------------------------|--------------|-------------|----------|-----------|----------|----------|---------------|------------|---------|-------------------------------------|---------|
| Curve                   | 9.55E+04     | 0.4119      | 4.32E-06 | 299.5     |          | 1.70E+15 |               |            |         | 20.8                                | 12      |
| Cycle: 19 0.125 $\mu$ M |              |             |          |           | 1.25E-07 |          | 50            | 6.28E+15   | 0.9526  |                                     |         |
| Cycle: 20 0.25 $\mu$ M  |              |             |          |           | 2.50E-07 |          | 50            | 6.28E+15   | -1.114  |                                     |         |
| Cycle: 21 0.5 $\mu$ M   |              |             |          |           | 5.00E-07 |          | 50            | 6.28E+15   | -7.203  |                                     |         |
| Cycle: 22 1 $\mu$ M     |              |             |          |           | 1.00E-06 |          | 50            | 6.28E+15   | -17.29  |                                     |         |
| Cycle: 23 2 $\mu$ M     |              |             |          |           | 2.00E-06 |          | 50            | 6.28E+15   | -13.9   |                                     |         |
| Cycle: 24 0.5 $\mu$ M   |              |             |          |           | 5.00E-07 |          | 50            | 6.28E+15   | -7.218  |                                     |         |

Figure S54. The SPR sensorgrams, fitting parameters and quality control table of DPF p5 (1 replicate)

- DPF p8

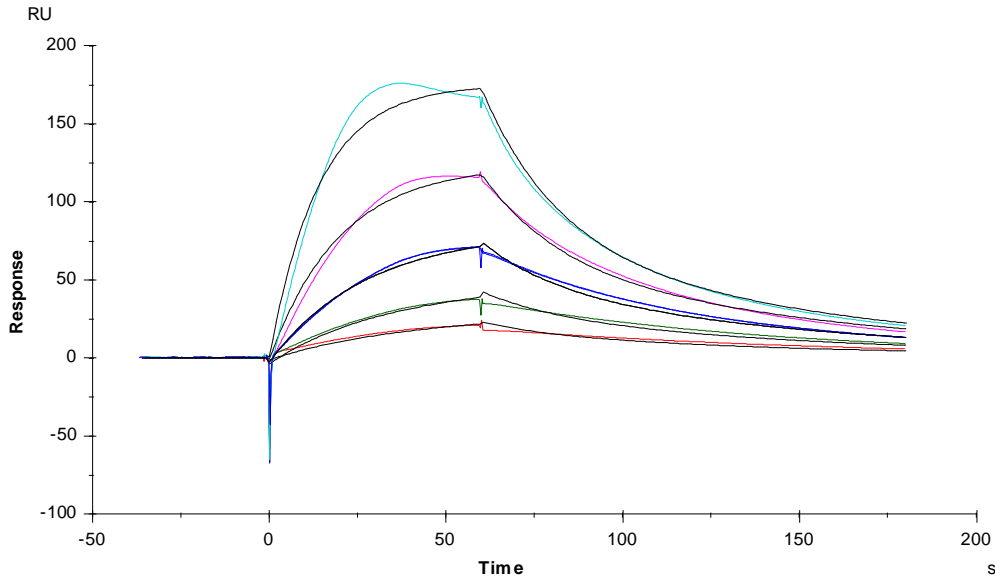

(Heterogeneous Ligand binding mode)

- Poor 1:1 fit (high Chi<sup>2</sup>)
- Kinetics at limit of detection
- High U-value
- Fast on and off rate constants from Heterogeneous Ligand probably more representative
- Binding parameters were the average of the two binding processes

| Heterogeneous Ligand Curve | ka1 (1/Ms) | kd1 (1/s) | KD1 (M)  | ka2 (1/Ms) | kd2 (1/s) | KD2 (M)  | Rmax1 (RU) | Rmax2 (RU) | Conc (M) | tc       | Flow (ul/min) | kt (RU/Ms) | RI (RU)  | Chi <sup>2</sup> (RU <sup>2</sup> ) | U-value  |
|----------------------------|------------|-----------|----------|------------|-----------|----------|------------|------------|----------|----------|---------------|------------|----------|-------------------------------------|----------|
|                            | 1.80E+05   | 0.01035   | 5.75E-08 | 4.04E+04   | 0.04786   | 1.18E-06 | 87.71      | 387.3      |          | 1.61E+09 |               |            |          |                                     | 15.4 N/A |
| Cycle: 26 0.025 μM         |            |           |          |            |           |          |            |            | 2.50E-08 |          |               | 50         | 5.93E+09 | -1.277                              |          |
| Cycle: 27 0.05 μM          |            |           |          |            |           |          |            |            | 5.00E-08 |          |               | 50         | 5.93E+09 | -3.837                              |          |
| Cycle: 28 0.1 μM           |            |           |          |            |           |          |            |            | 1.00E-07 |          |               | 50         | 5.93E+09 | -2.784                              |          |
| Cycle: 29 0.2 μM           |            |           |          |            |           |          |            |            | 2.00E-07 |          |               | 50         | 5.93E+09 | -0.432                              |          |
| Cycle: 30 0.4 μM           |            |           |          |            |           |          |            |            | 4.00E-07 |          |               | 50         | 5.93E+09 | 0.8599                              |          |
| Cycle: 31 0.1 μM           |            |           |          |            |           |          |            |            | 1.00E-07 |          |               | 50         | 5.93E+09 | -2.601                              |          |

Figure S55. The SPR sensorgrams, fitting parameters and quality control table of DPF p8 (1 replicate)

- **DPF p13**

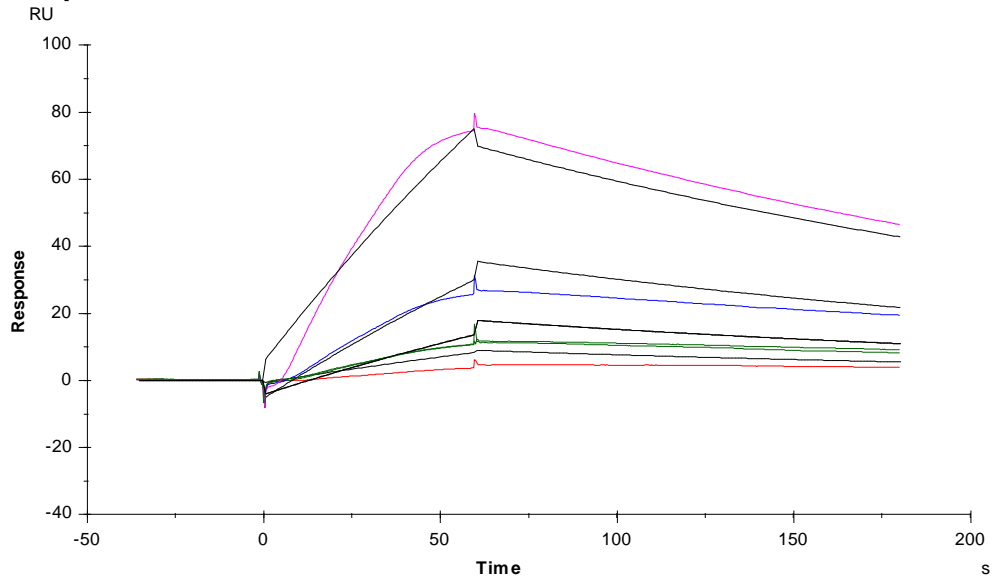

**(Heterogeneous Ligand binding mode)**

- Removed 0.0125  $\mu\text{M}$  curve from analysis due to noise
- Poor 1:1 fit (high  $\text{Chi}^2$ )
- Heterogeneous Ligand probably more representative
- Binding parameters were the average of the two binding processes

| Heterogeneous Ligand          | ka1 (1/Ms) | kd1 (1/s) | KD1 (M)  | ka2 (1/Ms) | kd2 (1/s) | KD2 (M)  | Rmax1 (RU) | Rmax2 (RU) | Conc (M) | tc       | Flow (ul/min) | kt (RU/Ms) | Ri (RU) | Chi <sup>2</sup> (RU <sup>2</sup> ) | U-value  |
|-------------------------------|------------|-----------|----------|------------|-----------|----------|------------|------------|----------|----------|---------------|------------|---------|-------------------------------------|----------|
| Curve                         | 5623       | 0.004204  | 7.48E-07 | 6920       | 0.004216  | 6.09E-07 | 559.2      | 557.9      |          | 6.35E+07 |               |            |         |                                     | 14.5 N/A |
| Cycle: 34 0.025 $\mu\text{M}$ |            |           |          |            |           |          |            |            | 2.50E-08 |          | 50            | 2.34E+08   | -0.6447 |                                     |          |
| Cycle: 35 0.05 $\mu\text{M}$  |            |           |          |            |           |          |            |            | 5.00E-08 |          | 50            | 2.34E+08   | -4.26   |                                     |          |
| Cycle: 36 0.1 $\mu\text{M}$   |            |           |          |            |           |          |            |            | 1.00E-07 |          | 50            | 2.34E+08   | -5.36   |                                     |          |
| Cycle: 37 0.2 $\mu\text{M}$   |            |           |          |            |           |          |            |            | 2.00E-07 |          | 50            | 2.34E+08   | 5.596   |                                     |          |
| Cycle: 38 0.05 $\mu\text{M}$  |            |           |          |            |           |          |            |            | 5.00E-08 |          | 50            | 2.34E+08   | -4.18   |                                     |          |

**Figure S56.** The SPR sensorgrams, fitting parameters and quality control table of DPF p13 (1 replicate)



- DMZ m3

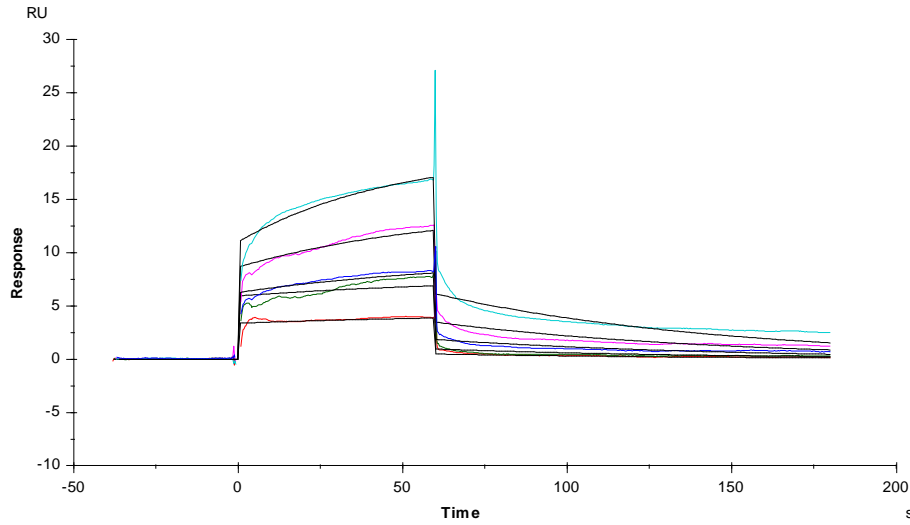

| Quality Control | Report                                                                                                               | Residuals | Parameters |
|-----------------|----------------------------------------------------------------------------------------------------------------------|-----------|------------|
| ✓               | Kinetic constants are within instrument specifications.                                                              |           |            |
| ✗               | Kinetic constants cannot be uniquely determined.<br>Try to immobilize less ligand or increase analyte concentration. |           |            |
| !               | High bulk contributions (RI) found.                                                                                  |           |            |
| →               | Check that sensorgrams have sufficient curvature.                                                                    |           |            |
| →               | Examine the residual plot. Pay attention to systematic and non-random deviations.                                    |           |            |

| 1:1 Binding       | ka (1/Ms) | kd (1/s) | KD (M)   | Rmax (RU) | Conc (M) | tc       | Flow (ul/min) | kt (RU/Ms) | RI (RU)  | Chi <sup>2</sup> (RU <sup>2</sup> ) | U-value |
|-------------------|-----------|----------|----------|-----------|----------|----------|---------------|------------|----------|-------------------------------------|---------|
| Curve             | 5.24E+03  | 0.01152  | 2.20E-06 | 1.76E+01  |          | 3.19E+08 |               |            |          | 0.262                               | 26      |
| Cycle: 5 0.125 µM |           |          |          |           | 1.25E-07 |          | 50            | 1.17E+09   | 3.379    |                                     |         |
| Cycle: 6 0.25 µM  |           |          |          |           | 2.50E-07 |          | 50            | 1.17E+09   | 5.937    |                                     |         |
| Cycle: 8 1 µM     |           |          |          |           | 1.00E-06 |          | 50            | 1.17E+09   | 8.635    |                                     |         |
| Cycle: 9 2 µM     |           |          |          |           | 2.00E-06 |          | 50            | 1.17E+09   | 1.10E+01 |                                     |         |
| Cycle: 10 0.5 µM  |           |          |          |           | 5.00E-07 |          | 50            | 1.17E+09   | 6.26E+00 |                                     |         |

Figure S57. The SPR sensorgrams, fitting parameters and quality control table of DMZ m3 (1 replicate)

- DMZ p8

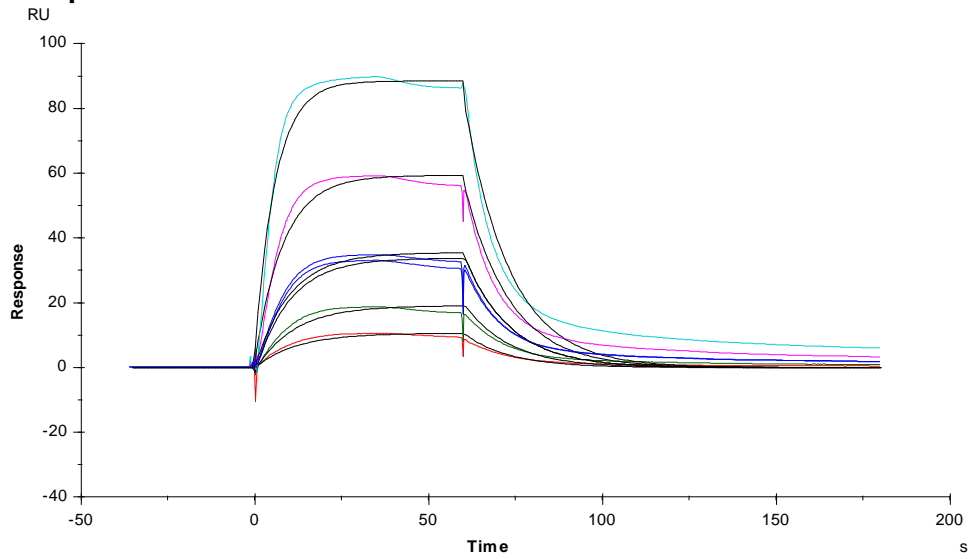

| Quality Control                     | Report                                                                            | Residuals | Parameters |
|-------------------------------------|-----------------------------------------------------------------------------------|-----------|------------|
| <input checked="" type="checkbox"/> | Kinetic constants are within instrument specifications.                           |           |            |
| <input checked="" type="checkbox"/> | Kinetic constants appear to be uniquely determined.                               |           |            |
| <input checked="" type="checkbox"/> | No significant bulk contributions (RI) found.                                     |           |            |
| <input type="checkbox"/>            | Check that sensorgrams have sufficient curvature.                                 |           |            |
| <input type="checkbox"/>            | Examine the residual plot. Pay attention to systematic and non-random deviations. |           |            |

| 1:1 Binding         | ka (1/Ms) | kd (1/s) | KD (M)   | Rmax (RU) | Conc (M) | tc       | Flow (ul/min) | kt (RU/Ms) | RI (RU)  | Chi <sup>2</sup> (RU <sup>2</sup> ) | U-value |
|---------------------|-----------|----------|----------|-----------|----------|----------|---------------|------------|----------|-------------------------------------|---------|
| Curve               | 9.31E+04  | 0.07675  | 8.25E-07 | 1.51E+02  |          | 1.55E+15 |               |            |          | 7.85                                | 3       |
| Cycle: 19 0.0625 µM |           |          |          |           | 6.25E-08 |          | 50            | 5.71E+15   | -0.00937 |                                     |         |
| Cycle: 20 0.125 µM  |           |          |          |           | 1.25E-07 |          | 50            | 5.71E+15   | -0.7882  |                                     |         |
| Cycle: 21 0.25 µM   |           |          |          |           | 2.50E-07 |          | 50            | 5.71E+15   | -1.375   |                                     |         |
| Cycle: 22 0.5 µM    |           |          |          |           | 5.00E-07 |          | 50            | 5.71E+15   | 2.25E+00 |                                     |         |
| Cycle: 23 1 µM      |           |          |          |           | 1.00E-06 |          | 50            | 5.71E+15   | 5.57E+00 |                                     |         |
| Cycle: 24 0.25 µM   |           |          |          |           | 2.50E-07 |          | 50            | 5.71E+15   | 3.26E-01 |                                     |         |

Figure S58. The SPR sensorgrams, fitting parameters and quality control table of DMZ p8 (1 replicate)

• **DMZ p13**

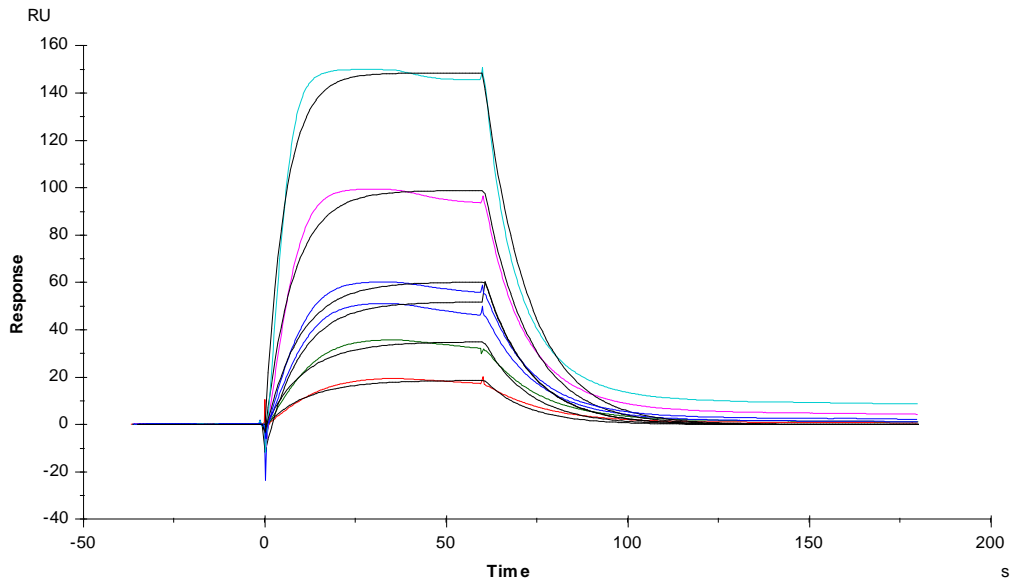

| Quality Control | Report                                                                            | Residuals | Parameters |
|-----------------|-----------------------------------------------------------------------------------|-----------|------------|
| ✓               | Kinetic constants are within instrument specifications.                           |           |            |
| ✓               | Kinetic constants appear to be uniquely determined.                               |           |            |
| !               | High bulk contributions (RI) found.                                               |           |            |
| ↻               | Check that sensorgrams have sufficient curvature.                                 |           |            |
| ↻               | Examine the residual plot. Pay attention to systematic and non-random deviations. |           |            |

| 1:1 Binding         | ka (1/Ms) | kd (1/s) | KD (M)   | Rmax (RU) | Conc (M) | tc       | Flow (ul/min) | kt (RU/Ms) | RI (RU)   | Chi <sup>2</sup> (RU <sup>2</sup> ) | U-value |
|---------------------|-----------|----------|----------|-----------|----------|----------|---------------|------------|-----------|-------------------------------------|---------|
| Curve               | 1.01E+05  | 0.0814   | 8.03E-07 | 2.68E+02  |          | 2.75E+13 |               |            |           | 13.7                                | 2       |
| Cycle: 26 0.0625 µM |           |          |          |           | 6.25E-08 |          | 50            | 1.01E+14   | -0.6185   |                                     |         |
| Cycle: 27 0.125 µM  |           |          |          |           | 1.25E-07 |          | 50            | 1.01E+14   | -1.053    |                                     |         |
| Cycle: 28 0.25 µM   |           |          |          |           | 2.50E-07 |          | 50            | 1.01E+14   | -11.73    |                                     |         |
| Cycle: 29 0.5 µM    |           |          |          |           | 5.00E-07 |          | 50            | 1.01E+14   | -3.85E+00 |                                     |         |
| Cycle: 30 1 µM      |           |          |          |           | 1.00E-06 |          | 50            | 1.01E+14   | 2.92E-03  |                                     |         |
| Cycle: 31 0.25 µM   |           |          |          |           | 2.50E-07 |          | 50            | 1.01E+14   | -3.30E+00 |                                     |         |

**Figure S59.** The SPR sensorgrams, fitting parameters and quality control table of DMZ p13 (1 replicate)

## Section D. QSAR modeling

### 1. Descriptor calculation

$$\frac{N_1}{N_0} = e^{-\Delta E/RT} \quad \text{Equation S1}$$

Equation S1 was used to calculate the ratio of two different molecular conformations, where  $N_1/N_0$  is the ratio of the number of molecules in the relative energy states,  $\Delta E$  is the energy difference between  $N_0$  and  $N_1$  (3 kcal/mol),  $R$  is the ideal gas constant (0.00198588 kcal/K mol), and  $T$  is the temperature (295 K).

$$A = \frac{\sum_i A_i e^{-\frac{E_i}{k_B T}}}{\sum_i e^{-\frac{E_i}{k_B T}}} \quad \text{Equation S2}$$

For a specific descriptor ( $A$ ), Equation S2 was used as Boltzmann average method to account for multiple conformations of a molecule and give the final descriptor value, where  $A_i$  is the descriptor value of conformation  $i$ ,  $E_i$  is the energy of conformation  $i$ ,  $k_B$  is the Boltzmann constant, and  $T$  is the temperature.

## 2. Methods and scripts

**Descriptor refinement** (performed on MATLAB (R2020a), use KD data as an example)

```
• load('KDdata.mat'); % this matrix contains the 1st row as the index of the
  variables names, 0 for response variable, here is lnKD
• % find features with constant entry>=80%, delete such features resulting new
• % dataset called:data_nonconst
• data=KDdata;
• for i=2:size(data,2)
•     Y(i)=max(sum(data(:,i)==data(:,i)'));
• end
•
• idx_const=find(Y(:)>=0.8*(size(data,1)-1));
• data_nonconst=data;
• data_nonconst(:,idx_const)=[];
•
• % find multicollinearity (abs(rho)>0.95) between features, delete ones with
  more than 1
• % multicollinearity, based on the max number of multicollinearity, saved the
• % refined data in the data_refine.
•
• data_refine=data_nonconst;
•
• cor=corrcoef(data_refine(2:size(data_refine,1),2:size(data_refine,2)));
• cor=abs(cor);
• [a,b]=find(cor>0.95);
• A=[b,a];
• id=find(b>=a);
• A(id,:)=[];
• uni=unique(A(:,1));
• num=zeros(size(uni,1),1);
•
• for i=1:size(uni,1)
•     idx=find(uni(i)==A(:,1));
•     num(i)=size(idx,1);
• end
•
• n=0;
• while max(num)>1 % repeat until only one more feature is correlated
•
• id_max=find(num==max(num));
• if size(id_max,1)>1
•     id_max=id_max(1,1);
• else
•     id_max=id_max;
• end
• del_col=find(A(:,1)==uni(id_max));
• id_del=A(del_col,2);
```

```

• data_refine(:,id_del+1)=[];
•
• cor=corrcoef(data_refine(2:size(data_refine,1),2:size(data_refine,2)));
• cor=abs(cor);
• [a,b]=find(cor>0.95);
• A=[b,a];
• id=find(b>=a);
• A(id,:) = [];
• uni=unique(A(:,1));
• num=zeros(size(uni,1),1);
• for i=1:size(uni,1)
•     idx=find(uni(i)==A(:,1));
•     num(i)=size(idx,1);
• end
• n=n+1; % record how many steps take to complete this task
• end
•
• % in a pair of multicorrelation, delete the one with lower correlation to the
y variable
• m=0;
• while size(A,1)>0
•     cor1=abs(corrcoef(data_refine(:,1),data_refine(:,A(1,1)+1)));
•     cor1=cor1(1,end);
•     cor2=abs(corrcoef(data_refine(:,1),data_refine(:,A(1,2)+1)));
•     cor2=cor2(1,end);
•
•     if cor1>=cor2
•         id_del=A(1,2);
•         data_refine(:,id_del+1)=[];
•     else
•         id_del=A(1,1);
•         data_refine(:,id_del+1)=[];
•     end
•     cor=corrcoef(data_refine(2:size(data_refine,1),2:size(data_refine,2)));
•     cor=abs(cor);
•     [a,b]=find(cor>0.95);
•     A=[b,a];
•     id=find(b>=a);
•     A(id,:) = [];
•     m=m+1; % record how many steps take to complete this task
• end
•
•
•
• save('KD_data_refine.mat','data_refine');

```

## Representative data splitting by Kennard-Stone algorithm and PCA (performed on RStudio v1.4.1717)

```
# load data
data <- read.csv('KD_refine.csv')

# create trainingset and testset id using kenStone on euclidian distance
library(prospectr)
xspace <- data[, -1]
ks <- kenStone(as.matrix(xspace), k=12, metric = "mahal", pc=0.99, .center =
TRUE, .scale = FALSE)
ks$test
trainid <- ks$test

# assign testset and trainingset
trainingset <- data[trainid,]
testset <- data[-trainid,]

x_train <- as.matrix(trainingset[-1])
y_train <- data.matrix(trainingset[1])
x <- x_train
y <- y_train
x_test <- as.matrix(testset[-1])
y_test <- as.matrix(testset[1])

data_pca <- data

data_pca$lnKD[trainid]=0
data_pca$lnKD[-trainid]=1

pc <- prcomp(data_pca[, -1], scale. = TRUE)
summary(pc)
plot(pc, type="lines")

library(rgl)
library(ggplot2)
library(ggfortify)
library(magrittr)

# design figure frame and axis tick
tick_frame <-
  data.frame(ticks = seq(-20, 20, length.out = 5),
             zero=0) %>%
  subset(ticks != 0)

lab_frame <- data.frame(lab = seq(-20, 20),
                       zero = 0) %>%
  subset(lab != 0)

tick_sz <- (tail(lab_frame$lab, 1) - lab_frame$lab[1]) / 128

pc_plot <- cbind(data_pca[, 1], pc$x)

# PLOT ----
ggplot(pc_plot, aes(x=pc_plot[, 2], y=pc_plot[, 3])) +labs(x = 'PC1 (29.93%)', y
= 'PC2 (20.81%)')+
```

```

# y axis line
geom_segment(x = 0, xend = 0,
             y = lab_frame$lab[1], yend = tail(lab_frame$lab, 1),
             size = 1.5) +
# x axis line
geom_segment(y = 0, yend = 0,
             x = lab_frame$lab[1], xend = tail(lab_frame$lab, 1),
             size = 1.5) +
# x ticks
geom_segment(data = tick_frame,
            aes(x = ticks, xend = ticks,
               y = zero, yend = zero + tick_sz),size =1.5) +
# y ticks
geom_segment(data = tick_frame,
            aes(x = zero, xend = zero + tick_sz,
               y = ticks, yend = ticks),size =1.5) +

# labels
geom_text(data=tick_frame, aes(x=ticks, y=zero, label=ticks),
          vjust=1.5,size = 6) +
geom_text(data=tick_frame, aes(x=zero, y=ticks, label=ticks),
          hjust=1.5,size = 6) +
# legends
scale_color_discrete(name = "dataset",
                    labels=c("Trainingset", "Testset"))+
# THE DATA POINT
geom_point(aes(color = factor(V1)),size = 4,alpha =.6) +
scale_color_manual(labels = c("Training set", "Test set"), values =
c("dodgerblue", "red2"))+
# title
ggtitle("Test set molecules in 2D chemical space")+

theme_bw()+
theme(panel.border = element_blank(), panel.grid.major = element_blank(),
      panel.grid.minor = element_blank())+
theme(axis.ticks.x = element_blank(),
      axis.text.x = element_blank(),
      axis.ticks.y = element_blank(),
      axis.text.y = element_blank())+
theme(axis.title = element_text(size = 22, face = "bold"))+
theme(plot.title = element_text(hjust = 0.5)) +theme(plot.title =
element_text(size = 30, face = "bold"))+
theme(legend.title = element_blank(),
      legend.text = element_text(color = "black",size = 20,face =
"bold"))+theme(legend.position="none")

ggsave("datasplit.tiff", units="in", width=6, height=6, dpi=600)

```



## Descriptor selection by lasso and model selection (performed on RStudio v1.4.1717)

```
# load data
data <- read.csv('KD_refine.csv')

# Creat the evaluation function: eval_results, which contains RMSE and
Rsquare
eval_results <- function(true, predicted, df) {
  SSE <- sum((predicted - true)^2)
  SST <- sum((true - mean(true))^2)
  R_square <- 1 - SSE / SST
  RMSE = sqrt(SSE/nrow(df))
  # Model performance metrics
  data.frame(
    RMSE = RMSE,
    Rsquare = R_square)
}

# create trainingset and testset id using kenStone on Mahalanobis distance
library(prospectr)
xspace <- data[,-1]
ks <- kenStone(as.matrix(xspace), k=12, metric = "mahal",pc=0.99, .center =
TRUE, .scale = FALSE)
ks$test
trainid <- ks$test

# assign testset and trainingset
trainingset <- data[trainid,]
testset <- data[-trainid,]

x_train <- as.matrix(trainingset[-1])
y_train <- data.matrix(trainingset[1])
x <- x_train
y <- y_train
x_test <- as.matrix(testset[-1])
y_test <- as.matrix(testset[1])

# lasso regression
library(glmnet)
set.seed(1)
lambdas <- 10^seq(2, -6, length = 100)

# use sv.glmnet to find the best lambda for lasso from 5-fold cv
lasso_reg <- cv.glmnet(x_train, y_train, alpha = 1, lambda = lambdas,
standardize = TRUE, nfolds = 5)
plot(lasso_reg)

# plot the shrinkage graph with multiple lambda values
lasso_model <- glmnet(x_train, y_train, alpha = 1, nlambda =100,standardize =
TRUE)
print(lasso_model)
p1 <- plot(lasso_model,xvar="lambda",label = T, lwd=4,cex.lab=
2,cex.axis=2,xlim = c(-4.5,0.5), ylim=c(-20,20))
```

```

p1.lty=2
box(lwd=4)

# chose the lambda with lowest mean-squared error from cv
lambda_best_lasso <- lasso_reg$lambda.min
lambda_best_lasso

# build the lasso regression model using selected descriptors
lasso_model <- glmnet(x_train, y_train, alpha = 1, lambda
=lambda_best_lasso,standardize = TRUE)
summary(lasso_model)

# find the non-zero coefficients and their names
lasso.coef <- predict(lasso_model,type="coefficients")
lasso.coef
lasso.coef[lasso.coef!=0]
lasso_nonzerocoef <- predict(lasso_model,type="nonzero")
lasso_nonzerocoef
colnames(data[,lasso_nonzerocoef$s0+1])

# model evaluation on lasso model using all non-zero descriptors
lasso_fittings <- predict(lasso_model, s = lambda_best_lasso, newx = x)
lasso_predictions <- predict(lasso_model, s = lambda_best_lasso, newx =
x_test)
eval_results(y_test, lasso_predictions, testset)
eval_results(y_train, lasso_fittings, trainingset)

# exhaustively search for all combinations
# m = number of features in the model, data_step contains all non-zero
descriptor candidates, "results" summarizes all results
data_step <- trainingset[,append(lasso_nonzerocoef$s0+1,1,0)]
m <- 3
idx <- combn(rep(1:(length(data_step)-1)),m)
results <- NULL
for (i in 1:ncol(idx)) {

  data_exhau <- data_step[,append(idx[,i]+1,1,0)]
  mdl_exhau <- lm(lnKD~.,data=data_exhau)

  predict <- predict(mdl_exhau,newdata = testset)
  fitted <- mdl_exhau$fitted.values
  a <- eval_results(testset$lnKD,predict,testset)
  b <- eval_results(trainingset$lnKD,fitted,trainingset)

  result <- data.frame(test=a,
                      train=b
                      )
  results<- rbind(results,result)
}

# idrows find all candidates with top performance, and print out the model
summary for statistical significance check
idrows <- which(results$test.Rsquare>=0.7&results$train.Rsquare>=.7)

for (val in idrows) {
  data_exhau <- data_step[,append(idx[,val]+1,1,0)]
  mdl_exhau <- lm(lnKD~.,data=data_exhau)

```

```

s <- summary mdl_exhau
print(s)
print(val)
cat("R2_test:", results[val,2])
}

# plot the curve for the top model
library(ggplot2)
# load the model
mdl <- lm(formula = "lnKD~1+PEOE_VSA_POS+vsurf_DW12+vsa_other+vsurf_ID3",
          data = trainingset)
summary(mdl)
predict <- predict(mdl,newdata = data)
id <- numeric(48)
id[-trainid] <- 1
data_plot <- cbind(predict,data$lnKD,id)
colnames(data_plot) <- c("predict", "obs","id")

ggplot(as.data.frame(data_plot), aes(x=obs,y=predict))+
  ggtitle(expression("Baseline model of lnK"[D]*"")) +
  xlab(expression("Observed lnK"[D]*"")) + ylab(expression("Predicted
lnK"[D]*""))+
  # THE DATA POINT
  geom_point(aes(color = factor(id)),size = 5,alpha =1) +
  xlim(min(data$lnKD)-2,max(data$lnKD)+2)+
  ylim(min(data$lnKD)-2,max(data$lnKD)+2)+
  scale_color_manual(labels = c("Training set", "Test set"), values =
c("dodgerblue", "red2"))+

  # title
  theme_bw()+
  theme(axis.ticks.length=unit(.4,"lines"))+
  theme(panel.grid.major = element_blank(),
        panel.grid.minor = element_blank())+
  theme(axis.text.y = element_text(size = 20),
        axis.text.x = element_text(size=20),
        axis.title = element_text(size = 25,face = 'bold'),title
=element_text(size = 25,face = 'bold') )+
# legend
  theme(legend.title = element_blank())+
  theme(legend.text = element_text(colour="black", size=20, face="bold"))+
  theme(legend.position = c(0.80, 0.1))+
# rec
  theme(panel.background = element_rect(colour = "black", size = 3.5))+
# ref line
  geom_abline(intercept = 0, slope = 1, color="black",
             linetype="dashed", size=1.5)

ggsave("KDmdl.tiff", units="in", width=8, height=8, dpi=600)

```

## Ensemble learning-based models (performed on RStudio v1.4.1717)

```
# load data
data <- read.csv('KD_refine.csv')

# Create the evaluation function: eval_results, which contained RMSE and
Rsquare
eval_results <- function(true, predicted, df) {
  SSE <- sum((predicted - true)^2)
  SST <- sum((true - mean(true))^2)
  R_square <- 1 - SSE / SST
  RMSE = sqrt(SSE/nrow(df))
  # Model performance metrics
  data.frame(
    RMSE = RMSE,
    Rsquare = R_square)
}

# create trainingset and testset id using kenStone on Mahalanobis distance
library(prospectr)
xspace <- data[,-1]
ks <- kenStone(as.matrix(xspace), k=12, metric = "mahal", pc=0.99, .center =
TRUE, .scale = FALSE)
ks$test
trainid <- ks$test

# assign testset and trainingset
trainingset <- data[trainid,]
testset <- data[-trainid,]

x_train <- as.matrix(trainingset[-1])
y_train <- data.matrix(trainingset[1])
x <- x_train
y <- y_train
x_test <- as.matrix(testset[-1])
y_test <- as.matrix(testset[1])

# build a tree
library(tree)
tree.KD <- tree(lnKD~., data, subset = trainid)
plot(tree.KD)
text(tree.KD)

# evaluate the prediction and fitting
pred_KD <- predict(tree.KD, newdata = testset)
fitted <- predict(tree.KD, , newdata = trainingset)
eval_results(testset$lnKD, pred_KD, testset)
eval_results(trainingset$lnKD, fitted, trainingset)

# use CV to select best size
set.seed(1)
tree.KD_cv <- cv.tree(tree.KD)
plot(tree.KD_cv$size, tree.KD_cv$dev, type = 'b')
prune_KD <- prune.tree(tree.KD, best = 6)
pred_KD <- predict(prune_KD, newdata = testset)
plot(prune_KD)
```

```

text(prune_KD)
fitted <- predict(prune_KD,,newdata = trainingset)
eval_results(testset$lnKD,pred_KD,testset)
eval_results(trainingset$lnKD,fitted,trainingset)

# bagging: set mtry = 193 in randomForest method
library(randomForest)
set.seed(1)
rf_KD <- randomForest(lnKD~., data = trainingset, importance = TRUE, ntree =
200, sampsize=24, mtry = 193)
summary(rf_KD)
print(rf_KD)

# plot
plot(rf_KD, main = "Averaged OOB error", cex.lab=2, cex.axis=2, cex.main=2,
lwd=4, col = "red")
pred_KD <- predict(rf_KD, newdata = testset)
fitted <- predict(rf_KD,, newdata = trainingset)
eval_results(testset$lnKD, pred_KD, testset)
eval_results(trainingset$lnKD, fitted, trainingset)
varImpPlot(rf_KD, main = "Variable importance plot")

# random forest
library(randomForest)
set.seed(1)
rf_KD <- randomForest(lnKD~., data = trainingset, importance = TRUE, sampsize =
34, ntree = 100, mty=40)
summary(rf_KD)
print(rf_KD)
plot(rf_KD, main = "Averaged OOB error", cex.lab=2, cex.axis=2, cex.main=2,
lwd=4, col = "red")
pred_KD <- predict(rf_KD, newdata = testset)
fitted <- predict(rf_KD,, newdata = trainingset)
eval_results(testset$lnKD, pred_KD, testset)
eval_results(trainingset$lnKD, fitted, trainingset)
varImpPlot(rf_KD, main = "Variable importance plot")

# plot
predict <- predict(rf_KD, newdata = data)
id <- numeric(48)
id[-trainid] <- 1
data_plot <- cbind(predict, data$lnKD, id)
colnames(data_plot) <- c("predict", "obs", "id")

ggplot(as.data.frame(data_plot), aes(x=obs, y=predict))+
  ggtitle(expression("Baseline model of lnK" [D]*"")) +
  xlab(expression("Observed lnK" [D]*"")) + ylab(expression("Predicted
lnK" [D]*""))+
  # THE DATA POINT
  geom_point(aes(color = factor(id)), size = 5, alpha =1) +
  xlim(min(data$lnKD)-2, max(data$lnKD)+2)+
  ylim(min(data$lnKD)-2, max(data$lnKD)+2)+
  scale_color_manual(labels = c("Training set", "Test set"), values =
c("dodgerblue", "red2"))+

# title

```

```

theme_bw()+
theme(axis.ticks.length=unit(.4,"lines"))+
theme(panel.grid.major = element_blank(),
      panel.grid.minor = element_blank())+
theme(axis.text.y = element_text(size = 20),
      axis.text.x = element_text(size=20),
      axis.title = element_text(size = 25,face = 'bold'),title
=element_text(size = 25,face = 'bold') )+
# legend
theme(legend.title = element_blank())+
theme(legend.text = element_text(colour="black", size=20, face="bold"))+
theme(legend.position = c(0.80, 0.1))+
# rec
theme(panel.background = element_rect(colour = "black", size = 3.5))+
# ref line
geom_abline(intercept = 0, slope = 1, color="black",
            linetype="dashed", size=1.5)

ggsave("rfmdl.tiff", units="in", width=8, height=8, dpi=600)

# boosting using GBM in r
library(gbm)
set.seed(1)
boost_KD <- gbm(lnKD~.,data=trainingset,distribution =
'gaussian',n.trees=2000,interaction.depth=1,
              shrinkage = 0.01,cv.folds = 5,verbose =
TRUE,n.minobsinnode=4,bag.fraction = 0.5 )
summary(boost_KD)
print(boost_KD)
sqrt(min(boost_KD$cv.error))
gbm.perf(boost_KD, method = "cv")
legend(1200, .5, c("OOB(Out Of Bag estimator method)", "CV(Cross Validation
method)"), cex=0.8, col=c("black", "green"), lty=1)
pred_KD <-predict(boost_KD,newdata = testset,n.trees = 990)
fitted <- predict(boost_KD,newdata = trainingset,n.trees =990)
eval_results(testset$lnKD,pred_KD,testset)
eval_results(trainingset$lnKD,fitted,trainingset)

# plot
predict <- predict(boost_KD,newdata = data,ntrees =500)
id <- numeric(48)
id[-trainid] <- 1
data_plot <- cbind(predict,data$lnKD,id)
colnames(data_plot) <- c("predict", "obs","id")

ggplot(as.data.frame(data_plot), aes(x=obs,y=predict))+
  ggtitle(expression("Baseline model of lnK" [D]*"")) +
  xlab(expression("Observed lnK" [D]*"")) + ylab(expression("Predicted
lnK" [D]*""))+
  # THE DATA POINT
  geom_point(aes(color = factor(id)),size = 5,alpha =1) +
  xlim(min(data$lnKD)-2,max(data$lnKD)+2)+
  ylim(min(data$lnKD)-2,max(data$lnKD)+2)+
  scale_color_manual(labels = c("Training set", "Test set"), values =
c("dodgerblue", "red2"))+

# title

```

```

theme_bw()+
theme(axis.ticks.length=unit(.4,"lines"))+
theme(panel.grid.major = element_blank(),
      panel.grid.minor = element_blank())+
theme(axis.text.y = element_text(size = 20),
      axis.text.x = element_text(size=20),
      axis.title = element_text(size = 25,face = 'bold'),title
=element_text(size = 25,face = 'bold') )+
# legend
theme(legend.title = element_blank())+
theme(legend.text = element_text(colour="black", size=20, face="bold"))+
theme(legend.position = c(0.80, 0.1))+
# rec
theme(panel.background = element_rect(colour = "black", size = 3.5))+
# ref line
geom_abline(intercept = 0, slope = 1, color="black",
            linetype="dashed", size=1.5)

ggsave("gbmmdl.tiff", units="in", width=8, height=8, dpi=600)

```

## Model assessment: Q-Q plot and Williams plot (performed on RStudio v1.4.1717)

```
# load data
data <- read.csv('KD_refine.csv')

# create trainingset and testset id using kenStone on Mahalanobis distance
library(prospectr)
xspace <- data[, -1]
ks <- kenStone(as.matrix(xspace), k=12, metric = "mahal", pc=0.99, .center =
TRUE, .scale = FALSE)
ks$test
trainid <- ks$test

# assign testset and trainingset
trainingset <- data[trainid,]
testset <- data[-trainid,]

x_train <- as.matrix(trainingset[-1])
y_train <- data.matrix(trainingset[1])
x <- x_train
y <- y_train
x_test <- as.matrix(testset[-1])
y_test <- as.matrix(testset[1])

# model gonna be assessed
mdl <- lm(formula = "lnKD~1+PEOE_VSA_POS+vsurf_DW12+vsa_other+vsurf_ID3",
data = trainingset)
summary(mdl)

# plot q-q plot

qqnorm(mdl$residuals, pch = 19, cex = 2.5, col="blue")
qqline(mdl$residuals, col = "black", lwd = 3, lty = 2)

# Williams plot for lnKD model
library(matlib)
library(ggplot2)
wp_x <-
cbind(data$PEOE_VSA_POS, data$vsurf_DW12, data$vsa_other, data$vsurf_ID3)

h <- diag(wp_x%*%inv((t(wp_x)%*%wp_x))%*%t(wp_x))

stdres_train <- (mdl$residuals-mean(mdl$residuals))/sd(mdl$residuals)
res_test <- predict(mdl, newdata=testset)-testset$lnKD
stdres_test <- (res_test-mean(mdl$residuals))/sd(mdl$residuals)

wp_mt <- matrix(0, 48, 3)
wp_mt[testid, 1] <- 1
wp_mt[, 2] <- h
wp_mt[trainid, 3] <- stdres_train
wp_mt[testid, 3] <- stdres_test

colnames(wp_mt)=c("id", "hatvalue", "stdres")

ggplot(as.data.frame(wp_mt), aes(x=hatvalue, y=stdres))+
  ggtitle(expression("Williams plot: lnK" [D] * "")) +
```



```

xlab(expression("Leverage")) + ylab(expression("Standardized residuals"))+
# THE DATA POINT
geom_point(aes(color = factor(id)),size = 5,alpha =1) +
xlim(0,0.8)+
ylim(-4,4)+
scale_color_manual(labels = c("Training set", "Test set"), values =
c("dodgerblue", "red2"))+

# title
theme_bw()+
theme(axis.ticks.length=unit(.4,"lines"))+
theme(panel.grid.major = element_blank(),
      panel.grid.minor = element_blank())+
theme(axis.text.y = element_text(size = 20),
      axis.text.x = element_text(size=20),
      axis.title = element_text(size = 25,face = 'bold'),title
=element_text(size = 25,face = 'bold') )+
# legend
theme(legend.title = element_blank())+
theme(legend.text = element_text(colour="black", size=20, face="bold"))+
theme(legend.position = c(0.80, 0.1))+
# rec
theme(panel.background = element_rect(colour = "black", size = 3.5))+
# ref line
geom_abline(intercept = 3, slope = 0, color="black",
            linetype="dashed", size=1.5)+
geom_abline(intercept = -3, slope = 0, color="black",
            linetype="dashed", size=1.5)+
geom_vline(xintercept = 3*5/36, color="black",
            linetype="dashed", size=1.5)

plot(diag(h),stdred,col=c("blue4"),pch =19,cex = 2,cex.lab=2,cex.axis =
2,xlim=c(0,0.5),ylim=c(-4,4))

```

## Predictor stability test (performed on RStudio v1.4.1717)

```
# load data
data <- read.csv('KD_refine.csv')

# Creat the evaluation function: eval_results, which contains RMSE and
Rsquare
eval_results <- function(true, predicted, df) {
  SSE <- sum((predicted - true)^2)
  SST <- sum((true - mean(true))^2)
  R_square <- 1 - SSE / SST
  RMSE = sqrt(SSE/nrow(df))
  # Model performance metrics
  data.frame(
    RMSE = RMSE,
    Rsquare = R_square)
}

# randomize the data splitting 100 times (36:12)
results <- NULL
for (i in 1:100){
  set.seed(i)
  testid <- sample(seq_len(nrow(data)),size=12)

  # assign testset and trainingset
  trainingset <- data[-testid,]
  testset <- data[testid,]
  x_train <- as.matrix(trainingset[-1])
  y_train <- data.matrix(trainingset[1])
  x <- x_train
  y <- y_train
  x_test <- as.matrix(testset[-1])
  y_test <- as.matrix(testset[1])
  mdl <- lm(formula = "lnKD~1+PEOE_VSA_POS+vsa_other+vsurf_DW12+vsurf_ID3",
            data = trainingset) # using the same descriptors to build the
model

  predict <- predict(mdl,newdata = testset)
  fitted <- mdl$fitted.values
  a <- eval_results(testset$lnKD,predict,testset)
  b <- eval_results(trainingset$lnKD,fitted,trainingset)
  result <- data.frame(test=a,
                      train=b
  )
  results<- rbind(results,result)
}

# plot
barplot(results$test.Rsquare,xlim = c(0,i*1.2),ylim=c(-.5,1.5),lwd=3)
abline(h=mean(results$test.Rsquare), col ="Red",lwd = 5,xlim=c(0,i))
text(x = c(0.1*i,0.3*i,0.4*i,0.5*i),
     y = c(1.2,1.2,1.2,1.2),cex = 1.5,
     labels = c("R2_test = ", round(mean(results$test.Rsquare),2), "+/-",
round(sd(results$test.Rsquare),2)))
```

```
barplot(results$train.Rsquare,xlim = c(0,i*1.2),ylim=c(0,1),lwd=3)
abline(h=mean(results$train.Rsquare), col = "Red",lwd = 5,xlim=c(0,i))
text(x = c(0.1*i,0.3*i,0.4*i,0.5*i),
     y = c(0.9,0.9,0.9,0.9),cex = 1.5,
     labels = c("R2_train = ", round(mean(results$train.Rsquare),2), "+/-",
round(sd(results$train.Rsquare),2)))
```

## References:

1. Patwardhan, N. N.; Ganser, L. R.; Kapral, G. J.; Eubanks, C. S.; Lee, J.; Sathyamoorthy, B.; Al-Hashimi, H. M.; Hargrove, A. E., Amiloride as a new RNA-binding scaffold with activity against HIV-1 TAR. *MedChemComm* **2017**, *8* (5), 1022-1036.
2. Patwardhan, N. N.; Cai, Z.; Umuhire Juru, A.; Hargrove, A. E., Driving factors in amiloride recognition of HIV RNA targets. *Org Biomol Chem* **2019**, *17* (42), 9313-9320.
3. Umuhire Juru, A.; Cai, Z.; Jan, A.; Hargrove, A. E., Template-guided selection of RNA ligands using imine-based dynamic combinatorial chemistry. *Chemical Communications* **2020**, *56* (24), 3555-3558.
4. Donlic, A.; Morgan, B. S.; Xu, J. L.; Liu, A.; Roble Jr, C.; Hargrove, A. E., Discovery of Small Molecule Ligands for MALAT1 by Tuning an RNA-Binding Scaffold. *Angewandte Chemie* **2018**, *130* (40), 13426-13431.
5. Donlic, A.; Zafferani, M.; Padroni, G.; Puri, M.; Hargrove, Amanda E., Regulation of MALAT1 triple helix stability and in vitro degradation by diphenylfurans. *Nucleic Acids Research* **2020**, *48* (14), 7653-7664.
